# Supplementary material
Source: publisher figshare collection journal article supplement (https://gsajournals.figshare.com/ndownloader/files/13384061)
Supplement: Supplementary file 1 [file 13384061]

## Sheet: SLB
trait	plot_nrsry	year	location	rep	block	range	row	field_block	plot_xprmnt	pedigree	entry	dta	sc1	sc2	sc3	sc4	eh	ph	audpc
SLB	9144	2014	1	1	1	12	17	1	2	Ki3xOh7B	DRIL38.014	74	8	7.5	7	5	36	34	6.8
SLB	9145	2014	1	1	1	12	18	1	3	Ki3xOh7B	DRIL38.152	70	7	7	5.5	2	44	30	5.4
SLB	9146	2014	1	1	1	12	19	1	4	Ki3xOh7B	DRIL38.036	70	8	7.5	6	4	43	34	6.3
SLB	9148	2014	1	1	1	12	21	1	6	Ki3xOh7B	DRIL38.053	72	8	7.5	6.5	5	40	36	6.7
SLB	9149	2014	1	1	1	12	22	1	7	Ki3xOh7B	DRIL38.068	73	7.5	7.5	6	4.5	32	14	6.3
SLB	9150	2014	1	1	1	12	23	1	8	Ki3xOh7B	DRIL38.041	72	7.5	7	5.5	3	30	12	5.7
SLB	9152	2014	1	1	1	12	25	1	10	Ki3xOh7B	DRIL38.218	75	8	7	6	5.5	32	31	6.5
SLB	9153	2014	1	1	1	12	26	1	11	Ki3xOh7B	DRIL38.196	75	8.5	7	6	5.5	NA	8	6.5
SLB	9155	2014	1	1	1	12	28	1	13	Ki3xOh7B	DRIL38.197	73	8	7.5	7	6	27	18	7.1
SLB	9156	2014	1	1	1	13	28	1	14	Ki3xOh7B	DRIL38.172	74	8.5	8	7	6	32	22	7.3
SLB	9157	2014	1	1	1	13	27	1	15	Ki3xOh7B	DRIL38.119	65	7.5	7.5	6	5	26	14	6.4
SLB	9158	2014	1	1	1	13	26	1	16	Ki3xOh7B	DRIL38.018	74	7.5	7.5	5.5	4.5	30	18	6.1
SLB	9159	2014	1	1	1	13	25	1	17	Ki3xOh7B	DRIL38.230	74	8.5	8	7.5	6	25	4	7.5
SLB	9160	2014	1	1	1	13	24	1	18	Ki3xOh7B	DRIL38.064	75	8	7	6	4	30	16	6.1
SLB	9161	2014	1	1	1	13	23	1	19	Ki3xOh7B	DRIL38.077	73	7.5	7.5	6	5	36	22	6.4
SLB	9162	2014	1	1	2	13	22	1	20	Ki3xOh7B	DRIL38.209	72	7.5	7	7	6	42	32	6.9
SLB	9163	2014	1	1	2	13	21	1	21	Ki3xOh7B	DRIL38.050	70	7.5	7.5	7	5.5	44	39	6.9
SLB	9165	2014	1	1	2	13	19	1	23	Ki3xOh7B	DRIL38.166	73	7.5	7	6	4.5	44	39	6.2
SLB	9167	2014	1	1	2	13	17	1	25	Ki3xOh7B	DRIL38.198	75	8	7	7	4	34	12	6.5
SLB	9168	2014	1	1	2	13	16	1	26	Ki3xOh7B	DRIL38.010	70	7.5	7.5	6.5	5	40	31	6.6
SLB	9169	2014	1	1	2	13	15	1	27	Ki3xOh7B	DRIL38.017	72	7.5	7	5.5	5	35	32	6.1
SLB	9172	2014	1	1	2	13	12	1	30	Ki3xOh7B	DRIL38.160	74	8	7.5	7.5	6	3	36	7.2
SLB	9173	2014	1	1	2	13	11	1	31	Ki3xOh7B	DRIL38.224	75	8	7.5	7.5	6	40	37	7.2
SLB	9174	2014	1	1	2	13	10	1	32	Ki3xOh7B	DRIL38.093	71	8	7.5	6.5	4.5	43	30	6.6
SLB	9175	2014	1	1	2	13	9	1	33	Ki3xOh7B	DRIL38.118	NA	NA	NA	NA	NA	NA	1	NA
SLB	9176	2014	1	1	2	13	8	1	34	Ki3xOh7B	DRIL38.032	73	8	7.5	7.5	7	44	34	7.5
SLB	9178	2014	1	1	2	13	6	1	36	Ki3xOh7B	DRIL38.110	70	7.5	7.5	7.5	6	42	34	7.2
SLB	9179	2014	1	1	2	13	5	1	37	Ki3xOh7B	DRIL38.231	66	7.5	7.5	7	6	38	37	7
SLB	9181	2014	1	1	3	13	3	1	39	Ki3xOh7B	DRIL38.181	74	7.5	7.5	6	5	35	16	6.4
SLB	9182	2014	1	1	3	13	2	1	40	Ki3xOh7B	DRIL38.179	75	7	7	6	4	36	15	6
SLB	9183	2014	1	1	3	13	1	1	41	Ki3xOh7B	DRIL38.115	75	7	7	6	4	34	26	6
SLB	9185	2014	1	1	3	14	2	1	43	Ki3xOh7B	DRIL38.006	74	7.5	7.5	7.5	6.5	34	21	7.3
SLB	9186	2014	1	1	3	14	3	1	44	Ki3xOh7B	DRIL38.190	75	8	7.5	7.5	7	32	20	7.5
SLB	9188	2014	1	1	3	14	5	1	46	Ki3xOh7B	DRIL38.067	75	8	7	6	5	36	28	6.3
SLB	9189	2014	1	1	3	14	6	1	47	Ki3xOh7B	DRIL38.120	69	7.5	7.5	5.5	2	32	26	5.6
SLB	9190	2014	1	1	3	14	7	1	48	Ki3xOh7B	DRIL38.138	73	7.5	7	6	4	34	26	6.1
SLB	9192	2014	1	1	3	14	9	1	50	Ki3xOh7B	DRIL38.003	68	7.5	7	6	5	39	26	6.3
SLB	9193	2014	1	1	3	14	10	1	51	Ki3xOh7B	DRIL38.071	74	7.5	7	6	5	34	20	6.3
SLB	9194	2014	1	1	3	14	11	1	52	Ki3xOh7B	DRIL38.188	68	7.5	7.5	7	5	32	27	6.8
SLB	9195	2014	1	1	3	14	12	1	53	Ki3xOh7B	DRIL38.117	72	7.58	7.5	6	5	28	25	6.4
SLB	9196	2014	1	1	3	14	13	1	54	Ki3xOh7B	DRIL38.171	73	7.5	7.5	7	6	32	25	7
SLB	9197	2014	1	1	3	14	14	1	55	Ki3xOh7B	DRIL38.076	75	8	7	6	5.5	34	32	6.5
SLB	9198	2014	1	1	3	14	15	1	56	Ki3xOh7B	DRIL38.035	74	7	7.5	7	5.5	35	30	6.8
SLB	9199	2014	1	1	3	14	16	1	57	Ki3xOh7B	DRIL38.089	75	8	7	6	4	NA	16	6.1
SLB	9200	2014	1	1	4	14	17	1	58	Ki3xOh7B	DRIL38.059	74	8	7.5	6	5	28	16	6.5
SLB	9201	2014	1	1	4	14	18	1	59	Ki3xOh7B	DRIL38.007	75	7	7.5	6.5	5	44	22	6.5
SLB	9202	2014	1	1	4	14	19	1	60	Ki3xOh7B	DRIL38.145	73	8	7	6	2	32	20	5.7
SLB	9203	2014	1	1	4	14	20	1	61	Ki3xOh7B	DRIL38.037	70	8	7.5	7.5	6	34	31	7.2
SLB	9204	2014	1	1	4	14	21	1	62	Ki3xOh7B	DRIL38.049	72	7	7	6	4	32	27	6
SLB	9205	2014	1	1	4	14	22	1	63	Ki3xOh7B	DRIL38.103	74	7.5	7.5	6	5	38	35	6.4
SLB	9207	2014	1	1	4	14	24	1	65	Ki3xOh7B	DRIL38.131	73	7.5	7	6	5	28	14	6.3
SLB	9208	2014	1	1	4	14	25	1	66	Ki3xOh7B	DRIL38.020	75	7	7	6	4.5	35	22	6.1
SLB	9209	2014	1	1	4	14	26	1	67	Ki3xOh7B	DRIL38.061	73	7.5	6	5.5	2	28	21	5.2
SLB	9210	2014	1	1	4	14	27	1	68	Ki3xOh7B	DRIL38.136	74	7.5	7.5	7	6	35	33	7
SLB	9211	2014	1	1	4	14	28	1	69	Ki3xOh7B	DRIL38.169	72	7.5	7	7	5	35	30	6.6
SLB	9212	2014	1	1	4	15	28	1	70	Ki3xOh7B	DRIL38.083	72	8	7	6	4	30	20	6.1
SLB	9213	2014	1	1	4	15	27	1	71	Ki3xOh7B	DRIL38.178	74	8	7.5	7	5.5	36	31	7
SLB	9215	2014	1	1	4	15	25	1	73	Ki3xOh7B	DRIL38.066	75	7.5	7	7	5	30	22	6.6
SLB	9216	2014	1	1	4	15	24	1	74	Ki3xOh7B	DRIL38.150	72	7.5	7.5	6	4.5	29	22	6.3
SLB	9217	2014	1	1	4	15	23	1	75	Ki3xOh7B	DRIL38.151	74	7.5	7.5	6.5	4.5	38	14	6.5
SLB	9218	2014	1	1	4	15	22	1	76	Ki3xOh7B	DRIL38.207	73	7.5	7	6	4	34	38	6.1
SLB	9219	2014	1	1	5	15	21	1	77	Ki3xOh7B	DRIL38.186	70	7.5	7.5	6.5	5	33	23	6.6
SLB	9220	2014	1	1	5	15	20	1	78	Ki3xOh7B	DRIL38.038	70	8	7	6.5	4.5	40	32	6.4
SLB	9222	2014	1	1	5	15	18	1	80	Ki3xOh7B	DRIL38.214	72	7.5	7	6.5	3.5	34	19	6.1
SLB	9223	2014	1	1	5	15	17	1	81	Ki3xOh7B	DRIL38.058	72	8	7	6.5	5	37	25	6.5
SLB	9224	2014	1	1	5	15	16	1	82	Ki3xOh7B	DRIL38.133	71	9	8.5	7.5	6.5	34	17	7.8
SLB	9226	2014	1	1	5	15	14	1	84	Ki3xOh7B	DRIL38.194	75	7.5	7.5	7.5	4	NA	14	6.7
SLB	9227	2014	1	1	5	15	13	1	85	Ki3xOh7B	DRIL38.040	75	7.5	7	6	3	28	8	5.8
SLB	9229	2014	1	1	5	15	11	1	87	Ki3xOh7B	DRIL38.122	74	7.5	7.5	6.5	4	26	10	6.4
SLB	9230	2014	1	1	5	15	10	1	88	Ki3xOh7B	DRIL38.024	75	7.5	7.5	6.5	4.5	28	15	6.5
SLB	9232	2014	1	1	5	15	8	1	90	Ki3xOh7B	DRIL38.167	70	7.5	7	6	4	36	27	6.1
SLB	9233	2014	1	1	5	15	7	1	91	Ki3xOh7B	DRIL38.140	74	8	7.5	6	5	34	18	6.5
SLB	9234	2014	1	1	5	15	6	1	92	Ki3xOh7B	DRIL38.054	74	8.5	7.5	7	5.5	28	20	7
SLB	9235	2014	1	1	5	15	5	1	93	Ki3xOh7B	DRIL38.219	73	8.5	8	8	7	27	12	7.9
SLB	9236	2014	1	1	5	15	4	1	94	Ki3xOh7B	DRIL38.012	70	8	7.5	6.5	5	39	27	6.7
SLB	9237	2014	1	1	5	15	3	1	95	Ki3xOh7B	DRIL38.229	73	7.5	7	6	5	26	14	6.3
SLB	9238	2014	1	1	6	15	2	1	96	Ki3xOh7B	DRIL38.137	75	7.5	6	5.5	2	19	3	5.2
SLB	9239	2014	1	1	6	15	1	1	97	Ki3xOh7B	DRIL38.159	74	7.5	7	6	5	26	15	6.3
SLB	9240	2014	1	1	6	16	1	1	98	Ki3xOh7B	DRIL38.232	70	7.5	7	6.5	5.5	26	10	6.6
SLB	9241	2014	1	1	6	16	2	1	99	Ki3xOh7B	DRIL38.227	75	7	6	6	5	30	17	5.9
SLB	9242	2014	1	1	6	16	3	1	100	Ki3xOh7B	DRIL38.073	75	7.5	7	6	4.5	30	18	6.2
SLB	9243	2014	1	1	6	16	4	1	101	Ki3xOh7B	DRIL38.086	75	7	7	6	6	27	6	6.4
SLB	9244	2014	1	1	6	16	5	1	102	Ki3xOh7B	DRIL38.141	75	7.5	6.5	6	5	26	19	6.1
SLB	9245	2014	1	1	6	16	6	1	103	Ki3xOh7B	DRIL38.222	75	7.5	7	6	4	25	12	6.1
SLB	9246	2014	1	1	6	16	7	1	104	Ki3xOh7B	DRIL38.113	75	7.5	7	6	4	27	8	6.1
SLB	9248	2014	1	1	6	16	9	1	106	Ki3xOh7B	DRIL38.015	75	7.5	7	6	4	NA	6	6.1
SLB	9249	2014	1	1	6	16	10	1	107	Ki3xOh7B	DRIL38.055	75	7.5	7	6	4	NA	12	6.1
SLB	9251	2014	1	1	6	16	12	1	109	Ki3xOh7B	DRIL38.191	75	7.5	7	6	4	NA	58	6.1
SLB	9253	2014	1	1	6	16	14	1	111	Ki3xOh7B	DRIL38.144	75	7	7	6	5	26	16	6.2
SLB	9255	2014	1	1	6	16	16	1	113	Ki3xOh7B	DRIL38.109	75	7.5	6.5	5	4	26	10	5.6
SLB	9256	2014	1	1	6	16	17	1	114	Ki3xOh7B	DRIL38.177	NA	NA	NA	NA	NA	NA	NA	NA
SLB	9257	2014	1	1	7	16	18	1	115	Ki3xOh7B	DRIL38.094	72	7.5	7	5	1	23	6	5
SLB	9258	2014	1	1	7	16	19	1	116	Ki3xOh7B	DRIL38.221	74	7	7	5	2	18	4	5.2
SLB	9259	2014	1	1	7	16	20	1	117	Ki3xOh7B	DRIL38.155	75	8	6	5.5	4	32	22	5.7
SLB	9260	2014	1	1	7	16	21	1	118	Ki3xOh7B	DRIL38.168	71	8	7	6	3	22	6	5.9
SLB	9261	2014	1	1	7	16	22	1	119	Ki3xOh7B	DRIL38.170	75	8	8	7	7	NA	2	7.4
SLB	9262	2014	1	1	7	16	23	1	120	Ki3xOh7B	DRIL38.082	75	8	7.5	7	6	29	14	7.1
SLB	9263	2014	1	1	7	16	24	1	121	Ki3xOh7B	DRIL38.216	70	7.5	7.5	6	5	26	12	6.4
SLB	9265	2014	1	1	7	16	26	1	123	Ki3xOh7B	DRIL38.149	74	7.5	7.5	6.5	5.5	32	20	6.7
SLB	9267	2014	1	1	7	16	28	1	125	Ki3xOh7B	DRIL38.048	75	7.5	7.5	6.5	4	26	10	6.4
SLB	9268	2014	1	1	7	17	28	1	126	Ki3xOh7B	DRIL38.033	72	7.5	7.5	6	4	22	12	6.2
SLB	9269	2014	1	1	7	17	27	1	127	Ki3xOh7B	DRIL38.051	75	7.5	6	5	4	24	12	5.4
SLB	9270	2014	1	1	7	17	26	1	128	Ki3xOh7B	DRIL38.095	75	7.5	7	6	3	29	18	5.8
SLB	9274	2014	1	1	7	17	22	1	132	Ki3xOh7B	DRIL38.065	NA	NA	NA	NA	NA	NA	NA	NA
SLB	9276	2014	1	1	8	17	20	1	134	Ki3xOh7B	DRIL38.162	75	7.5	7.5	6	5	26	15	6.4
SLB	9277	2014	1	1	8	17	19	1	135	Ki3xOh7B	DRIL38.097	74	7.5	7	6	3.5	26	8	5.9
SLB	9278	2014	1	1	8	17	18	1	136	Ki3xOh7B	DRIL38.004	75	7	6	5	3.5	NA	2	5.2
SLB	9279	2014	1	1	8	17	17	1	137	Ki3xOh7B	DRIL38.147	75	7.5	7	6	3.5	26	4	5.9
SLB	9280	2014	1	1	8	17	16	1	138	Ki3xOh7B	DRIL38.046	75	7	6	5	3.5	NA	56	5.2
SLB	9282	2014	1	1	8	17	14	1	140	Ki3xOh7B	DRIL38.063	75	7	7	6	4.5	NA	12	6.1
SLB	9283	2014	1	1	8	17	13	1	141	Ki3xOh7B	DRIL38.206	74	8	7.5	7	5.5	22	16	7
SLB	9284	2014	1	1	8	17	12	1	142	Ki3xOh7B	DRIL38.026	75	7.5	7	6	4	26	20	6.1
SLB	9285	2014	1	1	8	17	11	1	143	Ki3xOh7B	DRIL38.090	75	7.5	7	6	5	25	8	6.3
SLB	9287	2014	1	1	8	17	9	1	145	Ki3xOh7B	DRIL38.011	75	7	7	6	5	28	15	6.2
SLB	9288	2014	1	1	8	17	8	1	146	Ki3xOh7B	DRIL38.085	75	7.5	7.5	6.5	4	38	25	6.4
SLB	9289	2014	1	1	8	17	7	1	147	Ki3xOh7B	DRIL38.057	75	7.5	7	7	4	30	13	6.4
SLB	9291	2014	1	1	8	17	5	1	149	Ki3xOh7B	DRIL38.080	72	8	8	7.5	7.5	36	26	7.7
SLB	9293	2014	1	1	8	17	3	1	151	Ki3xOh7B	DRIL38.228	73	7.5	7.5	7	5.5	36	26	6.9
SLB	9294	2014	1	1	8	17	2	1	152	Ki3xOh7B	DRIL38.193	72	7.5	7.5	6	4.5	42	30	6.3
SLB	9296	2014	1	1	9	18	1	1	154	Ki3xOh7B	DRIL38.127	72	7.5	7	6	4	4	39	6.1
SLB	9297	2014	1	1	9	18	2	1	155	Ki3xOh7B	DRIL38.105	69	7.5	7	6	5	44	27	6.3
SLB	9298	2014	1	1	9	18	3	1	156	Ki3xOh7B	DRIL38.070	69	7	7	6	4	42	30	6
SLB	9299	2014	1	1	9	18	4	1	157	Ki3xOh7B	DRIL38.185	69	7.5	7	6.5	5.5	3	30	6.6
SLB	9300	2014	1	1	9	18	5	1	158	Ki3xOh7B	DRIL38.143	69	7.5	7.5	6.5	4	42	27	6.4
SLB	9301	2014	1	1	9	18	6	1	159	Ki3xOh7B	DRIL38.081	69	7.5	7.5	6.5	5	39	22	6.6
SLB	9304	2014	1	1	9	18	9	1	162	Ki3xOh7B	DRIL38.148	75	7	7	6	4	32	16	6
SLB	9306	2014	1	1	9	18	11	1	164	Ki3xOh7B	DRIL38.084	74	7.5	7.5	7	6	28	22	7
SLB	9307	2014	1	1	9	18	12	1	165	Ki3xOh7B	DRIL38.123	69	7.5	7.5	7	5	36	30	6.8
SLB	9308	2014	1	1	9	18	13	1	166	Ki3xOh7B	DRIL38.027	70	7.5	7.5	7	5	38	27	6.8
SLB	9310	2014	1	1	9	18	15	1	168	Ki3xOh7B	DRIL38.028	73	7.5	7.5	6	5	28	13	6.4
SLB	9311	2014	1	1	9	18	16	1	169	Ki3xOh7B	DRIL38.079	73	7.5	6	5	4.5	28	16	5.5
SLB	9312	2014	1	1	9	18	17	1	170	Ki3xOh7B	DRIL38.116	75	7	6	5	3	25	17	5.1
SLB	9313	2014	1	1	9	18	18	1	171	Ki3xOh7B	DRIL38.156	75	7.5	7.5	6	4	24	12	6.2
SLB	9314	2014	1	1	10	18	19	1	172	Ki3xOh7B	DRIL38.217	75	7.5	7	6	4	31	14	6.1
SLB	9315	2014	1	1	10	18	20	1	173	Ki3xOh7B	DRIL38.074	75	7.5	7	6	5	29	20	6.3
SLB	9316	2014	1	1	10	18	21	1	174	Ki3xOh7B	DRIL38.056	73	7.5	7.5	6	3	29	14	6
SLB	9317	2014	1	1	10	18	22	1	175	Ki3xOh7B	DRIL38.226	75	7.5	7.5	6	4	24	12	6.2
SLB	9319	2014	1	1	10	18	24	1	177	Ki3xOh7B	DRIL38.025	75	7.5	7	6	4	26	6	6.1
SLB	9321	2014	1	1	10	18	26	1	179	Ki3xOh7B	DRIL38.189	NA	NA	NA	NA	NA	NA	NA	NA
SLB	9322	2014	1	1	10	18	27	1	180	Ki3xOh7B	DRIL38.088	75	8	7	6	4	NA	59	6.1
SLB	9323	2014	1	1	10	18	28	1	181	Ki3xOh7B	DRIL38.043	75	8	7	6	4	22	59	6.1
SLB	9324	2014	1	1	10	19	28	1	182	Ki3xOh7B	DRIL38.142	75	7.5	7	6	4	30	14	6.1
SLB	9326	2014	1	1	10	19	26	1	184	Ki3xOh7B	DRIL38.069	75	7.5	7	6	4	NA	6	6.1
SLB	9327	2014	1	1	10	19	25	1	185	Ki3xOh7B	DRIL38.192	74	7.5	7.5	6.5	5	26	10	6.6
SLB	9329	2014	1	1	10	19	23	1	187	Ki3xOh7B	DRIL38.126	75	7.5	7.5	5.5	5	36	25	6.2
SLB	9330	2014	1	1	10	19	22	1	188	Ki3xOh7B	DRIL38.016	72	7.5	7	6	4	33	18	6.1
SLB	9331	2014	1	1	10	19	21	1	189	Ki3xOh7B	DRIL38.021	72	8	7.5	6	4	34	22	6.3
SLB	9332	2014	1	1	10	19	20	1	190	Ki3xOh7B	DRIL38.128	70	7.5	6.5	5	1	30	18	4.9
SLB	9333	2014	1	1	11	19	19	1	191	Ki3xOh7B	DRIL38.034	72	7.5	7	5.5	4	37	25	5.9
SLB	9335	2014	1	1	11	19	17	1	193	Ki3xOh7B	DRIL38.009	75	7.5	7.5	6.5	4	40	26	6.4
SLB	9336	2014	1	1	11	19	16	1	194	Ki3xOh7B	DRIL38.175	75	8	7.5	6.5	6.5	32	20	7
SLB	9338	2014	1	1	11	19	14	1	196	Ki3xOh7B	DRIL38.129	73	8	7.5	7	4	40	18	6.6
SLB	9339	2014	1	1	11	19	13	1	197	Ki3xOh7B	DRIL38.158	67	8.5	7.5	7	6	34	28	7.1
SLB	9340	2014	1	1	11	19	12	1	198	Ki3xOh7B	DRIL38.062	70	7.5	7.5	5.5	4	38	25	6
SLB	9342	2014	1	1	11	19	10	1	200	Ki3xOh7B	DRIL38.001	68	7.5	7.5	7	5.5	3	34	6.9
SLB	9343	2014	1	1	11	19	9	1	201	Ki3xOh7B	DRIL38.060	72	7.5	7.5	6	5.5	39	27	6.5
SLB	9344	2014	1	1	11	19	8	1	202	Ki3xOh7B	DRIL38.154	73	8	7	6.5	3	34	26	6.1
SLB	9345	2014	1	1	11	19	7	1	203	Ki3xOh7B	DRIL38.044	70	7.5	7	6.5	5	42	36	6.5
SLB	9346	2014	1	1	11	19	6	1	204	Ki3xOh7B	DRIL38.022	66	8	7	6	4	33	30	6.1
SLB	9347	2014	1	1	11	19	5	1	205	Ki3xOh7B	DRIL38.125	64	7.5	7.5	6.5	4.5	42	31	6.5
SLB	9348	2014	1	1	11	19	4	1	206	Ki3xOh7B	DRIL38.176	70	8.5	8	7	6	37	18	7.3
SLB	9349	2014	1	1	11	19	3	1	207	Ki3xOh7B	DRIL38.153	67	7	7	5.5	2	30	26	5.4
SLB	9350	2014	1	1	11	19	2	1	208	Ki3xOh7B	DRIL38.091	69	7	7	5	3	5	43	5.4
SLB	9352	2014	1	1	12	20	1	1	210	Ki3xOh7B	DRIL38.220	70	7.5	7.5	7	5.5	4	39	6.9
SLB	9353	2014	1	1	12	20	2	1	211	Ki3xOh7B	DRIL38.075	66	7.5	7	6	5	5	45	6.3
SLB	9354	2014	1	1	12	20	3	1	212	Ki3xOh7B	DRIL38.107	66	7	6	5	1	9	39	4.7
SLB	9355	2014	1	1	12	20	4	1	213	Ki3xOh7B	DRIL38.146	67	7	6	5	1	10	45	4.7
SLB	9356	2014	1	1	12	20	5	1	214	Ki3xOh7B	DRIL38.211	66	8	7.5	7	5.5	42	41	7
SLB	9358	2014	1	1	12	20	7	1	216	Ki3xOh7B	DRIL38.052	69	7.5	7	6	3	5	31	5.8
SLB	9361	2014	1	1	12	20	10	1	219	Ki3xOh7B	DRIL38.208	66	8	7.5	7	5	41	26	6.8
SLB	9364	2014	1	1	12	20	13	1	222	Ki3xOh7B	DRIL38.183	66	8	7.5	6	4	44	27	6.3
SLB	9365	2014	1	1	12	20	14	1	223	Ki3xOh7B	DRIL38.096	70	7.5	7.5	6	4	3	35	6.2
SLB	9366	2014	1	1	12	20	15	1	224	Ki3xOh7B	DRIL38.023	67	8	7.5	7	5	3	34	6.8
SLB	9368	2014	1	1	12	20	17	1	226	Ki3xOh7B	DRIL38.180	73	8.5	7	5	5	37	30	6.1
SLB	9369	2014	1	1	12	20	18	1	227	Ki3xOh7B	DRIL38.195	72	8.5	8	7	6	40	25	7.3
SLB	9370	2014	1	1	12	20	19	1	228	Ki3xOh7B	DRIL38.139	72	7.5	7	5.5	4	33	17	5.9
SLB	9371	2014	1	1	13	20	20	1	229	Ki3xOh7B	DRIL38.134	73	7.5	7	6	4	34	18	6.1
SLB	9373	2014	1	1	13	20	22	1	231	Ki3xOh7B	DRIL38.019	74	7.5	7	5.5	3	34	19	5.7
SLB	9374	2014	1	1	13	20	23	1	232	Ki3xOh7B	DRIL38.072	70	7.5	7	6	4	34	22	6.1
SLB	9375	2014	1	1	13	20	24	1	233	Ki3xOh7B	DRIL38.205	75	7.5	7	6	4	26	16	6.1
SLB	9376	2014	1	1	13	20	25	1	234	Ki3xOh7B	DRIL38.030	75	8	7.5	6	4	24	6	6.3
SLB	9377	2014	1	1	13	20	26	1	235	Ki3xOh7B	DRIL38.203	75	8	7.5	6	4	27	10	6.3
SLB	9378	2014	1	1	13	20	27	1	236	Ki3xOh7B	DRIL38.225	75	7.5	7.5	6	5	30	13	6.4
SLB	9380	2014	1	1	13	21	28	1	238	Ki3xOh7B	DRIL38.210	75	7.5	7.5	6	5	22	8	6.4
SLB	9381	2014	1	1	13	21	27	1	239	Ki3xOh7B	DRIL38.031	75	8	7	6	5	33	23	6.3
SLB	9382	2014	1	1	13	21	26	1	240	Ki3xOh7B	DRIL38.112	75	8	7	6	5	NA	6	6.3
SLB	9383	2014	1	1	13	21	25	1	241	Ki3xOh7B	DRIL38.045	75	8	7.5	6	5	31	16	6.5
SLB	9384	2014	1	1	13	21	24	1	242	Ki3xOh7B	DRIL38.029	75	7.5	7	6	5	42	18	6.3
SLB	9385	2014	1	1	13	21	23	1	243	Ki3xOh7B	DRIL38.106	69	7.5	7	5.5	3	40	30	5.7
SLB	9386	2014	1	1	13	21	22	1	244	Ki3xOh7B	DRIL38.047	73	8	7.5	7	5.5	42	19	7
SLB	9388	2014	1	1	13	21	20	1	246	Ki3xOh7B	DRIL38.202	73	7.5	7.5	6.5	5	40	27	6.6
SLB	9389	2014	1	1	13	21	19	1	247	Ki3xOh7B	DRIL38.108	69	7.5	7.5	7	5.5	6	41	6.9
SLB	9390	2014	1	1	14	21	18	1	248	Ki3xOh7B	DRIL38.114	72	7.5	7.5	6.5	5	4	37	6.6
SLB	9391	2014	1	1	14	21	17	1	249	Ki3xOh7B	DRIL38.163	70	7.5	6	4.5	2	34	32	4.8
SLB	9392	2014	1	1	14	21	16	1	250	Ki3xOh7B	DRIL38.104	71	7.5	7	4	2	42	33	4.9
SLB	9393	2014	1	1	14	21	15	1	251	Ki3xOh7B	DRIL38.184	68	7.5	7.5	6	4	42	26	6.2
SLB	9395	2014	1	1	14	21	13	1	253	Ki3xOh7B	DRIL38.199	66	7.5	7	6	5	36	32	6.3
SLB	9396	2014	1	1	14	21	12	1	254	Ki3xOh7B	DRIL38.132	67	7.5	7	6	3	45	41	5.8
SLB	9398	2014	1	1	14	21	10	1	256	Ki3xOh7B	DRIL38.201	66	8	7.5	7.5	6.5	13	47	7.4
SLB	9400	2014	1	1	14	21	8	1	258	Ki3xOh7B	DRIL38.111	69	7.5	7	6	4	3	40	6.1
SLB	9401	2014	1	1	14	21	7	1	259	Ki3xOh7B	DRIL38.157	69	7.5	6	5	2	42	27	5
SLB	9402	2014	1	1	14	21	6	1	260	Ki3xOh7B	DRIL38.101	66	7.5	7.5	6	3	8	46	6
SLB	9403	2014	1	1	14	21	5	1	261	Ki3xOh7B	DRIL38.130	68	7.5	7	6	5	44	41	6.3
SLB	9404	2014	1	1	14	21	4	1	262	Ki3xOh7B	DRIL38.078	70	7	7.5	6	5	5	40	6.3
SLB	9406	2014	1	1	14	21	2	1	264	Ki3xOh7B	DRIL38.187	66	7.5	7	6	4	3	44	6.1
SLB	9407	2014	1	1	14	21	1	1	265	Ki3xOh7B	DRIL38.223	67	8	8	7.5	6	36	34	7.4
SLB	9408	2014	1	1	14	22	1	1	266	Ki3xOh7B	DRIL38.008	70	7.5	7	5.5	3	44	34	5.7
SLB	12626	2014	1	2	1	14	8	1	267	Ki3xOh7B	DRIL38.006	73	7.5	7	5.5	4	36	25	6.1
SLB	12627	2014	1	2	1	14	9	1	268	Ki3xOh7B	DRIL38.103	73	7	5	5	2	38	29	4.8
SLB	12628	2014	1	2	1	14	10	1	269	Ki3xOh7B	DRIL38.107	70	6.5	5	4	1	37	24	4.3
SLB	12629	2014	1	2	1	14	11	1	270	Ki3xOh7B	DRIL38.181	73	7	6	2	1	NA	14	4
SLB	12630	2014	1	2	1	14	12	1	271	Ki3xOh7B	DRIL38.011	73	7	5	3	1	36	32	4
SLB	12632	2014	1	2	1	14	14	1	273	Ki3xOh7B	DRIL38.030	70	6	5	4	1	42	30	4.2
SLB	12634	2014	1	2	1	14	16	1	275	Ki3xOh7B	DRIL38.079	73	7	5.5	3	1	29	17	4.2
SLB	12635	2014	1	2	1	14	17	1	276	Ki3xOh7B	DRIL38.052	73	7	6.5	4	1	39	18	4.8
SLB	12637	2014	1	2	1	14	19	1	278	Ki3xOh7B	DRIL38.060	75	6	5	4.5	1	30	13	4.3
SLB	12638	2014	1	2	1	14	20	1	279	Ki3xOh7B	DRIL38.113	73	6.5	6	4	1	31	11	4.6
SLB	12640	2014	1	2	1	14	22	1	281	Ki3xOh7B	DRIL38.226	73	7.5	6.5	5	4	27	8	5.8
SLB	12641	2014	1	2	1	14	23	1	282	Ki3xOh7B	DRIL38.230	73	8	7.5	7.5	7	26	60	7.5
SLB	12642	2014	1	2	1	14	24	1	283	Ki3xOh7B	DRIL38.133	71	8	7	5	4	34	18	6
SLB	12643	2014	1	2	1	15	24	1	284	Ki3xOh7B	DRIL38.008	71	8	7	6.5	5	26	10	6.7
SLB	12644	2014	1	2	1	15	23	1	285	Ki3xOh7B	DRIL38.194	NA	7	7	7	5.5	28	13	6.8
SLB	12645	2014	1	2	2	15	22	1	286	Ki3xOh7B	DRIL38.222	NA	8	7	5	3	NA	54	5.8
SLB	12646	2014	1	2	2	15	21	1	287	Ki3xOh7B	DRIL38.162	NA	7.5	7	5	4	26	6	5.9
SLB	12647	2014	1	2	2	15	20	1	288	Ki3xOh7B	DRIL38.220	73	7	7	6	4	31	11	6.2
SLB	12648	2014	1	2	2	15	19	1	289	Ki3xOh7B	DRIL38.014	73	7.5	6.5	5	1	31	12	5.3
SLB	12649	2014	1	2	2	15	18	1	290	Ki3xOh7B	DRIL38.043	73	6	5.5	3	1	26	9	4
SLB	12650	2014	1	2	2	15	17	1	291	Ki3xOh7B	DRIL38.037	73	6.5	6	5	4	32	18	5.4
SLB	12651	2014	1	2	2	15	16	1	292	Ki3xOh7B	DRIL38.104	70	6.5	5	3	1	36	19	3.9
SLB	12653	2014	1	2	2	15	14	1	294	Ki3xOh7B	DRIL38.058	71	6.5	6	5	2	38	22	5.1
SLB	12654	2014	1	2	2	15	13	1	295	Ki3xOh7B	DRIL38.183	68	7	6	2	1	30	22	4
SLB	12655	2014	1	2	2	15	12	1	296	Ki3xOh7B	DRIL38.086	74	7	6	4	1	34	13	4.7
SLB	12656	2014	1	2	2	15	11	1	297	Ki3xOh7B	DRIL38.203	70	7	6.5	5	2	36	20	5.3
SLB	12658	2014	1	2	2	15	9	1	299	Ki3xOh7B	DRIL38.120	73	7	6	3	1	34	27	4.3
SLB	12659	2014	1	2	2	15	8	1	300	Ki3xOh7B	DRIL38.185	72	8.5	7	5.5	3.5	40	26	6.2
SLB	12660	2014	1	2	2	15	7	1	301	Ki3xOh7B	DRIL38.034	70	8	6.5	3	2	35	25	4.8
SLB	12662	2014	1	2	2	15	5	1	303	Ki3xOh7B	DRIL38.209	70	8	7.5	6.5	3.5	40	25	6.6
SLB	12663	2014	1	2	2	15	4	1	304	Ki3xOh7B	DRIL38.187	71	8	7	5	4	36	26	6
SLB	12664	2014	1	2	3	15	3	1	305	Ki3xOh7B	DRIL38.214	72	6	5.5	3.5	1	37	23	4.2
SLB	12665	2014	1	2	3	15	2	1	306	Ki3xOh7B	DRIL38.184	71	6	5.5	3	1	33	5	4
SLB	12667	2014	1	2	3	16	1	1	308	Ki3xOh7B	DRIL38.053	71	7	6	5	3	40	30	5.3
SLB	12670	2014	1	2	3	16	4	1	311	Ki3xOh7B	DRIL38.016	73	7.5	7	5	2	31	22	5.6
SLB	12671	2014	1	2	3	16	5	1	312	Ki3xOh7B	DRIL38.145	NA	NA	NA	NA	NA	NA	NA	NA
SLB	12672	2014	1	2	3	16	6	1	313	Ki3xOh7B	DRIL38.015	72	6.5	5	3	1	39	27	3.9
SLB	12674	2014	1	2	3	16	8	1	315	Ki3xOh7B	DRIL38.070	69	7	6	5	2	32	18	5.2
SLB	12676	2014	1	2	3	16	10	1	317	Ki3xOh7B	DRIL38.004	71	6.5	5.5	4.5	1	37	31	4.6
SLB	12677	2014	1	2	3	16	11	1	318	Ki3xOh7B	DRIL38.190	73	7.5	7	6	4	41	33	6.3
SLB	12678	2014	1	2	3	16	12	1	319	Ki3xOh7B	DRIL38.045	73	7	7	6	3	40	21	6
SLB	12679	2014	1	2	3	16	13	1	320	Ki3xOh7B	DRIL38.138	73	6	5	5	1	36	20	4.5
SLB	12680	2014	1	2	3	16	14	1	321	Ki3xOh7B	DRIL38.051	70	6.5	5	5	2	36	20	4.8
SLB	12681	2014	1	2	3	16	15	1	322	Ki3xOh7B	DRIL38.189	73	6.5	6	4.5	1	32	22	4.8
SLB	12682	2014	1	2	3	16	16	1	323	Ki3xOh7B	DRIL38.112	73	6.5	6.5	4.5	2	36	22	5.1
SLB	12683	2014	1	2	4	16	17	1	324	Ki3xOh7B	DRIL38.175	74	7	6.5	6	4	30	11	6
SLB	12684	2014	1	2	4	16	18	1	325	Ki3xOh7B	DRIL38.131	NA	NA	NA	NA	NA	NA	NA	NA
SLB	12685	2014	1	2	4	16	19	1	326	Ki3xOh7B	DRIL38.170	NA	NA	NA	NA	NA	NA	NA	NA
SLB	12687	2014	1	2	4	16	21	1	328	Ki3xOh7B	DRIL38.021	78	6.5	6.5	5	4	26	4	5.6
SLB	12688	2014	1	2	4	16	22	1	329	Ki3xOh7B	DRIL38.093	78	7	7	5.5	3	24	4	5.8
SLB	12690	2014	1	2	4	16	24	1	331	Ki3xOh7B	DRIL38.071	75	6	6	5	2	28	4	5
SLB	12692	2014	1	2	4	17	23	1	333	Ki3xOh7B	DRIL38.084	75	8	7	7	5	NA	19	6.8
SLB	12694	2014	1	2	4	17	21	1	335	Ki3xOh7B	DRIL38.101	NA	NA	NA	NA	NA	NA	NA	NA
SLB	12695	2014	1	2	4	17	20	1	336	Ki3xOh7B	DRIL38.159	75	7	6	5	2	34	11	5.2
SLB	12696	2014	1	2	4	17	19	1	337	Ki3xOh7B	DRIL38.080	75	7	7	5	2	30	7	5.5
SLB	12697	2014	1	2	4	17	18	1	338	Ki3xOh7B	DRIL38.186	67	6	5	5	2	30	15	4.7
SLB	12698	2014	1	2	4	17	17	1	339	Ki3xOh7B	DRIL38.146	75	5.5	5	4	1	30	17	4.1
SLB	12699	2014	1	2	4	17	16	1	340	Ki3xOh7B	DRIL38.025	69	7	6.5	5	1	34	21	5.2
SLB	12700	2014	1	2	4	17	15	1	341	Ki3xOh7B	DRIL38.077	70	7	6	5	2	39	21	5.2
SLB	12701	2014	1	2	4	17	14	1	342	Ki3xOh7B	DRIL38.083	68	6.5	5.5	4	1	35	20	4.4
SLB	12702	2014	1	2	5	17	13	1	343	Ki3xOh7B	DRIL38.009	72	6	6	3.5	1	34	27	4.3
SLB	12703	2014	1	2	5	17	12	1	344	Ki3xOh7B	DRIL38.050	71	7.5	7	6	4	37	38	6.3
SLB	12704	2014	1	2	5	17	11	1	345	Ki3xOh7B	DRIL38.035	71	8	7.5	7	5.5	40	31	7.1
SLB	12705	2014	1	2	5	17	10	1	346	Ki3xOh7B	DRIL38.224	73	7	6.5	6	2	32	28	5.7
SLB	12706	2014	1	2	5	17	9	1	347	Ki3xOh7B	DRIL38.007	74	7	7	5.5	3	5	26	5.8
SLB	12708	2014	1	2	5	17	7	1	349	Ki3xOh7B	DRIL38.195	70	7	7.5	5.5	4	35	25	6.2
SLB	12710	2014	1	2	5	17	5	1	351	Ki3xOh7B	DRIL38.114	73	6	5	4.5	2	34	19	4.5
SLB	12712	2014	1	2	5	17	3	1	353	Ki3xOh7B	DRIL38.142	73	6	6	5	2	37	25	5
SLB	12713	2014	1	2	5	17	2	1	354	Ki3xOh7B	DRIL38.068	72	7	6.5	5	2	32	13	5.3
SLB	12714	2014	1	2	5	17	1	1	355	Ki3xOh7B	DRIL38.188	69	7.5	6.5	5	4	28	23	5.8
SLB	12715	2014	1	2	5	18	1	1	356	Ki3xOh7B	DRIL38.205	74	5.5	5	3	1	38	27	3.8
SLB	12716	2014	1	2	5	18	2	1	357	Ki3xOh7B	DRIL38.191	74	7	6	5	3	34	19	5.3
SLB	12717	2014	1	2	5	18	3	1	358	Ki3xOh7B	DRIL38.048	74	6	6	5	1	37	22	4.8
SLB	12718	2014	1	2	5	18	4	1	359	Ki3xOh7B	DRIL38.141	74	6	6	5	1	42	33	4.8
SLB	12719	2014	1	2	5	18	5	1	360	Ki3xOh7B	DRIL38.193	75	7.5	7	6.5	5	36	32	6.6
SLB	12720	2014	1	2	5	18	6	1	361	Ki3xOh7B	DRIL38.116	71	6.5	5.5	4	2	41	35	4.6
SLB	12722	2014	1	2	6	18	8	1	363	Ki3xOh7B	DRIL38.227	71	6.5	6	5	4	36	30	5.4
SLB	12723	2014	1	2	6	18	9	1	364	Ki3xOh7B	DRIL38.012	67	7.5	6.5	5	2	36	35	5.4
SLB	12724	2014	1	2	6	18	10	1	365	Ki3xOh7B	DRIL38.063	75	6	5.5	4.5	1	34	23	4.5
SLB	12725	2014	1	2	6	18	11	1	366	Ki3xOh7B	DRIL38.105	73	7	6	5	3	40	23	5.3
SLB	12728	2014	1	2	6	18	14	1	369	Ki3xOh7B	DRIL38.026	71	6	5	4	1	39	27	4.2
SLB	12729	2014	1	2	6	18	15	1	370	Ki3xOh7B	DRIL38.089	71	6	5	4	1	32	20	4.2
SLB	12731	2014	1	2	6	18	17	1	372	Ki3xOh7B	DRIL38.074	70	5.5	5	4	1	36	25	4.1
SLB	12732	2014	1	2	6	18	18	1	373	Ki3xOh7B	DRIL38.139	73	6	6	4	1	40	18	4.5
SLB	12733	2014	1	2	6	18	19	1	374	Ki3xOh7B	DRIL38.197	75	6	5	3	1	29	10	3.8
SLB	12734	2014	1	2	6	18	20	1	375	Ki3xOh7B	DRIL38.172	75	7	6	5	4	NA	59	5.5
SLB	12735	2014	1	2	6	18	21	1	376	Ki3xOh7B	DRIL38.216	NA	NA	NA	NA	NA	20	54	NA
SLB	12736	2014	1	2	6	18	22	1	377	Ki3xOh7B	DRIL38.108	75	7.5	7	6	4	26	6	6.3
SLB	12737	2014	1	2	6	18	23	1	378	Ki3xOh7B	DRIL38.158	75	8	7	6	4	28	7	6.3
SLB	12738	2014	1	2	6	18	24	1	379	Ki3xOh7B	DRIL38.178	74	7.5	7	6	4	34	19	6.3
SLB	12742	2014	1	2	7	19	21	1	383	Ki3xOh7B	DRIL38.147	74	7.5	6	5	3.5	26	60	5.5
SLB	12744	2014	1	2	7	19	19	1	385	Ki3xOh7B	DRIL38.128	NA	NA	NA	NA	NA	NA	NA	NA
SLB	12745	2014	1	2	7	19	18	1	386	Ki3xOh7B	DRIL38.003	69	6.5	6	5	2	34	14	5.1
SLB	12746	2014	1	2	7	19	17	1	387	Ki3xOh7B	DRIL38.223	73	6.5	6	5	2	24	9	5.1
SLB	12747	2014	1	2	7	19	16	1	388	Ki3xOh7B	DRIL38.169	67	6.5	5.5	4	1	37	22	4.4
SLB	12748	2014	1	2	7	19	15	1	389	Ki3xOh7B	DRIL38.094	66	5	3	1	1	30	19	2.3
SLB	12751	2014	1	2	7	19	12	1	392	Ki3xOh7B	DRIL38.180	73	7.5	7	5	3	34	22	5.8
SLB	12753	2014	1	2	7	19	10	1	394	Ki3xOh7B	DRIL38.198	74	7.5	6.5	5	1	38	15	5.3
SLB	12754	2014	1	2	7	19	9	1	395	Ki3xOh7B	DRIL38.152	69	5.5	5	2	1	40	23	3.4
SLB	12755	2014	1	2	7	19	8	1	396	Ki3xOh7B	DRIL38.054	69	7	6	5.5	3.5	38	27	5.6
SLB	12756	2014	1	2	7	19	7	1	397	Ki3xOh7B	DRIL38.072	69	7	6	4.5	1	32	23	4.8
SLB	12757	2014	1	2	7	19	6	1	398	Ki3xOh7B	DRIL38.109	71	6.5	6	4.5	2	40	28	4.9
SLB	12758	2014	1	2	7	19	5	1	399	Ki3xOh7B	DRIL38.129	74	7	7	5.5	3	40	23	5.8
SLB	12759	2014	1	2	8	19	4	1	400	Ki3xOh7B	DRIL38.157	73	6.5	6.5	5.5	2	33	21	5.4
SLB	12760	2014	1	2	8	19	3	1	401	Ki3xOh7B	DRIL38.217	68	6.5	6	4	2	38	28	4.8
SLB	12761	2014	1	2	8	19	2	1	402	Ki3xOh7B	DRIL38.044	72	6	5.5	5	2	34	21	4.8
SLB	12762	2014	1	2	8	19	1	1	403	Ki3xOh7B	DRIL38.106	67	5.5	5	3	1	34	20	3.8
SLB	12763	2014	1	2	8	20	1	1	404	Ki3xOh7B	DRIL38.033	67	7	5	4	1	30	19	4.3
SLB	12764	2014	1	2	8	20	2	1	405	Ki3xOh7B	DRIL38.055	74	6.5	6	5.5	3.5	41	28	5.5
SLB	12766	2014	1	2	8	20	4	1	407	Ki3xOh7B	DRIL38.059	73	7.5	7.5	6	4	3	20	6.4
SLB	12767	2014	1	2	8	20	5	1	408	Ki3xOh7B	DRIL38.019	75	6.5	7	5	3	40	26	5.6
SLB	12772	2014	1	2	8	20	10	1	413	Ki3xOh7B	DRIL38.211	67	7.5	7	5	2	36	30	5.6
SLB	12774	2014	1	2	8	20	12	1	415	Ki3xOh7B	DRIL38.196	73	6.5	6.5	4.5	1	35	17	4.9
SLB	12775	2014	1	2	8	20	13	1	416	Ki3xOh7B	DRIL38.097	71	6.5	6.5	5	3	34	26	5.4
SLB	12776	2014	1	2	8	20	14	1	417	Ki3xOh7B	DRIL38.024	71	6	6	4	1	36	30	4.5
SLB	12777	2014	1	2	8	20	15	1	418	Ki3xOh7B	DRIL38.028	71	6	5	3.5	1	36	26	4
SLB	12779	2014	1	2	9	20	17	1	420	Ki3xOh7B	DRIL38.177	73	7	6.5	5.5	4	34	14	5.8
SLB	12780	2014	1	2	9	20	18	1	421	Ki3xOh7B	DRIL38.010	71	7.5	6.5	5	2	34	18	5.4
SLB	12781	2014	1	2	9	20	19	1	422	Ki3xOh7B	DRIL38.056	75	7	6	5	1	NA	56	5
SLB	12782	2014	1	2	9	20	20	1	423	Ki3xOh7B	DRIL38.125	73	7.5	7.5	6.5	4	28	8	6.6
SLB	12784	2014	1	2	9	20	22	1	425	Ki3xOh7B	DRIL38.066	NA	NA	NA	NA	NA	NA	NA	NA
SLB	12786	2014	1	2	9	20	24	1	427	Ki3xOh7B	DRIL38.149	NA	NA	NA	NA	NA	NA	NA	NA
SLB	12787	2014	1	2	9	21	24	1	428	Ki3xOh7B	DRIL38.219	NA	NA	NA	NA	NA	NA	NA	NA
SLB	12788	2014	1	2	9	21	23	1	429	Ki3xOh7B	DRIL38.179	NA	NA	NA	NA	NA	NA	NA	NA
SLB	12789	2014	1	2	9	21	22	1	430	Ki3xOh7B	DRIL38.041	NA	NA	NA	NA	NA	NA	NA	NA
SLB	12791	2014	1	2	9	21	20	1	432	Ki3xOh7B	DRIL38.148	75	7	7	5	2	30	12	5.5
SLB	12792	2014	1	2	9	21	19	1	433	Ki3xOh7B	DRIL38.208	75	7.5	7	5	4	29	8	5.9
SLB	12793	2014	1	2	9	21	18	1	434	Ki3xOh7B	DRIL38.057	75	7	6	4	1	34	19	4.7
SLB	12794	2014	1	2	9	21	17	1	435	Ki3xOh7B	DRIL38.091	74	6	6	4	1	36	18	4.5
SLB	12795	2014	1	2	9	21	16	1	436	Ki3xOh7B	DRIL38.078	74	6	6	4.5	1	32	13	4.7
SLB	12796	2014	1	2	9	21	15	1	437	Ki3xOh7B	DRIL38.210	70	6	5	2	1	32	25	3.5
SLB	12797	2014	1	2	10	21	14	1	438	Ki3xOh7B	DRIL38.127	73	6.5	6	5	1	42	31	4.9
SLB	12798	2014	1	2	10	21	13	1	439	Ki3xOh7B	DRIL38.031	73	6	6	5	2	37	31	5
SLB	12799	2014	1	2	10	21	12	1	440	Ki3xOh7B	DRIL38.017	67	7	6	5	2	36	26	5.2
SLB	12800	2014	1	2	10	21	11	1	441	Ki3xOh7B	DRIL38.075	71	7	7	5	3	42	34	5.7
SLB	12801	2014	1	2	10	21	10	1	442	Ki3xOh7B	DRIL38.192	69	7	7	6	4	40	34	6.2
SLB	12803	2014	1	2	10	21	8	1	444	Ki3xOh7B	DRIL38.168	66	7	6	4.5	1	28	19	4.8
SLB	12805	2014	1	2	10	21	6	1	446	Ki3xOh7B	DRIL38.064	71	7	6	3	1	38	19	4.3
SLB	12806	2014	1	2	10	21	5	1	447	Ki3xOh7B	DRIL38.171	73	7.5	7	6	4	35	22	6.3
SLB	12807	2014	1	2	10	21	4	1	448	Ki3xOh7B	DRIL38.160	74	7	7	6	3	42	32	6
SLB	12808	2014	1	2	10	21	3	1	449	Ki3xOh7B	DRIL38.143	73	6	5	4	1	36	18	4.2
SLB	12810	2014	1	2	10	21	1	1	451	Ki3xOh7B	DRIL38.176	73	7	6	5	2	26	7	5.2
SLB	12811	2014	1	2	10	22	1	1	452	Ki3xOh7B	DRIL38.137	70	6	5	3	1	32	14	3.8
SLB	12812	2014	1	2	10	22	2	1	453	Ki3xOh7B	DRIL38.090	73	6	5	3	1	40	19	3.8
SLB	12813	2014	1	2	10	22	3	1	454	Ki3xOh7B	DRIL38.040	67	6	5	2	1	36	15	3.5
SLB	12814	2014	1	2	10	22	4	1	455	Ki3xOh7B	DRIL38.061	73	6.5	6	4	1	36	31	4.6
SLB	12815	2014	1	2	10	22	5	1	456	Ki3xOh7B	DRIL38.199	68	6.5	5	4	1	30	7	4.3
SLB	12817	2014	1	2	11	22	7	1	458	Ki3xOh7B	DRIL38.067	73	6	6	3	1	38	25	4.2
SLB	12818	2014	1	2	11	22	8	1	459	Ki3xOh7B	DRIL38.231	66	7.5	6.5	5	3	37	33	5.6
SLB	12820	2014	1	2	11	22	10	1	461	Ki3xOh7B	DRIL38.038	70	5	4.5	3	1	40	22	3.5
SLB	12821	2014	1	2	11	22	11	1	462	Ki3xOh7B	DRIL38.062	73	7	6	4	1	39	25	4.7
SLB	12823	2014	1	2	11	22	13	1	464	Ki3xOh7B	DRIL38.047	75	6	6	5	2	3	27	5
SLB	12824	2014	1	2	11	22	14	1	465	Ki3xOh7B	DRIL38.229	69	6	5	4	2	38	31	4.3
SLB	12825	2014	1	2	11	22	15	1	466	Ki3xOh7B	DRIL38.049	67	5.5	4.5	3	1	37	30	3.6
SLB	12826	2014	1	2	11	22	16	1	467	Ki3xOh7B	DRIL38.134	71	5	4	2	1	34	22	3
SLB	12827	2014	1	2	11	22	17	1	468	Ki3xOh7B	DRIL38.088	73	5	5	2	1	35	18	3.3
SLB	12828	2014	1	2	11	22	18	1	469	Ki3xOh7B	DRIL38.156	75	6	5	3.5	1	38	23	4
SLB	12829	2014	1	2	11	22	19	1	470	Ki3xOh7B	DRIL38.085	NA	NA	NA	NA	NA	NA	NA	NA
SLB	12830	2014	1	2	11	22	20	1	471	Ki3xOh7B	DRIL38.111	NA	NA	NA	NA	NA	NA	NA	NA
SLB	12831	2014	1	2	11	22	21	1	472	Ki3xOh7B	DRIL38.166	NA	NA	NA	NA	NA	NA	NA	NA
SLB	12833	2014	1	2	11	22	23	1	474	Ki3xOh7B	DRIL38.218	NA	NA	NA	NA	NA	NA	NA	NA
SLB	12835	2014	1	2	12	23	24	1	476	Ki3xOh7B	DRIL38.119	NA	NA	NA	NA	NA	NA	NA	NA
SLB	12836	2014	1	2	12	23	23	1	477	Ki3xOh7B	DRIL38.082	NA	NA	NA	NA	NA	NA	NA	NA
SLB	12837	2014	1	2	12	23	22	1	478	Ki3xOh7B	DRIL38.122	NA	NA	NA	NA	NA	NA	NA	NA
SLB	12838	2014	1	2	12	23	21	1	479	Ki3xOh7B	DRIL38.154	NA	NA	NA	NA	NA	NA	NA	NA
SLB	12839	2014	1	2	12	23	20	1	480	Ki3xOh7B	DRIL38.123	NA	NA	NA	NA	NA	NA	NA	NA
SLB	12840	2014	1	2	12	23	19	1	481	Ki3xOh7B	DRIL38.163	NA	NA	NA	NA	NA	NA	NA	NA
SLB	12841	2014	1	2	12	23	18	1	482	Ki3xOh7B	DRIL38.206	70	8	7	5	2	36	30	5.7
SLB	12842	2014	1	2	12	23	17	1	483	Ki3xOh7B	DRIL38.110	73	8	7	6	3	42	25	6.2
SLB	12843	2014	1	2	12	23	16	1	484	Ki3xOh7B	DRIL38.117	69	6.5	5.5	4	1	32	23	4.4
SLB	12844	2014	1	2	12	23	15	1	485	Ki3xOh7B	DRIL38.020	70	6	5	3	1	30	31	3.8
SLB	12846	2014	1	2	12	23	13	1	487	Ki3xOh7B	DRIL38.221	73	6	5	2	1	24	26	3.5
SLB	12847	2014	1	2	12	23	12	1	488	Ki3xOh7B	DRIL38.202	72	7	7	5	4	36	22	5.8
SLB	12848	2014	1	2	12	23	11	1	489	Ki3xOh7B	DRIL38.232	65	7	6	4.5	1	32	15	4.8
SLB	12851	2014	1	2	12	23	8	1	492	Ki3xOh7B	DRIL38.136	73	6	5.5	4	2	36	27	4.5
SLB	12854	2014	1	2	13	23	5	1	495	Ki3xOh7B	DRIL38.130	70	6.5	5.5	4.5	1	38	16	4.6
SLB	12855	2014	1	2	13	23	4	1	496	Ki3xOh7B	DRIL38.126	74	6.5	6	4.5	1	43	36	4.8
SLB	12856	2014	1	2	13	23	3	1	497	Ki3xOh7B	DRIL38.151	73	7	6.5	4.5	1	36	22	5
SLB	12857	2014	1	2	13	23	2	1	498	Ki3xOh7B	DRIL38.036	73	7	6	4.5	2	34	20	5
SLB	12858	2014	1	2	13	23	1	1	499	Ki3xOh7B	DRIL38.018	71	6.5	6	4.5	2	39	26	4.9
SLB	12859	2014	1	2	13	24	1	1	500	Ki3xOh7B	DRIL38.115	73	6	6	4	2	38	26	4.7
SLB	12860	2014	1	2	13	24	2	1	501	Ki3xOh7B	DRIL38.144	73	6.5	6	3	1	34	28	4.3
SLB	12861	2014	1	2	13	24	3	1	502	Ki3xOh7B	DRIL38.065	70	6.5	6	5	2	38	32	5.1
SLB	12863	2014	1	2	13	24	5	1	504	Ki3xOh7B	DRIL38.032	71	7	6.5	5.5	4	3	38	5.8
SLB	12864	2014	1	2	13	24	6	1	505	Ki3xOh7B	DRIL38.023	69	7.5	6.5	5	3	38	27	5.6
SLB	12865	2014	1	2	13	24	7	1	506	Ki3xOh7B	DRIL38.046	71	6	4	1	1	28	11	2.8
SLB	12867	2014	1	2	13	24	9	1	508	Ki3xOh7B	DRIL38.167	69	6	5	3	1	36	26	3.8
SLB	12868	2014	1	2	13	24	10	1	509	Ki3xOh7B	DRIL38.153	70	5.5	5	3	1	39	26	3.8
SLB	12870	2014	1	2	13	24	12	1	511	Ki3xOh7B	DRIL38.029	72	6.5	6	5	3	4	30	5.3
SLB	12871	2014	1	2	13	24	13	1	512	Ki3xOh7B	DRIL38.027	73	6.5	6	3	1	40	28	4.3
SLB	12872	2014	1	2	13	24	14	1	513	Ki3xOh7B	DRIL38.150	68	7	6.5	5	3	38	27	5.5
SLB	12873	2014	1	2	14	24	15	1	514	Ki3xOh7B	DRIL38.155	73	5.5	5	4	1	31	23	4.1
SLB	12874	2014	1	2	14	24	16	1	515	Ki3xOh7B	DRIL38.118	75	7	6.5	5	3	38	20	5.5
SLB	12875	2014	1	2	14	24	17	1	516	Ki3xOh7B	DRIL38.228	73	7	6.5	4.5	2	34	27	5.2
SLB	12877	2014	1	2	14	24	19	1	518	Ki3xOh7B	DRIL38.140	NA	NA	NA	NA	NA	NA	NA	NA
SLB	12878	2014	1	2	14	24	20	1	519	Ki3xOh7B	DRIL38.001	73	7	6.5	5	2	30	14	5.3
SLB	12879	2014	1	2	14	24	21	1	520	Ki3xOh7B	DRIL38.207	NA	NA	NA	NA	NA	NA	NA	NA
SLB	12880	2014	1	2	14	24	22	1	521	Ki3xOh7B	DRIL38.022	75	7.5	7	5	3	31	16	5.8
SLB	12881	2014	1	2	14	24	23	1	522	Ki3xOh7B	DRIL38.095	NA	NA	NA	NA	NA	NA	NA	NA
SLB	12882	2014	1	2	14	24	24	1	523	Ki3xOh7B	DRIL38.201	NA	NA	NA	NA	NA	NA	NA	NA
SLB	12884	2014	1	2	14	25	23	1	525	Ki3xOh7B	DRIL38.076	NA	NA	NA	NA	NA	NA	NA	NA
SLB	12885	2014	1	2	14	25	22	1	526	Ki3xOh7B	DRIL38.225	75	7.5	7	5	2	30	9	5.6
SLB	12886	2014	1	2	14	25	21	1	527	Ki3xOh7B	DRIL38.073	75	6	5	4	1	26	4	4.2
SLB	12887	2014	1	2	14	25	20	1	528	Ki3xOh7B	DRIL38.069	74	7	6	4	1	32	14	4.7
SLB	12889	2014	1	2	14	25	18	1	530	Ki3xOh7B	DRIL38.081	69	7.5	6.5	4	2	28	13	5.1
SLB	12890	2014	1	2	14	25	17	1	531	Ki3xOh7B	DRIL38.132	71	7	6	3	1	32	18	4.3
SLB	12891	2014	1	2	14	25	16	1	532	Ki3xOh7B	DRIL38.096	72	6.5	6.5	3	1	31	19	4.4
SLB	6542	2015	1	1	1	42	5	1	1	Ki3xOh7B	DRIL38.186	67	7.5	6.5	5	NA	30	22	6.4
SLB	6543	2015	1	1	1	42	6	1	2	Ki3xOh7B	DRIL38.014	71	7.5	7	5.5	NA	32	27	6.8
SLB	6545	2015	1	1	1	42	8	1	4	Ki3xOh7B	DRIL38.069	71	7	6	4	NA	32	22	5.8
SLB	6546	2015	1	1	1	42	9	1	5	Ki3xOh7B	DRIL38.065	71	8	7	5.5	NA	40	27	6.9
SLB	6547	2015	1	1	1	42	10	1	6	Ki3xOh7B	DRIL38.181	71	7.5	6.5	4	NA	30	12	6.1
SLB	6548	2015	1	1	1	42	11	1	7	Ki3xOh7B	DRIL38.167	71	7	6	3	NA	30	32	5.5
SLB	6551	2015	1	1	1	42	14	1	10	Ki3xOh7B	DRIL38.134	72	7.5	6.5	5	NA	34	20	6.4
SLB	6552	2015	1	1	1	42	15	1	11	Ki3xOh7B	DRIL38.185	71	7.5	7	6	NA	40	30	6.9
SLB	6553	2015	1	1	1	42	16	1	12	Ki3xOh7B	DRIL38.154	72	7.5	6.5	5	NA	34	20	6.4
SLB	6554	2015	1	1	1	42	17	1	13	Ki3xOh7B	DRIL38.127	72	8	7	5.5	NA	38	30	6.9
SLB	6555	2015	1	1	1	42	18	1	14	Ki3xOh7B	DRIL38.190	73	8	7.5	7	NA	30	27	7.5
SLB	6556	2015	1	1	1	42	19	1	15	Ki3xOh7B	DRIL38.044	72	7.5	7	6	NA	5	32	6.9
SLB	6557	2015	1	1	1	42	20	1	16	Ki3xOh7B	DRIL38.019	72	7.5	6.5	5	NA	38	27	6.4
SLB	6558	2015	1	1	1	42	21	1	17	Ki3xOh7B	DRIL38.172	72	8	7	6	NA	34	34	7
SLB	6559	2015	1	1	1	42	22	1	18	Ki3xOh7B	DRIL38.226	70	8	7	6.5	NA	44	32	7.1
SLB	6560	2015	1	1	1	42	23	1	19	Ki3xOh7B	DRIL38.066	70	7.5	6.5	5.5	NA	40	36	6.5
SLB	6564	2015	1	1	2	42	27	1	23	Ki3xOh7B	DRIL38.225	72	7.5	7	5.5	NA	38	27	6.8
SLB	6566	2015	1	1	2	43	28	1	25	Ki3xOh7B	DRIL38.104	72	7.5	6.5	5	NA	32	34	6.4
SLB	6567	2015	1	1	2	43	27	1	26	Ki3xOh7B	DRIL38.053	71	7.5	7	6	NA	40	36	6.9
SLB	6569	2015	1	1	2	43	25	1	28	Ki3xOh7B	DRIL38.111	71	7.5	7	6	NA	44	38	6.9
SLB	6571	2015	1	1	2	43	23	1	30	Ki3xOh7B	DRIL38.128	69	7	6	2	NA	30	27	5.3
SLB	6572	2015	1	1	2	43	22	1	31	Ki3xOh7B	DRIL38.201	71	8.5	7	6.5	NA	42	41	7.3
SLB	6573	2015	1	1	2	43	21	1	32	Ki3xOh7B	DRIL38.021	71	7.5	7	5	NA	40	32	6.6
SLB	6575	2015	1	1	2	43	19	1	34	Ki3xOh7B	DRIL38.199	71	7.5	6.5	5	NA	30	18	6.4
SLB	6576	2015	1	1	2	43	18	1	35	Ki3xOh7B	DRIL38.041	69	7.5	6.5	5	NA	28	18	6.4
SLB	6577	2015	1	1	2	43	17	1	36	Ki3xOh7B	DRIL38.197	71	8	7	6	NA	40	20	7
SLB	6579	2015	1	1	2	43	15	1	38	Ki3xOh7B	DRIL38.218	74	7.5	6.5	5	NA	26	22	6.4
SLB	6580	2015	1	1	3	43	14	1	39	Ki3xOh7B	DRIL38.033	69	7.5	6.5	5	NA	30	22	6.4
SLB	6581	2015	1	1	3	43	13	1	40	Ki3xOh7B	DRIL38.195	72	8	7	6	NA	38	20	7
SLB	6582	2015	1	1	3	43	12	1	41	Ki3xOh7B	DRIL38.018	72	7.5	6.5	5	NA	40	32	6.4
SLB	6583	2015	1	1	3	43	11	1	42	Ki3xOh7B	DRIL38.147	72	7.5	6.5	5	NA	38	30	6.4
SLB	6584	2015	1	1	3	43	10	1	43	Ki3xOh7B	DRIL38.168	NA	7	6.5	5	NA	32	27	6.3
SLB	6586	2015	1	1	3	43	8	1	45	Ki3xOh7B	DRIL38.231	68	7.5	6.5	6	NA	3	38	6.6
SLB	6587	2015	1	1	3	43	7	1	46	Ki3xOh7B	DRIL38.037	NA	NA	NA	NA	NA	NA	NA	NA
SLB	6588	2015	1	1	3	43	6	1	47	Ki3xOh7B	DRIL38.189	73	7.5	7	6	NA	40	32	6.9
SLB	6591	2015	1	1	3	43	3	1	50	Ki3xOh7B	DRIL38.036	71	7	6	3	NA	36	27	5.5
SLB	6592	2015	1	1	3	43	2	1	51	Ki3xOh7B	DRIL38.191	71	7.5	6.5	5	NA	30	25	6.4
SLB	6593	2015	1	1	3	43	1	1	52	Ki3xOh7B	DRIL38.007	73	7.5	6.5	3	NA	40	22	5.9
SLB	6594	2015	1	1	3	44	1	1	53	Ki3xOh7B	DRIL38.110	73	7	6	3	NA	34	16	5.5
SLB	6595	2015	1	1	3	44	2	1	54	Ki3xOh7B	DRIL38.187	71	8	7	6	NA	36	32	7
SLB	6596	2015	1	1	3	44	3	1	55	Ki3xOh7B	DRIL38.071	73	7.5	6.5	3	NA	38	20	5.9
SLB	6597	2015	1	1	3	44	4	1	56	Ki3xOh7B	DRIL38.117	70	7.5	6.5	3	NA	34	22	5.9
SLB	6599	2015	1	1	4	2	1	2	58	Ki3xOh7B	DRIL38.016	NA	NA	NA	NA	NA	NA	NA	NA
SLB	6600	2015	1	1	4	2	2	2	59	Ki3xOh7B	DRIL38.160	71	8	7.5	7	NA	44	32	7.5
SLB	6601	2015	1	1	4	2	3	2	60	Ki3xOh7B	DRIL38.192	68	8	7.5	6.5	NA	3	36	7.4
SLB	6602	2015	1	1	4	2	4	2	61	Ki3xOh7B	DRIL38.211	68	7.5	6.5	5	NA	34	27	6.4
SLB	6603	2015	1	1	4	2	5	2	62	Ki3xOh7B	DRIL38.052	72	7.5	6.5	4	NA	40	22	6.1
SLB	6604	2015	1	1	4	2	6	2	63	Ki3xOh7B	DRIL38.068	71	8	7	4	NA	36	20	6.5
SLB	6605	2015	1	1	4	2	7	2	64	Ki3xOh7B	DRIL38.184	71	8	7	5.5	NA	36	12	6.9
SLB	6607	2015	1	1	4	2	9	2	66	Ki3xOh7B	DRIL38.140	71	7.5	6.5	5	NA	34	25	6.4
SLB	6608	2015	1	1	4	2	10	2	67	Ki3xOh7B	DRIL38.138	68	7.5	6.5	5	NA	38	30	6.4
SLB	6609	2015	1	1	4	2	11	2	68	Ki3xOh7B	DRIL38.180	73	7.5	7	5.5	NA	30	25	6.8
SLB	6610	2015	1	1	4	2	12	2	69	Ki3xOh7B	DRIL38.155	72	7.5	6.5	5.5	NA	44	32	6.5
SLB	6611	2015	1	1	4	2	13	2	70	Ki3xOh7B	DRIL38.205	72	7.5	6.5	5	NA	32	22	6.4
SLB	6612	2015	1	1	4	2	14	2	71	Ki3xOh7B	DRIL38.125	65	7	6.5	5	NA	36	22	6.3
SLB	6613	2015	1	1	4	2	15	2	72	Ki3xOh7B	DRIL38.085	72	7.5	7	5	NA	44	36	6.6
SLB	6614	2015	1	1	4	2	16	2	73	Ki3xOh7B	DRIL38.123	72	8	7	6	NA	38	38	7
SLB	6615	2015	1	1	4	2	17	2	74	Ki3xOh7B	DRIL38.179	NA	7.5	6.5	5	NA	30	6	6.4
SLB	6617	2015	1	1	4	2	19	2	76	Ki3xOh7B	DRIL38.047	NA	7.5	6.5	5	NA	40	22	6.4
SLB	6618	2015	1	1	5	2	20	2	77	Ki3xOh7B	DRIL38.025	69	8	7.5	6	NA	38	25	7.3
SLB	6620	2015	1	1	5	2	22	2	79	Ki3xOh7B	DRIL38.010	69	7.5	7	5.5	NA	38	30	6.8
SLB	6621	2015	1	1	5	2	23	2	80	Ki3xOh7B	DRIL38.209	68	8	7	6.5	NA	5	39	7.1
SLB	6622	2015	1	1	5	2	24	2	81	Ki3xOh7B	DRIL38.229	68	7.5	6.5	5.5	NA	36	25	6.5
SLB	6623	2015	1	1	5	2	25	2	82	Ki3xOh7B	DRIL38.175	71	7.5	7	7	NA	36	25	7.1
SLB	6624	2015	1	1	5	2	26	2	83	Ki3xOh7B	DRIL38.060	72	7.5	6.5	5.5	NA	40	25	6.5
SLB	6625	2015	1	1	5	2	27	2	84	Ki3xOh7B	DRIL38.091	71	7.5	6.5	5	NA	42	34	6.4
SLB	6626	2015	1	1	5	2	28	2	85	Ki3xOh7B	DRIL38.113	69	7.5	7	6	NA	32	22	6.9
SLB	6627	2015	1	1	5	3	28	2	86	Ki3xOh7B	DRIL38.001	72	8	7	5.5	NA	40	27	6.9
SLB	6628	2015	1	1	5	3	27	2	87	Ki3xOh7B	DRIL38.217	69	8	7	6.5	NA	40	36	7.1
SLB	6629	2015	1	1	5	3	26	2	88	Ki3xOh7B	DRIL38.139	68	7.5	7	6	NA	36	25	6.9
SLB	6631	2015	1	1	5	3	24	2	90	Ki3xOh7B	DRIL38.077	67	7.5	6.5	6	NA	32	27	6.6
SLB	6632	2015	1	1	5	3	23	2	91	Ki3xOh7B	DRIL38.046	67	7	6	5	NA	34	32	6
SLB	6633	2015	1	1	5	3	22	2	92	Ki3xOh7B	DRIL38.142	71	7.5	6.5	4	NA	38	27	6.1
SLB	6634	2015	1	1	5	3	21	2	93	Ki3xOh7B	DRIL38.148	75	8	7	5.5	NA	44	22	6.9
SLB	6635	2015	1	1	5	3	20	2	94	Ki3xOh7B	DRIL38.230	72	8.5	7.5	7	NA	32	20	7.6
SLB	6638	2015	1	1	6	3	17	2	97	Ki3xOh7B	DRIL38.143	71	7.5	6.5	4.5	NA	40	30	6.3
SLB	6639	2015	1	1	6	3	16	2	98	Ki3xOh7B	DRIL38.063	73	7.5	6.5	5	NA	42	27	6.4
SLB	6641	2015	1	1	6	3	14	2	100	Ki3xOh7B	DRIL38.150	68	7.5	6.5	5.5	NA	42	34	6.5
SLB	6642	2015	1	1	6	3	13	2	101	Ki3xOh7B	DRIL38.082	72	8.5	7.5	7	NA	36	16	7.6
SLB	6644	2015	1	1	6	3	11	2	103	Ki3xOh7B	DRIL38.188	67	8	7	6	NA	36	36	7
SLB	6645	2015	1	1	6	3	10	2	104	Ki3xOh7B	DRIL38.119	68	8	6.5	4	NA	36	22	6.3
SLB	6646	2015	1	1	6	3	9	2	105	Ki3xOh7B	DRIL38.122	NA	NA	NA	NA	NA	NA	NA	NA
SLB	6647	2015	1	1	6	3	8	2	106	Ki3xOh7B	DRIL38.096	71	7.5	7	5.5	NA	42	22	6.8
SLB	6648	2015	1	1	6	3	7	2	107	Ki3xOh7B	DRIL38.214	71	7.5	6.5	4.5	NA	38	27	6.3
SLB	6649	2015	1	1	6	3	6	2	108	Ki3xOh7B	DRIL38.221	75	7.5	6	5	NA	30	25	6.1
SLB	6650	2015	1	1	6	3	5	2	109	Ki3xOh7B	DRIL38.126	73	7.5	7	5	NA	40	30	6.6
SLB	6651	2015	1	1	6	3	4	2	110	Ki3xOh7B	DRIL38.118	NA	NA	NA	NA	NA	NA	NA	NA
SLB	6652	2015	1	1	6	3	3	2	111	Ki3xOh7B	DRIL38.105	71	7.5	7	5	NA	34	25	6.6
SLB	6654	2015	1	1	6	3	1	2	113	Ki3xOh7B	DRIL38.059	72	8	7.5	7	NA	42	22	7.5
SLB	6656	2015	1	1	7	4	2	2	115	Ki3xOh7B	DRIL38.008	74	7	6	5	NA	34	25	6
SLB	6657	2015	1	1	7	4	3	2	116	Ki3xOh7B	DRIL38.178	73	8	7.5	6	NA	38	25	7.3
SLB	6658	2015	1	1	7	4	4	2	117	Ki3xOh7B	DRIL38.049	71	7	6	5	NA	38	30	6
SLB	6659	2015	1	1	7	4	5	2	118	Ki3xOh7B	DRIL38.072	67	7.5	6	3	NA	32	25	5.6
SLB	6660	2015	1	1	7	4	6	2	119	Ki3xOh7B	DRIL38.038	67	7.5	6	3	NA	42	32	5.6
SLB	6661	2015	1	1	7	4	7	2	120	Ki3xOh7B	DRIL38.129	72	7.5	6.5	5	NA	34	16	6.4
SLB	6664	2015	1	1	7	4	10	2	123	Ki3xOh7B	DRIL38.048	71	7.5	6.5	3	NA	42	25	5.9
SLB	6665	2015	1	1	7	4	11	2	124	Ki3xOh7B	DRIL38.088	70	7	6	4	NA	36	30	5.8
SLB	6669	2015	1	1	7	4	15	2	128	Ki3xOh7B	DRIL38.076	71	7	6.5	4	NA	38	30	6
SLB	6670	2015	1	1	7	4	16	2	129	Ki3xOh7B	DRIL38.158	67	8	7	5.5	NA	38	30	6.9
SLB	6671	2015	1	1	7	4	17	2	130	Ki3xOh7B	DRIL38.228	71	7.5	6.5	5	NA	40	25	6.4
SLB	6672	2015	1	1	7	4	18	2	131	Ki3xOh7B	DRIL38.011	67	7.5	6.5	4.5	NA	42	34	6.3
SLB	6673	2015	1	1	7	4	19	2	132	Ki3xOh7B	DRIL38.232	66	7	6.5	5	NA	38	32	6.3
SLB	6674	2015	1	1	7	4	20	2	133	Ki3xOh7B	DRIL38.146	72	6.5	5	3	NA	38	30	4.9
SLB	6675	2015	1	1	8	4	21	2	134	Ki3xOh7B	DRIL38.027	71	7.5	6	4	NA	3	39	5.9
SLB	6678	2015	1	1	8	4	24	2	137	Ki3xOh7B	DRIL38.136	72	7.5	6.5	5	NA	36	38	6.4
SLB	6679	2015	1	1	8	4	25	2	138	Ki3xOh7B	DRIL38.219	69	7.5	6.5	5.5	NA	36	27	6.5
SLB	6680	2015	1	1	8	4	26	2	139	Ki3xOh7B	DRIL38.131	67	7.5	6.5	5	NA	36	16	6.4
SLB	6681	2015	1	1	8	4	27	2	140	Ki3xOh7B	DRIL38.022	67	7.5	6.5	4	NA	32	22	6.1
SLB	6683	2015	1	1	8	5	28	2	142	Ki3xOh7B	DRIL38.050	71	7.5	6.5	6	NA	3	36	6.6
SLB	6684	2015	1	1	8	5	27	2	143	Ki3xOh7B	DRIL38.153	70	7	6	3	NA	30	30	5.5
SLB	6685	2015	1	1	8	5	26	2	144	Ki3xOh7B	DRIL38.084	71	7.5	6.5	6	NA	38	32	6.6
SLB	6687	2015	1	1	8	5	24	2	146	Ki3xOh7B	DRIL38.032	70	8	7	5.5	NA	42	34	6.9
SLB	6688	2015	1	1	8	5	23	2	147	Ki3xOh7B	DRIL38.115	71	7	6	5	NA	38	20	6
SLB	6689	2015	1	1	8	5	22	2	148	Ki3xOh7B	DRIL38.083	71	8	7	5	NA	36	30	6.8
SLB	6690	2015	1	1	8	5	21	2	149	Ki3xOh7B	DRIL38.055	73	7.5	6.5	5	NA	3	38	6.4
SLB	6692	2015	1	1	8	5	19	2	151	Ki3xOh7B	DRIL38.159	73	7.5	6.5	4	NA	42	36	6.1
SLB	6693	2015	1	1	8	5	18	2	152	Ki3xOh7B	DRIL38.061	71	7.5	6	4	NA	40	32	5.9
SLB	6695	2015	1	1	9	5	16	2	154	Ki3xOh7B	DRIL38.023	67	8	7	5	NA	38	27	6.8
SLB	6696	2015	1	1	9	5	15	2	155	Ki3xOh7B	DRIL38.222	71	8	7	5.5	NA	42	32	6.9
SLB	6697	2015	1	1	9	5	14	2	156	Ki3xOh7B	DRIL38.224	68	7.5	7	5.5	NA	40	27	6.8
SLB	6698	2015	1	1	9	5	13	2	157	Ki3xOh7B	DRIL38.156	71	7	6.5	3	NA	32	20	5.8
SLB	6699	2015	1	1	9	5	12	2	158	Ki3xOh7B	DRIL38.109	68	7.5	6.5	5	NA	42	32	6.4
SLB	6700	2015	1	1	9	5	11	2	159	Ki3xOh7B	DRIL38.040	68	7	6	3	NA	38	27	5.5
SLB	6701	2015	1	1	9	5	10	2	160	Ki3xOh7B	DRIL38.170	71	8.5	8	7	NA	34	18	7.9
SLB	6702	2015	1	1	9	5	9	2	161	Ki3xOh7B	DRIL38.223	68	8.5	8	6	NA	32	22	7.6
SLB	6705	2015	1	1	9	5	6	2	164	Ki3xOh7B	DRIL38.097	68	8	7	6.5	NA	38	27	7.1
SLB	6706	2015	1	1	9	5	5	2	165	Ki3xOh7B	DRIL38.112	71	7.5	6.5	5	NA	40	30	6.4
SLB	6707	2015	1	1	9	5	4	2	166	Ki3xOh7B	DRIL38.116	71	7.5	6.5	5	NA	42	36	6.4
SLB	6708	2015	1	1	9	5	3	2	167	Ki3xOh7B	DRIL38.137	71	7	6	4	NA	26	20	5.8
SLB	6709	2015	1	1	9	5	2	2	168	Ki3xOh7B	DRIL38.120	68	7	6	4.5	NA	36	22	5.9
SLB	6710	2015	1	1	9	5	1	2	169	Ki3xOh7B	DRIL38.208	67	8	7	5.5	NA	36	30	6.9
SLB	6711	2015	1	1	9	6	1	2	170	Ki3xOh7B	DRIL38.031	71	7.5	6.5	5.5	NA	44	34	6.5
SLB	6712	2015	1	1	9	6	2	2	171	Ki3xOh7B	DRIL38.089	71	7	6	3	NA	34	22	5.5
SLB	6713	2015	1	1	10	6	3	2	172	Ki3xOh7B	DRIL38.009	71	7.5	6.5	3	NA	34	30	5.9
SLB	6714	2015	1	1	10	6	4	2	173	Ki3xOh7B	DRIL38.227	72	8	6.5	5.5	NA	36	30	6.6
SLB	6715	2015	1	1	10	6	5	2	174	Ki3xOh7B	DRIL38.103	73	7.5	6.5	4	NA	40	27	6.1
SLB	6716	2015	1	1	10	6	6	2	175	Ki3xOh7B	DRIL38.177	71	8	7	5	NA	28	16	6.8
SLB	6718	2015	1	1	10	6	8	2	177	Ki3xOh7B	DRIL38.035	72	8	7.5	5.5	NA	40	32	7.1
SLB	6720	2015	1	1	10	6	10	2	179	Ki3xOh7B	DRIL38.133	69	8	7.5	6	NA	38	25	7.3
SLB	6721	2015	1	1	10	6	11	2	180	Ki3xOh7B	DRIL38.151	71	7.5	6.5	5	NA	42	20	6.4
SLB	6722	2015	1	1	10	6	12	2	181	Ki3xOh7B	DRIL38.090	71	7.5	7	5	NA	44	25	6.6
SLB	6723	2015	1	1	10	6	13	2	182	Ki3xOh7B	DRIL38.056	70	7.5	6.5	4.5	NA	42	32	6.3
SLB	6725	2015	1	1	10	6	15	2	184	Ki3xOh7B	DRIL38.203	68	7.5	7.5	6	NA	44	32	7.1
SLB	6727	2015	1	1	10	6	17	2	186	Ki3xOh7B	DRIL38.198	73	7	6	4	NA	32	6	5.8
SLB	6728	2015	1	1	10	6	18	2	187	Ki3xOh7B	DRIL38.196	71	7	6	4	NA	38	25	5.8
SLB	6729	2015	1	1	10	6	19	2	188	Ki3xOh7B	DRIL38.034	69	7.5	6	4	NA	40	34	5.9
SLB	6730	2015	1	1	10	6	20	2	189	Ki3xOh7B	DRIL38.163	71	7	6	4	NA	38	30	5.8
SLB	6731	2015	1	1	10	6	21	2	190	Ki3xOh7B	DRIL38.132	68	7.5	6.5	4	NA	44	34	6.1
SLB	6732	2015	1	1	11	6	22	2	191	Ki3xOh7B	DRIL38.094	67	7.5	5.5	3	NA	36	30	5.4
SLB	6733	2015	1	1	11	6	23	2	192	Ki3xOh7B	DRIL38.073	71	7.5	7	5.5	NA	30	25	6.8
SLB	6734	2015	1	1	11	6	24	2	193	Ki3xOh7B	DRIL38.057	73	7.5	6.5	3	NA	40	20	5.9
SLB	6735	2015	1	1	11	6	25	2	194	Ki3xOh7B	DRIL38.029	68	7.5	6	5.5	NA	42	30	6.3
SLB	6737	2015	1	1	11	6	27	2	196	Ki3xOh7B	DRIL38.012	NA	NA	NA	NA	NA	NA	NA	NA
SLB	6738	2015	1	1	11	6	28	2	197	Ki3xOh7B	DRIL38.045	NA	NA	NA	NA	NA	NA	NA	NA
SLB	6739	2015	1	1	11	7	28	2	198	Ki3xOh7B	DRIL38.206	68	7.5	7	5.5	NA	40	32	6.8
SLB	6740	2015	1	1	11	7	27	2	199	Ki3xOh7B	DRIL38.024	69	7.5	6.5	5	NA	28	20	6.4
SLB	6741	2015	1	1	11	7	26	2	200	Ki3xOh7B	DRIL38.051	67	7.5	6.5	5	NA	38	32	6.4
SLB	6742	2015	1	1	11	7	25	2	201	Ki3xOh7B	DRIL38.130	68	7.5	6	4	NA	32	22	5.9
SLB	6743	2015	1	1	11	7	24	2	202	Ki3xOh7B	DRIL38.106	67	7.5	6	3	NA	36	27	5.6
SLB	6744	2015	1	1	11	7	23	2	203	Ki3xOh7B	DRIL38.079	67	7.5	6.5	5	NA	34	27	6.4
SLB	6745	2015	1	1	11	7	22	2	204	Ki3xOh7B	DRIL38.193	71	8	7.5	5.5	NA	44	38	7.1
SLB	6746	2015	1	1	11	7	21	2	205	Ki3xOh7B	DRIL38.157	72	7.5	6	5	NA	40	22	6.1
SLB	6748	2015	1	1	11	7	19	2	207	Ki3xOh7B	DRIL38.216	68	7.5	7	6	NA	32	18	6.9
SLB	6749	2015	1	1	11	7	18	2	208	Ki3xOh7B	DRIL38.095	71	7.5	6.5	5	NA	40	30	6.4
SLB	6750	2015	1	1	11	7	17	2	209	Ki3xOh7B	DRIL38.015	72	8	7	5.5	NA	36	25	6.9
SLB	6751	2015	1	1	12	7	16	2	210	Ki3xOh7B	DRIL38.210	68	7.5	7	6	NA	32	30	6.9
SLB	6752	2015	1	1	12	7	15	2	211	Ki3xOh7B	DRIL38.020	69	8	7.5	6	NA	40	36	7.3
SLB	6753	2015	1	1	12	7	14	2	212	Ki3xOh7B	DRIL38.171	68	8	7.5	6.5	NA	38	30	7.4
SLB	6755	2015	1	1	12	7	12	2	214	Ki3xOh7B	DRIL38.169	67	7.5	6.5	5	NA	34	18	6.4
SLB	6756	2015	1	1	12	7	11	2	215	Ki3xOh7B	DRIL38.194	73	8	6.5	5	NA	34	30	6.5
SLB	6757	2015	1	1	12	7	10	2	216	Ki3xOh7B	DRIL38.202	72	8.5	7	6	NA	34	27	7.1
SLB	6759	2015	1	1	12	7	8	2	218	Ki3xOh7B	DRIL38.074	72	7.5	7	5	NA	3	36	6.6
SLB	6760	2015	1	1	12	7	7	2	219	Ki3xOh7B	DRIL38.166	71	8	7	6	NA	40	39	7
SLB	6761	2015	1	1	12	7	6	2	220	Ki3xOh7B	DRIL38.003	68	8	7	6.5	NA	38	27	7.1
SLB	6762	2015	1	1	12	7	5	2	221	Ki3xOh7B	DRIL38.152	70	7.5	6.5	3	NA	42	27	5.9
SLB	6763	2015	1	1	12	7	4	2	222	Ki3xOh7B	DRIL38.141	73	7.5	7	5.5	NA	3	32	6.8
SLB	6765	2015	1	1	12	7	2	2	224	Ki3xOh7B	DRIL38.114	71	7.5	7	5.5	NA	44	30	6.8
SLB	6766	2015	1	1	12	7	1	2	225	Ki3xOh7B	DRIL38.080	68	8	7.5	6.5	NA	42	38	7.4
SLB	6767	2015	1	1	12	8	1	2	226	Ki3xOh7B	DRIL38.162	68	7.5	7	6	NA	40	32	6.9
SLB	6768	2015	1	1	12	8	2	2	227	Ki3xOh7B	DRIL38.086	73	7.5	7	6	NA	38	12	6.9
SLB	6769	2015	1	1	12	8	3	2	228	Ki3xOh7B	DRIL38.054	69	8	6.5	5	NA	34	30	6.5
SLB	6770	2015	1	1	13	8	4	2	229	Ki3xOh7B	DRIL38.028	70	7.5	7	5.5	NA	40	34	6.8
SLB	6771	2015	1	1	13	8	5	2	230	Ki3xOh7B	DRIL38.004	70	7.5	6	4.5	NA	38	30	6
SLB	6772	2015	1	1	13	8	6	2	231	Ki3xOh7B	DRIL38.026	73	7.5	6.5	4.5	NA	34	27	6.3
SLB	6773	2015	1	1	13	8	7	2	232	Ki3xOh7B	DRIL38.062	72	7.5	6.5	5	NA	38	27	6.4
SLB	6776	2015	1	1	13	8	10	2	235	Ki3xOh7B	DRIL38.183	68	7.5	6.5	5	NA	36	27	6.4
SLB	6777	2015	1	1	13	8	11	2	236	Ki3xOh7B	DRIL38.145	72	7.5	6.5	5	NA	38	27	6.4
SLB	6778	2015	1	1	13	8	12	2	237	Ki3xOh7B	DRIL38.093	71	7.5	7	5	NA	40	30	6.6
SLB	6779	2015	1	1	13	8	13	2	238	Ki3xOh7B	DRIL38.067	73	7.5	6.5	4	NA	40	34	6.1
SLB	6780	2015	1	1	13	8	14	2	239	Ki3xOh7B	DRIL38.101	70	7.5	6.5	5.5	NA	40	30	6.5
SLB	6784	2015	1	1	13	8	18	2	243	Ki3xOh7B	DRIL38.081	71	7.5	7	6	NA	40	27	6.9
SLB	6785	2015	1	1	13	8	19	2	244	Ki3xOh7B	DRIL38.017	72	8	7	5.5	NA	40	32	6.9
SLB	6786	2015	1	1	13	8	20	2	245	Ki3xOh7B	DRIL38.149	71	7.5	7	5.5	NA	42	30	6.8
SLB	6787	2015	1	1	13	8	21	2	246	Ki3xOh7B	DRIL38.043	71	8	7	5	NA	3	32	6.8
SLB	6788	2015	1	1	13	8	22	2	247	Ki3xOh7B	DRIL38.176	73	8	7	5	NA	30	22	6.8
SLB	6789	2015	1	1	14	8	23	2	248	Ki3xOh7B	DRIL38.075	68	7.5	6.5	5	NA	40	34	6.4
SLB	6790	2015	1	1	14	8	24	2	249	Ki3xOh7B	DRIL38.006	70	8.5	7.5	6.5	NA	34	32	7.5
SLB	6791	2015	1	1	14	8	25	2	250	Ki3xOh7B	DRIL38.030	67	7.5	6.5	5	NA	38	34	6.4
SLB	6795	2015	1	1	14	9	28	2	254	Ki3xOh7B	DRIL38.108	71	8	7	5.5	NA	3	38	6.9
SLB	6796	2015	1	1	14	9	27	2	255	Ki3xOh7B	DRIL38.064	73	7.5	7	5.5	NA	36	22	6.8
SLB	6797	2015	1	1	14	9	26	2	256	Ki3xOh7B	DRIL38.220	72	8	7	5.5	NA	36	18	6.9
SLB	6799	2015	1	1	14	9	24	2	258	Ki3xOh7B	DRIL38.144	70	7.5	6.5	5	NA	36	34	6.4
SLB	6800	2015	1	1	14	9	23	2	259	Ki3xOh7B	DRIL38.107	68	7	6	2	NA	38	32	5.3
SLB	6801	2015	1	1	14	9	22	2	260	Ki3xOh7B	DRIL38.078	75	7.5	6.5	5	NA	36	18	6.4
SLB	6802	2015	1	1	14	9	21	2	261	Ki3xOh7B	DRIL38.058	70	8	7	5.5	NA	40	30	6.9
SLB	6803	2015	1	1	14	9	20	2	262	Ki3xOh7B	DRIL38.207	70	7	6	5	NA	32	32	6
SLB	6807	2015	1	1	14	9	16	2	266	Ki3xOh7B	DRIL38.070	71	7.5	7	6	NA	44	27	6.9
SLB	12542	2015	1	2	1	6	11	1	269	Ki3xOh7B	DRIL38.179	NA	7.5	7	6	NA	40	18	6.8
SLB	12543	2015	1	2	1	6	12	1	270	Ki3xOh7B	DRIL38.096	71	7	6.5	5	NA	36	20	6.2
SLB	12544	2015	1	2	1	6	13	1	271	Ki3xOh7B	DRIL38.055	71	7.5	6	5	NA	42	27	6.1
SLB	12545	2015	1	2	1	6	14	1	272	Ki3xOh7B	DRIL38.141	71	7.5	7	5	NA	36	27	6.6
SLB	12547	2015	1	2	1	6	16	1	274	Ki3xOh7B	DRIL38.108	69	8	7	5	NA	44	39	6.7
SLB	12549	2015	1	2	1	6	18	1	276	Ki3xOh7B	DRIL38.036	68	7	6	4	NA	38	32	5.7
SLB	12550	2015	1	2	1	6	19	1	277	Ki3xOh7B	DRIL38.011	67	7	6	4	NA	42	38	5.7
SLB	12551	2015	1	2	1	6	20	1	278	Ki3xOh7B	DRIL38.116	67	7	7	5	NA	7	38	6.4
SLB	12553	2015	1	2	1	6	22	1	280	Ki3xOh7B	DRIL38.175	72	7.5	7	5	NA	30	25	6.6
SLB	12554	2015	1	2	1	6	23	1	281	Ki3xOh7B	DRIL38.073	70	7.5	7	5	NA	42	25	6.6
SLB	12555	2015	1	2	1	6	24	1	282	Ki3xOh7B	DRIL38.144	70	7.5	7	5	NA	44	32	6.6
SLB	12556	2015	1	2	1	6	25	1	283	Ki3xOh7B	DRIL38.090	71	7.5	7	5	NA	40	32	6.6
SLB	12557	2015	1	2	1	6	26	1	284	Ki3xOh7B	DRIL38.109	67	7.5	6.5	5	NA	40	34	6.3
SLB	12558	2015	1	2	1	6	27	1	285	Ki3xOh7B	DRIL38.019	NA	NA	NA	NA	NA	NA	NA	NA
SLB	12559	2015	1	2	2	6	28	1	286	Ki3xOh7B	DRIL38.008	67	7.5	7	5	NA	34	27	6.6
SLB	12561	2015	1	2	2	7	27	1	288	Ki3xOh7B	DRIL38.001	67	7.5	7	5	NA	44	34	6.6
SLB	12562	2015	1	2	2	7	26	1	289	Ki3xOh7B	DRIL38.151	70	8	7	5	NA	42	25	6.7
SLB	12564	2015	1	2	2	7	24	1	291	Ki3xOh7B	DRIL38.202	71	8	7	5	NA	42	25	6.7
SLB	12565	2015	1	2	2	7	23	1	292	Ki3xOh7B	DRIL38.220	69	7.5	6.5	5	NA	34	22	6.3
SLB	12566	2015	1	2	2	7	22	1	293	Ki3xOh7B	DRIL38.206	69	7.5	7	5	NA	36	36	6.6
SLB	12568	2015	1	2	2	7	20	1	295	Ki3xOh7B	DRIL38.017	68	7.5	7	5	NA	40	32	6.6
SLB	12571	2015	1	2	2	7	17	1	298	Ki3xOh7B	DRIL38.159	69	7	6	4	NA	40	30	5.7
SLB	12572	2015	1	2	2	7	16	1	299	Ki3xOh7B	DRIL38.211	69	7.5	7	5	NA	32	34	6.6
SLB	12573	2015	1	2	2	7	15	1	300	Ki3xOh7B	DRIL38.097	68	7.5	7	5	NA	5	36	6.6
SLB	12575	2015	1	2	2	7	13	1	302	Ki3xOh7B	DRIL38.201	71	8	7.5	6	NA	38	32	7.2
SLB	12577	2015	1	2	2	7	11	1	304	Ki3xOh7B	DRIL38.167	67	7.5	6.5	4	NA	40	34	6
SLB	12578	2015	1	2	3	7	10	1	305	Ki3xOh7B	DRIL38.038	67	7.5	6	4	NA	3	34	5.8
SLB	12579	2015	1	2	3	7	9	1	306	Ki3xOh7B	DRIL38.132	69	7	6.5	5	NA	38	30	6.2
SLB	12580	2015	1	2	3	7	8	1	307	Ki3xOh7B	DRIL38.031	71	7.5	7	5	NA	3	30	6.6
SLB	12581	2015	1	2	3	7	7	1	308	Ki3xOh7B	DRIL38.192	66	8	7.5	6	NA	38	32	7.2
SLB	12583	2015	1	2	3	7	5	1	310	Ki3xOh7B	DRIL38.016	67	7.5	6.5	5	NA	36	30	6.3
SLB	12584	2015	1	2	3	7	4	1	311	Ki3xOh7B	DRIL38.065	69	7.5	7	5	NA	42	34	6.6
SLB	12585	2015	1	2	3	7	3	1	312	Ki3xOh7B	DRIL38.142	73	7.5	6.5	4	NA	40	32	6
SLB	12586	2015	1	2	3	7	2	1	313	Ki3xOh7B	DRIL38.118	NA	NA	NA	NA	NA	NA	NA	NA
SLB	12587	2015	1	2	3	7	1	1	314	Ki3xOh7B	DRIL38.194	72	7.5	7	5	NA	36	22	6.6
SLB	12588	2015	1	2	3	8	1	1	315	Ki3xOh7B	DRIL38.227	71	7.5	7	5.5	NA	36	27	6.7
SLB	12589	2015	1	2	3	8	2	1	316	Ki3xOh7B	DRIL38.041	67	7.5	6.5	4	NA	32	20	6
SLB	12590	2015	1	2	3	8	3	1	317	Ki3xOh7B	DRIL38.143	71	7.5	7	5	NA	34	22	6.6
SLB	12591	2015	1	2	3	8	4	1	318	Ki3xOh7B	DRIL38.075	71	8	7.5	5.5	NA	32	27	7.1
SLB	12593	2015	1	2	3	8	6	1	320	Ki3xOh7B	DRIL38.187	71	7.5	7	5	NA	38	27	6.6
SLB	12595	2015	1	2	3	8	8	1	322	Ki3xOh7B	DRIL38.045	NA	NA	NA	NA	NA	NA	NA	NA
SLB	12597	2015	1	2	4	8	10	1	324	Ki3xOh7B	DRIL38.155	71	7.5	7	5	NA	42	34	6.6
SLB	12598	2015	1	2	4	8	11	1	325	Ki3xOh7B	DRIL38.057	73	7.5	6.5	4.5	NA	38	18	6.2
SLB	12599	2015	1	2	4	8	12	1	326	Ki3xOh7B	DRIL38.232	65	7.5	6	4	NA	32	20	5.8
SLB	12600	2015	1	2	4	8	13	1	327	Ki3xOh7B	DRIL38.126	72	7.5	7	5	NA	36	20	6.6
SLB	12601	2015	1	2	4	8	14	1	328	Ki3xOh7B	DRIL38.060	73	7.5	7	5.5	NA	40	34	6.7
SLB	12603	2015	1	2	4	8	16	1	330	Ki3xOh7B	DRIL38.063	75	7.5	7	5	NA	40	25	6.6
SLB	12604	2015	1	2	4	8	17	1	331	Ki3xOh7B	DRIL38.131	NA	NA	NA	NA	NA	NA	NA	NA
SLB	12607	2015	1	2	4	8	20	1	334	Ki3xOh7B	DRIL38.128	68	7.5	6.5	4	NA	42	30	6
SLB	12608	2015	1	2	4	8	21	1	335	Ki3xOh7B	DRIL38.033	68	7	6	4	NA	30	20	5.7
SLB	12610	2015	1	2	4	8	23	1	337	Ki3xOh7B	DRIL38.226	NA	NA	NA	NA	NA	NA	NA	NA
SLB	12611	2015	1	2	4	8	24	1	338	Ki3xOh7B	DRIL38.210	67	7.5	7	5	NA	44	32	6.6
SLB	12612	2015	1	2	4	8	25	1	339	Ki3xOh7B	DRIL38.183	67	7.5	6.5	4	NA	42	34	6
SLB	12613	2015	1	2	4	8	26	1	340	Ki3xOh7B	DRIL38.081	67	7.5	7	5	NA	38	30	6.6
SLB	12614	2015	1	2	4	8	27	1	341	Ki3xOh7B	DRIL38.024	69	7.5	7	4	NA	34	20	6.3
SLB	12615	2015	1	2	4	8	28	1	342	Ki3xOh7B	DRIL38.137	67	7.5	7	4	NA	36	18	6.3
SLB	12616	2015	1	2	5	9	28	1	343	Ki3xOh7B	DRIL38.069	71	7.5	6.5	4	NA	38	22	6
SLB	12617	2015	1	2	5	9	27	1	344	Ki3xOh7B	DRIL38.021	67	7.5	6.5	5	NA	38	30	6.3
SLB	12619	2015	1	2	5	9	25	1	346	Ki3xOh7B	DRIL38.018	68	7.5	6.5	4	NA	44	36	6
SLB	12620	2015	1	2	5	9	24	1	347	Ki3xOh7B	DRIL38.148	75	8	7	5	NA	42	25	6.7
SLB	12621	2015	1	2	5	9	23	1	348	Ki3xOh7B	DRIL38.166	71	8	7	5	NA	40	32	6.7
SLB	12622	2015	1	2	5	9	22	1	349	Ki3xOh7B	DRIL38.208	68	8	6.5	4	NA	34	30	6.1
SLB	12623	2015	1	2	5	9	21	1	350	Ki3xOh7B	DRIL38.072	67	7.5	6.5	4	NA	38	27	6
SLB	12624	2015	1	2	5	9	20	1	351	Ki3xOh7B	DRIL38.022	NA	NA	NA	NA	NA	NA	NA	NA
SLB	12626	2015	1	2	5	9	18	1	353	Ki3xOh7B	DRIL38.160	73	8	7	5.5	NA	44	25	6.8
SLB	12627	2015	1	2	5	9	17	1	354	Ki3xOh7B	DRIL38.070	71	7.5	7	5.5	NA	38	25	6.7
SLB	12630	2015	1	2	5	9	14	1	357	Ki3xOh7B	DRIL38.067	75	7	6	4	NA	40	18	5.7
SLB	12631	2015	1	2	5	9	13	1	358	Ki3xOh7B	DRIL38.216	67	8.5	7.5	4	NA	38	22	6.8
SLB	12632	2015	1	2	5	9	12	1	359	Ki3xOh7B	DRIL38.059	72	8	7	4.5	NA	40	16	6.5
SLB	12633	2015	1	2	5	9	11	1	360	Ki3xOh7B	DRIL38.196	72	7.5	6.5	4	NA	38	25	6
SLB	12634	2015	1	2	5	9	10	1	361	Ki3xOh7B	DRIL38.049	68	7.5	6.5	4.5	NA	38	30	6.2
SLB	12636	2015	1	2	6	9	8	1	363	Ki3xOh7B	DRIL38.146	72	7	6.5	4.5	NA	36	25	6.1
SLB	12637	2015	1	2	6	9	7	1	364	Ki3xOh7B	DRIL38.172	72	8	7	5.5	NA	34	27	6.8
SLB	12639	2015	1	2	6	9	5	1	366	Ki3xOh7B	DRIL38.176	71	8.5	7.5	6	NA	30	16	7.3
SLB	12640	2015	1	2	6	9	4	1	367	Ki3xOh7B	DRIL38.004	71	7.5	7	5.5	NA	36	34	6.7
SLB	12642	2015	1	2	6	9	2	1	369	Ki3xOh7B	DRIL38.111	NA	NA	NA	NA	NA	NA	NA	NA
SLB	12643	2015	1	2	6	9	1	1	370	Ki3xOh7B	DRIL38.195	71	8	7.5	7	NA	30	18	7.5
SLB	12644	2015	1	2	6	10	1	1	371	Ki3xOh7B	DRIL38.061	72	7.5	6.5	4.5	NA	32	20	6.2
SLB	12645	2015	1	2	6	10	2	1	372	Ki3xOh7B	DRIL38.014	71	8	6.5	4.5	NA	36	27	6.3
SLB	12646	2015	1	2	6	10	3	1	373	Ki3xOh7B	DRIL38.046	70	7.5	6.5	4	NA	30	22	6
SLB	12647	2015	1	2	6	10	4	1	374	Ki3xOh7B	DRIL38.123	70	8	7	6	NA	34	32	6.9
SLB	12648	2015	1	2	6	10	5	1	375	Ki3xOh7B	DRIL38.095	68	7.5	6	4	NA	38	30	5.8
SLB	12649	2015	1	2	6	10	6	1	376	Ki3xOh7B	DRIL38.086	74	8	7	5	NA	38	16	6.7
SLB	12650	2015	1	2	6	10	7	1	377	Ki3xOh7B	DRIL38.129	74	8	7	6	NA	44	22	6.9
SLB	12652	2015	1	2	6	10	9	1	379	Ki3xOh7B	DRIL38.089	NA	NA	NA	NA	NA	NA	NA	NA
SLB	12653	2015	1	2	6	10	10	1	380	Ki3xOh7B	DRIL38.058	68	8	7	5	NA	40	32	6.7
SLB	12654	2015	1	2	7	10	11	1	381	Ki3xOh7B	DRIL38.015	71	7.5	6.5	5	NA	38	27	6.3
SLB	12655	2015	1	2	7	10	12	1	382	Ki3xOh7B	DRIL38.101	70	7.5	6.5	5	NA	3	32	6.3
SLB	12656	2015	1	2	7	10	13	1	383	Ki3xOh7B	DRIL38.180	NA	NA	NA	NA	NA	NA	NA	NA
SLB	12657	2015	1	2	7	10	14	1	384	Ki3xOh7B	DRIL38.078	74	8	6.5	4.5	NA	40	22	6.3
SLB	12658	2015	1	2	7	10	15	1	385	Ki3xOh7B	DRIL38.228	71	8	6.5	5	NA	36	20	6.4
SLB	12659	2015	1	2	7	10	16	1	386	Ki3xOh7B	DRIL38.119	71	8	6.5	5	NA	34	12	6.4
SLB	12660	2015	1	2	7	10	17	1	387	Ki3xOh7B	DRIL38.037	69	8	7	5	NA	30	22	6.7
SLB	12661	2015	1	2	7	10	18	1	388	Ki3xOh7B	DRIL38.051	70	7.5	6.5	4.5	NA	38	30	6.2
SLB	12662	2015	1	2	7	10	19	1	389	Ki3xOh7B	DRIL38.103	71	7.5	6.5	4	NA	44	34	6
SLB	12664	2015	1	2	7	10	21	1	391	Ki3xOh7B	DRIL38.050	67	7.5	6.5	4.5	NA	38	27	6.2
SLB	12665	2015	1	2	7	10	22	1	392	Ki3xOh7B	DRIL38.034	68	7.5	6.5	4.5	NA	38	32	6.2
SLB	12666	2015	1	2	7	10	23	1	393	Ki3xOh7B	DRIL38.230	69	8.5	7.5	7	NA	30	18	7.6
SLB	12667	2015	1	2	7	10	24	1	394	Ki3xOh7B	DRIL38.190	72	8	7.5	5.5	NA	34	25	7.1
SLB	12669	2015	1	2	7	10	26	1	396	Ki3xOh7B	DRIL38.074	68	7.5	7	5	NA	42	36	6.6
SLB	12671	2015	1	2	7	10	28	1	398	Ki3xOh7B	DRIL38.040	67	7.5	6	4	NA	34	27	5.8
SLB	12672	2015	1	2	7	11	28	1	399	Ki3xOh7B	DRIL38.219	69	8.5	7.5	6.5	NA	40	25	7.4
SLB	12673	2015	1	2	8	11	27	1	400	Ki3xOh7B	DRIL38.012	NA	NA	NA	NA	NA	NA	NA	NA
SLB	12674	2015	1	2	8	11	26	1	401	Ki3xOh7B	DRIL38.048	71	7.5	6.5	5	NA	38	25	6.3
SLB	12675	2015	1	2	8	11	25	1	402	Ki3xOh7B	DRIL38.229	68	7.5	6.5	5	NA	38	30	6.3
SLB	12676	2015	1	2	8	11	24	1	403	Ki3xOh7B	DRIL38.093	71	7.5	6.5	4.5	NA	38	30	6.2
SLB	12677	2015	1	2	8	11	23	1	404	Ki3xOh7B	DRIL38.080	67	8	7.5	5.5	NA	40	32	7.1
SLB	12680	2015	1	2	8	11	20	1	407	Ki3xOh7B	DRIL38.133	71	8.5	7.5	7	NA	36	27	7.6
SLB	12682	2015	1	2	8	11	18	1	409	Ki3xOh7B	DRIL38.154	71	7.5	6.5	5	NA	38	22	6.3
SLB	12685	2015	1	2	8	11	15	1	412	Ki3xOh7B	DRIL38.225	73	8	6.5	6	NA	38	20	6.7
SLB	12686	2015	1	2	8	11	14	1	413	Ki3xOh7B	DRIL38.052	72	7.5	7	5	NA	3	22	6.6
SLB	12687	2015	1	2	8	11	13	1	414	Ki3xOh7B	DRIL38.054	70	7.5	6.5	5	NA	36	25	6.3
SLB	12688	2015	1	2	8	11	12	1	415	Ki3xOh7B	DRIL38.071	71	7.5	6.5	4.5	NA	38	22	6.2
SLB	12689	2015	1	2	8	11	11	1	416	Ki3xOh7B	DRIL38.221	NA	NA	NA	NA	NA	NA	NA	NA
SLB	12691	2015	1	2	8	11	9	1	418	Ki3xOh7B	DRIL38.006	72	8	7.5	6	NA	38	25	7.2
SLB	12692	2015	1	2	9	11	8	1	419	Ki3xOh7B	DRIL38.010	71	7.5	7	5	NA	38	27	6.6
SLB	12693	2015	1	2	9	11	7	1	420	Ki3xOh7B	DRIL38.110	70	8	7	5.5	NA	36	27	6.8
SLB	12694	2015	1	2	9	11	6	1	421	Ki3xOh7B	DRIL38.138	71	7.5	6.5	5	NA	42	25	6.3
SLB	12696	2015	1	2	9	11	4	1	423	Ki3xOh7B	DRIL38.125	67	8	7.5	5.5	NA	40	22	7.1
SLB	12697	2015	1	2	9	11	3	1	424	Ki3xOh7B	DRIL38.084	74	8	7	5.5	NA	30	12	6.8
SLB	12698	2015	1	2	9	11	2	1	425	Ki3xOh7B	DRIL38.149	71	8	7	6	NA	40	27	6.9
SLB	12699	2015	1	2	9	11	1	1	426	Ki3xOh7B	DRIL38.156	NA	NA	NA	NA	NA	NA	NA	NA
SLB	12701	2015	1	2	9	12	2	1	428	Ki3xOh7B	DRIL38.122	NA	NA	NA	NA	NA	NA	NA	NA
SLB	12702	2015	1	2	9	12	3	1	429	Ki3xOh7B	DRIL38.003	70	7.5	7	6	NA	36	20	6.8
SLB	12703	2015	1	2	9	12	4	1	430	Ki3xOh7B	DRIL38.127	71	7.5	6.5	5	NA	44	30	6.3
SLB	12704	2015	1	2	9	12	5	1	431	Ki3xOh7B	DRIL38.009	67	7.5	6.5	4	NA	40	30	6
SLB	12705	2015	1	2	9	12	6	1	432	Ki3xOh7B	DRIL38.193	71	7.5	7	4.5	NA	38	30	6.4
SLB	12706	2015	1	2	9	12	7	1	433	Ki3xOh7B	DRIL38.106	67	7	6	3	NA	28	27	5.4
SLB	12710	2015	1	2	9	12	11	1	437	Ki3xOh7B	DRIL38.218	73	7.5	7	4.5	NA	28	25	6.4
SLB	12711	2015	1	2	10	12	12	1	438	Ki3xOh7B	DRIL38.028	68	7.5	6.5	5	NA	40	30	6.3
SLB	12712	2015	1	2	10	12	13	1	439	Ki3xOh7B	DRIL38.147	71	7.5	7	5	NA	36	22	6.6
SLB	12713	2015	1	2	10	12	14	1	440	Ki3xOh7B	DRIL38.152	68	7	6.5	4	NA	40	22	5.9
SLB	12714	2015	1	2	10	12	15	1	441	Ki3xOh7B	DRIL38.134	70	7.5	6.5	4.5	NA	42	27	6.2
SLB	12717	2015	1	2	10	12	18	1	444	Ki3xOh7B	DRIL38.184	71	7.5	6.5	4	NA	32	10	6
SLB	12718	2015	1	2	10	12	19	1	445	Ki3xOh7B	DRIL38.020	68	8.5	7	4.5	NA	40	34	6.6
SLB	12719	2015	1	2	10	12	20	1	446	Ki3xOh7B	DRIL38.025	68	7.5	7	5	NA	36	27	6.6
SLB	12720	2015	1	2	10	12	21	1	447	Ki3xOh7B	DRIL38.115	71	7.5	6.5	4	NA	36	20	6
SLB	12721	2015	1	2	10	12	22	1	448	Ki3xOh7B	DRIL38.207	72	7.5	6	4.5	NA	38	27	5.9
SLB	12723	2015	1	2	10	12	24	1	450	Ki3xOh7B	DRIL38.178	71	8	7.5	6	NA	40	25	7.2
SLB	12724	2015	1	2	10	12	25	1	451	Ki3xOh7B	DRIL38.077	67	8	7	5	NA	38	34	6.7
SLB	12725	2015	1	2	10	12	26	1	452	Ki3xOh7B	DRIL38.023	68	8	7.5	5	NA	36	27	6.9
SLB	12726	2015	1	2	10	12	27	1	453	Ki3xOh7B	DRIL38.189	68	7	6.5	4.5	NA	40	25	6.1
SLB	12727	2015	1	2	10	12	28	1	454	Ki3xOh7B	DRIL38.157	71	7.5	6.5	4	NA	24	20	6
SLB	12728	2015	1	2	10	13	28	1	455	Ki3xOh7B	DRIL38.035	68	8	7	5	NA	36	32	6.7
SLB	12729	2015	1	2	10	13	27	1	456	Ki3xOh7B	DRIL38.150	66	7.5	7	5	NA	36	27	6.6
SLB	12730	2015	1	2	11	13	26	1	457	Ki3xOh7B	DRIL38.168	65	7.5	6.5	4	NA	30	27	6
SLB	12731	2015	1	2	11	13	25	1	458	Ki3xOh7B	DRIL38.223	68	8.5	7.5	5	NA	26	22	7
SLB	12733	2015	1	2	11	13	23	1	460	Ki3xOh7B	DRIL38.027	71	7.5	6.5	4	NA	5	32	6
SLB	12735	2015	1	2	11	13	21	1	462	Ki3xOh7B	DRIL38.186	67	7.5	6.5	5	NA	34	18	6.3
SLB	12737	2015	1	2	11	13	19	1	464	Ki3xOh7B	DRIL38.076	NA	NA	NA	NA	NA	NA	NA	NA
SLB	12738	2015	1	2	11	13	18	1	465	Ki3xOh7B	DRIL38.068	70	7.5	7	5	NA	36	18	6.6
SLB	12739	2015	1	2	11	13	17	1	466	Ki3xOh7B	DRIL38.114	70	8	7	4.5	NA	42	32	6.5
SLB	12740	2015	1	2	11	13	16	1	467	Ki3xOh7B	DRIL38.145	NA	NA	NA	NA	NA	NA	NA	NA
SLB	12741	2015	1	2	11	13	15	1	468	Ki3xOh7B	DRIL38.079	68	7.5	6.5	5	NA	34	27	6.3
SLB	12742	2015	1	2	11	13	14	1	469	Ki3xOh7B	DRIL38.203	70	7.5	7	6	NA	40	27	6.8
SLB	12744	2015	1	2	11	13	12	1	471	Ki3xOh7B	DRIL38.199	67	7.5	7	5	NA	34	27	6.6
SLB	12746	2015	1	2	11	13	10	1	473	Ki3xOh7B	DRIL38.177	71	8	7.5	5	NA	38	20	6.9
SLB	12747	2015	1	2	11	13	9	1	474	Ki3xOh7B	DRIL38.214	70	7.5	6.5	4	NA	26	18	6
SLB	12748	2015	1	2	11	13	8	1	475	Ki3xOh7B	DRIL38.139	73	7.5	6.5	5	NA	36	25	6.3
SLB	12749	2015	1	2	12	13	7	1	476	Ki3xOh7B	DRIL38.197	71	7.5	7	5	NA	38	20	6.6
SLB	12750	2015	1	2	12	13	6	1	477	Ki3xOh7B	DRIL38.064	71	8	7	3	NA	38	27	6.1
SLB	12751	2015	1	2	12	13	5	1	478	Ki3xOh7B	DRIL38.136	71	7.5	7	4	NA	40	34	6.3
SLB	12752	2015	1	2	12	13	4	1	479	Ki3xOh7B	DRIL38.053	71	8	6.5	4	NA	42	34	6.1
SLB	12753	2015	1	2	12	13	3	1	480	Ki3xOh7B	DRIL38.117	70	7.5	6.5	5	NA	28	25	6.3
SLB	12754	2015	1	2	12	13	2	1	481	Ki3xOh7B	DRIL38.158	70	8	7	5	NA	30	20	6.7
SLB	12755	2015	1	2	12	13	1	1	482	Ki3xOh7B	DRIL38.112	NA	NA	NA	NA	NA	NA	NA	NA
SLB	12756	2015	1	2	12	14	1	1	483	Ki3xOh7B	DRIL38.094	71	7.5	6	3	NA	34	18	5.5
SLB	12758	2015	1	2	12	14	3	1	485	Ki3xOh7B	DRIL38.188	67	8	7.5	4.5	NA	32	30	6.8
SLB	12760	2015	1	2	12	14	5	1	487	Ki3xOh7B	DRIL38.085	69	7.5	6.5	5	NA	40	27	6.3
SLB	12761	2015	1	2	12	14	6	1	488	Ki3xOh7B	DRIL38.062	NA	NA	NA	NA	NA	NA	NA	NA
SLB	12762	2015	1	2	12	14	7	1	489	Ki3xOh7B	DRIL38.056	68	7	6	4	NA	40	32	5.7
SLB	12763	2015	1	2	12	14	8	1	490	Ki3xOh7B	DRIL38.066	71	7.5	7	5	NA	34	22	6.6
SLB	12764	2015	1	2	12	14	9	1	491	Ki3xOh7B	DRIL38.222	71	7.5	7	4.5	NA	34	22	6.4
SLB	12765	2015	1	2	12	14	10	1	492	Ki3xOh7B	DRIL38.113	67	7.5	6.5	4	NA	36	22	6
SLB	12766	2015	1	2	12	14	11	1	493	Ki3xOh7B	DRIL38.026	71	7.5	6.5	4	NA	40	25	6
SLB	12767	2015	1	2	12	14	12	1	494	Ki3xOh7B	DRIL38.169	67	7	6.5	3	NA	32	22	5.6
SLB	12768	2015	1	2	13	14	13	1	495	Ki3xOh7B	DRIL38.120	69	7.5	6.5	4	NA	34	30	6
SLB	12769	2015	1	2	13	14	14	1	496	Ki3xOh7B	DRIL38.029	71	7.5	7	5.5	NA	42	27	6.7
SLB	12771	2015	1	2	13	14	16	1	498	Ki3xOh7B	DRIL38.140	NA	NA	NA	NA	NA	NA	NA	NA
SLB	12772	2015	1	2	13	14	17	1	499	Ki3xOh7B	DRIL38.209	67	8	7	5.5	NA	44	32	6.8
SLB	12774	2015	1	2	13	14	19	1	501	Ki3xOh7B	DRIL38.171	67	8	7.5	6.5	NA	3	32	7.3
SLB	12775	2015	1	2	13	14	20	1	502	Ki3xOh7B	DRIL38.191	68	7.5	6.5	4	NA	40	32	6
SLB	12776	2015	1	2	13	14	21	1	503	Ki3xOh7B	DRIL38.224	68	7.5	7.5	5	NA	34	30	6.8
SLB	12777	2015	1	2	13	14	22	1	504	Ki3xOh7B	DRIL38.104	NA	NA	NA	NA	NA	NA	NA	NA
SLB	12779	2015	1	2	13	14	24	1	506	Ki3xOh7B	DRIL38.082	68	8	7.5	5.5	NA	38	22	7.1
SLB	12780	2015	1	2	13	14	25	1	507	Ki3xOh7B	DRIL38.217	67	7.5	7	5	NA	44	30	6.6
SLB	12781	2015	1	2	13	14	26	1	508	Ki3xOh7B	DRIL38.198	72	7.5	6.5	4	NA	40	18	6
SLB	12782	2015	1	2	13	14	27	1	509	Ki3xOh7B	DRIL38.107	67	6.5	5.5	2	NA	36	34	4.8
SLB	12784	2015	1	2	13	15	28	1	511	Ki3xOh7B	DRIL38.032	68	8	7	5	NA	44	36	6.7
SLB	12785	2015	1	2	13	15	27	1	512	Ki3xOh7B	DRIL38.181	67	7	6.5	4	NA	32	18	5.9
SLB	12786	2015	1	2	13	15	26	1	513	Ki3xOh7B	DRIL38.185	67	8	7.5	6.5	NA	40	30	7.3
SLB	12787	2015	1	2	14	15	25	1	514	Ki3xOh7B	DRIL38.130	NA	NA	NA	NA	NA	NA	NA	NA
SLB	12788	2015	1	2	14	15	24	1	515	Ki3xOh7B	DRIL38.163	71	7.5	6.5	4.5	NA	38	30	6.2
SLB	12789	2015	1	2	14	15	23	1	516	Ki3xOh7B	DRIL38.083	67	8	7.5	5.5	NA	40	30	7.1
SLB	12790	2015	1	2	14	15	22	1	517	Ki3xOh7B	DRIL38.088	68	7	6	3	NA	38	34	5.4
SLB	12791	2015	1	2	14	15	21	1	518	Ki3xOh7B	DRIL38.044	69	8	7.5	5	NA	5	32	6.9
SLB	12792	2015	1	2	14	15	20	1	519	Ki3xOh7B	DRIL38.162	68	7.5	7	4.5	NA	30	32	6.4
SLB	12794	2015	1	2	14	15	18	1	521	Ki3xOh7B	DRIL38.231	65	8	7	5	NA	40	39	6.7
SLB	12795	2015	1	2	14	15	17	1	522	Ki3xOh7B	DRIL38.043	70	8	7	5	NA	42	25	6.7
SLB	12796	2015	1	2	14	15	16	1	523	Ki3xOh7B	DRIL38.105	71	7.5	7	5	NA	40	25	6.6
SLB	12797	2015	1	2	14	15	15	1	524	Ki3xOh7B	DRIL38.205	NA	NA	NA	NA	NA	NA	NA	NA
SLB	12799	2015	1	2	14	15	13	1	526	Ki3xOh7B	DRIL38.153	68	7.5	7	4.5	NA	30	22	6.4
SLB	12800	2015	1	2	14	15	12	1	527	Ki3xOh7B	DRIL38.047	71	7	6.5	5	NA	28	14	6.2
SLB	12802	2015	1	2	14	15	10	1	529	Ki3xOh7B	DRIL38.030	71	7.5	6.5	4.5	NA	40	27	6.2
SLB	12803	2015	1	2	14	15	9	1	530	Ki3xOh7B	DRIL38.170	72	8.5	7	6	NA	38	18	7.1
SLB	12804	2015	1	2	14	15	8	1	531	Ki3xOh7B	DRIL38.007	71	7.5	6.5	4.5	NA	42	25	6.2
SLB	12805	2015	1	2	14	15	7	1	532	Ki3xOh7B	DRIL38.091	68	7.5	6	4	NA	40	36	5.8

## Sheet: NLB
trait	plot_nrsry	year	location	rep	block	range	row	field_block	plot_xprmnt	pedigree	entry	dta	sc1	sc2	sc3	sc4	eh	ph	audpc
NLB	16750	2014	1	1	1	12	16	1	1	Ki3xOh7B	DRIL38.051	NA	NA	NA	NA	NA	NA	NA	NA
NLB	16751	2014	1	1	1	12	17	1	2	Ki3xOh7B	DRIL38.232	70	40	45	65	NA	18	56	48.8
NLB	16752	2014	1	1	1	12	18	1	3	Ki3xOh7B	DRIL38.127	NA	NA	NA	NA	NA	NA	NA	NA
NLB	16753	2014	1	1	1	12	19	1	4	Ki3xOh7B	DRIL38.022	70	35	45	50	NA	24	4	43.8
NLB	16755	2014	1	1	1	12	21	1	6	Ki3xOh7B	DRIL38.111	70	55	65	75	NA	36	22	65
NLB	16756	2014	1	1	1	12	22	1	7	Ki3xOh7B	DRIL38.107	70	55	65	75	NA	44	32	65
NLB	16757	2014	1	1	1	12	23	1	8	Ki3xOh7B	DRIL38.222	70	45	65	75	NA	32	20	62.5
NLB	16759	2014	1	1	1	12	25	1	10	Ki3xOh7B	DRIL38.122	70	55	65	85	NA	40	7	67.5
NLB	16761	2014	1	1	1	12	27	1	12	Ki3xOh7B	DRIL38.069	71	50	65	70	NA	38	20	62.5
NLB	16762	2014	1	1	1	12	28	1	13	Ki3xOh7B	DRIL38.199	70	50	65	70	NA	38	23	62.5
NLB	16763	2014	1	1	1	13	28	1	14	Ki3xOh7B	DRIL38.148	75	55	60	70	NA	38	19	61.3
NLB	16764	2014	1	1	1	13	27	1	15	Ki3xOh7B	DRIL38.137	70	55	65	70	NA	35	16	63.8
NLB	16765	2014	1	1	1	13	26	1	16	Ki3xOh7B	DRIL38.103	74	55	65	65	NA	40	22	62.5
NLB	16767	2014	1	1	1	13	24	1	18	Ki3xOh7B	DRIL38.041	70	55	65	70	NA	32	14	63.8
NLB	16768	2014	1	1	1	13	23	1	19	Ki3xOh7B	DRIL38.114	NA	NA	NA	NA	NA	NA	NA	NA
NLB	16769	2014	1	1	2	13	22	1	20	Ki3xOh7B	DRIL38.015	73	40	45	65	NA	30	11	48.8
NLB	16770	2014	1	1	2	13	21	1	21	Ki3xOh7B	DRIL38.006	76	35	45	55	NA	28	18	45
NLB	16772	2014	1	1	2	13	19	1	23	Ki3xOh7B	DRIL38.228	NA	NA	NA	NA	NA	NA	NA	NA
NLB	16773	2014	1	1	2	13	18	1	24	Ki3xOh7B	DRIL38.130	NA	NA	NA	NA	NA	NA	NA	NA
NLB	16774	2014	1	1	2	13	17	1	25	Ki3xOh7B	DRIL38.216	NA	NA	NA	NA	NA	NA	NA	NA
NLB	16775	2014	1	1	2	13	16	1	26	Ki3xOh7B	DRIL38.118	NA	NA	NA	NA	NA	NA	NA	NA
NLB	16776	2014	1	1	2	13	15	1	27	Ki3xOh7B	DRIL38.091	NA	NA	NA	NA	NA	NA	NA	NA
NLB	16779	2014	1	1	2	13	12	1	30	Ki3xOh7B	DRIL38.129	NA	NA	NA	NA	NA	NA	NA	NA
NLB	16781	2014	1	1	2	13	10	1	32	Ki3xOh7B	DRIL38.158	NA	NA	NA	NA	NA	NA	NA	NA
NLB	16782	2014	1	1	2	13	9	1	33	Ki3xOh7B	DRIL38.085	NA	NA	NA	NA	NA	NA	NA	NA
NLB	16784	2014	1	1	2	13	7	1	35	Ki3xOh7B	DRIL38.017	NA	NA	NA	NA	NA	NA	NA	NA
NLB	16785	2014	1	1	2	13	6	1	36	Ki3xOh7B	DRIL38.097	NA	NA	NA	NA	NA	NA	NA	NA
NLB	16786	2014	1	1	2	13	5	1	37	Ki3xOh7B	DRIL38.176	NA	NA	NA	NA	NA	NA	NA	NA
NLB	16788	2014	1	1	3	13	3	1	39	Ki3xOh7B	DRIL38.072	NA	NA	NA	NA	NA	NA	NA	NA
NLB	16789	2014	1	1	3	13	2	1	40	Ki3xOh7B	DRIL38.113	NA	NA	NA	NA	NA	NA	NA	NA
NLB	16790	2014	1	1	3	13	1	1	41	Ki3xOh7B	DRIL38.154	NA	NA	NA	NA	NA	NA	NA	NA
NLB	16791	2014	1	1	3	14	1	1	42	Ki3xOh7B	DRIL38.166	NA	NA	NA	NA	NA	NA	NA	NA
NLB	16792	2014	1	1	3	14	2	1	43	Ki3xOh7B	DRIL38.180	NA	NA	NA	NA	NA	NA	NA	NA
NLB	16795	2014	1	1	3	14	5	1	46	Ki3xOh7B	DRIL38.008	NA	NA	NA	NA	NA	NA	NA	NA
NLB	16797	2014	1	1	3	14	7	1	48	Ki3xOh7B	DRIL38.055	76	50	55	60	NA	28	15	55
NLB	16799	2014	1	1	3	14	9	1	50	Ki3xOh7B	DRIL38.056	NA	NA	NA	NA	NA	NA	NA	NA
NLB	16800	2014	1	1	3	14	10	1	51	Ki3xOh7B	DRIL38.185	NA	NA	NA	NA	NA	NA	NA	NA
NLB	16801	2014	1	1	3	14	11	1	52	Ki3xOh7B	DRIL38.105	NA	NA	NA	NA	NA	NA	NA	NA
NLB	16802	2014	1	1	3	14	12	1	53	Ki3xOh7B	DRIL38.189	NA	..	NA	NA	NA	NA	NA	NA
NLB	16803	2014	1	1	3	14	13	1	54	Ki3xOh7B	DRIL38.193	NA	NA	NA	NA	NA	NA	NA	NA
NLB	16804	2014	1	1	3	14	14	1	55	Ki3xOh7B	DRIL38.020	NA	NA	NA	NA	NA	NA	NA	NA
NLB	16805	2014	1	1	3	14	15	1	56	Ki3xOh7B	DRIL38.203	NA	NA	NA	NA	NA	NA	NA	NA
NLB	16806	2014	1	1	3	14	16	1	57	Ki3xOh7B	DRIL38.133	NA	NA	NA	NA	NA	NA	NA	NA
NLB	16807	2014	1	1	4	14	17	1	58	Ki3xOh7B	DRIL38.009	NA	NA	NA	NA	NA	NA	NA	NA
NLB	16808	2014	1	1	4	14	18	1	59	Ki3xOh7B	DRIL38.079	NA	NA	NA	NA	NA	NA	NA	NA
NLB	16809	2014	1	1	4	14	19	1	60	Ki3xOh7B	DRIL38.168	73	20	35	55	NA	18	60	36.3
NLB	16810	2014	1	1	4	14	20	1	61	Ki3xOh7B	DRIL38.172	75	25	35	55	NA	18	14	37.5
NLB	16811	2014	1	1	4	14	21	1	62	Ki3xOh7B	DRIL38.034	70	55	65	80	NA	30	16	66.3
NLB	16812	2014	1	1	4	14	22	1	63	Ki3xOh7B	DRIL38.031	74	50	60	75	NA	32	25	61.3
NLB	16814	2014	1	1	4	14	24	1	65	Ki3xOh7B	DRIL38.221	76	40	60	65	NA	28	11	56.3
NLB	16815	2014	1	1	4	14	25	1	66	Ki3xOh7B	DRIL38.223	70	35	45	60	NA	20	8	46.3
NLB	16816	2014	1	1	4	14	26	1	67	Ki3xOh7B	DRIL38.081	70	35	50	60	NA	32	17	48.8
NLB	16817	2014	1	1	4	14	27	1	68	Ki3xOh7B	DRIL38.068	73	40	55	70	NA	35	12	55
NLB	16818	2014	1	1	4	14	28	1	69	Ki3xOh7B	DRIL38.070	70	40	60	65	NA	33	23	56.3
NLB	16819	2014	1	1	4	15	28	1	70	Ki3xOh7B	DRIL38.208	70	45	55	65	NA	28	16	55
NLB	16820	2014	1	1	4	15	27	1	71	Ki3xOh7B	DRIL38.027	70	45	65	70	NA	40	32	61.3
NLB	16822	2014	1	1	4	15	25	1	73	Ki3xOh7B	DRIL38.115	73	50	60	70	NA	28	14	60
NLB	16823	2014	1	1	4	15	24	1	74	Ki3xOh7B	DRIL38.181	70	45	65	70	NA	28	2	61.3
NLB	16824	2014	1	1	4	15	23	1	75	Ki3xOh7B	DRIL38.136	73	40	50	55	NA	34	22	48.8
NLB	16825	2014	1	1	4	15	22	1	76	Ki3xOh7B	DRIL38.120	70	55	70	90	NA	36	18	71.3
NLB	16826	2014	1	1	5	15	21	1	77	Ki3xOh7B	DRIL38.007	74	50	60	65	NA	40	19	58.8
NLB	16827	2014	1	1	5	15	20	1	78	Ki3xOh7B	DRIL38.187	70	35	45	55	NA	33	15	45
NLB	16829	2014	1	1	5	15	18	1	80	Ki3xOh7B	DRIL38.077	NA	NA	NA	NA	NA	NA	NA	NA
NLB	16830	2014	1	1	5	15	17	1	81	Ki3xOh7B	DRIL38.145	76	45	50	65	NA	26	9	52.5
NLB	16831	2014	1	1	5	15	16	1	82	Ki3xOh7B	DRIL38.146	76	30	45	55	NA	20	60	43.8
NLB	16833	2014	1	1	5	15	14	1	84	Ki3xOh7B	DRIL38.033	NA	NA	NA	NA	NA	NA	NA	NA
NLB	16834	2014	1	1	5	15	13	1	85	Ki3xOh7B	DRIL38.170	NA	NA	NA	NA	NA	NA	NA	NA
NLB	16835	2014	1	1	5	15	12	1	86	Ki3xOh7B	DRIL38.060	NA	NA	NA	NA	NA	NA	NA	NA
NLB	16836	2014	1	1	5	15	11	1	87	Ki3xOh7B	DRIL38.128	NA	35	50	55	NA	17	4	47.5
NLB	16837	2014	1	1	5	15	10	1	88	Ki3xOh7B	DRIL38.053	NA	30	35	50	NA	24	5	37.5
NLB	16839	2014	1	1	5	15	8	1	90	Ki3xOh7B	DRIL38.023	NA	NA	NA	NA	NA	NA	NA	NA
NLB	16840	2014	1	1	5	15	7	1	91	Ki3xOh7B	DRIL38.227	76	35	40	55	NA	22	6	42.5
NLB	16841	2014	1	1	5	15	6	1	92	Ki3xOh7B	DRIL38.012	NA	NA	NA	NA	NA	NA	NA	NA
NLB	16842	2014	1	1	5	15	5	1	93	Ki3xOh7B	DRIL38.209	NA	NA	NA	NA	NA	NA	NA	NA
NLB	16843	2014	1	1	5	15	4	1	94	Ki3xOh7B	DRIL38.155	NA	35	45	65	NA	NA	4	47.5
NLB	16844	2014	1	1	5	15	3	1	95	Ki3xOh7B	DRIL38.004	NA	NA	NA	NA	NA	NA	NA	NA
NLB	16845	2014	1	1	6	15	2	1	96	Ki3xOh7B	DRIL38.054	NA	NA	NA	NA	NA	NA	NA	NA
NLB	16846	2014	1	1	6	15	1	1	97	Ki3xOh7B	DRIL38.073	NA	NA	NA	NA	NA	NA	NA	NA
NLB	16847	2014	1	1	6	16	1	1	98	Ki3xOh7B	DRIL38.169	NA	NA	NA	NA	NA	NA	NA	NA
NLB	16848	2014	1	1	6	16	2	1	99	Ki3xOh7B	DRIL38.147	NA	NA	NA	NA	NA	NA	NA	NA
NLB	16849	2014	1	1	6	16	3	1	100	Ki3xOh7B	DRIL38.175	NA	NA	NA	NA	NA	NA	NA	NA
NLB	16850	2014	1	1	6	16	4	1	101	Ki3xOh7B	DRIL38.112	NA	NA	NA	NA	NA	NA	NA	NA
NLB	16852	2014	1	1	6	16	6	1	103	Ki3xOh7B	DRIL38.049	NA	NA	NA	NA	NA	NA	NA	NA
NLB	16853	2014	1	1	6	16	7	1	104	Ki3xOh7B	DRIL38.036	NA	NA	NA	NA	NA	NA	NA	NA
NLB	16854	2014	1	1	6	16	8	1	105	Ki3xOh7B	DRIL38.110	NA	NA	NA	NA	NA	NA	NA	NA
NLB	16856	2014	1	1	6	16	10	1	107	Ki3xOh7B	DRIL38.037	NA	NA	NA	NA	NA	NA	NA	NA
NLB	16860	2014	1	1	6	16	14	1	111	Ki3xOh7B	DRIL38.202	NA	NA	NA	NA	NA	NA	NA	NA
NLB	16861	2014	1	1	6	16	15	1	112	Ki3xOh7B	DRIL38.086	NA	25	35	55	NA	24	56	37.5
NLB	16863	2014	1	1	6	16	17	1	114	Ki3xOh7B	DRIL38.226	73	35	45	60	NA	32	10	46.3
NLB	16864	2014	1	1	7	16	18	1	115	Ki3xOh7B	DRIL38.104	NA	NA	NA	NA	NA	NA	NA	NA
NLB	16865	2014	1	1	7	16	19	1	116	Ki3xOh7B	DRIL38.220	73	25	35	55	NA	22	59	37.5
NLB	16866	2014	1	1	7	16	20	1	117	Ki3xOh7B	DRIL38.026	73	50	65	80	NA	38	22	65
NLB	16867	2014	1	1	7	16	21	1	118	Ki3xOh7B	DRIL38.046	70	50	65	75	NA	36	18	63.8
NLB	16868	2014	1	1	7	16	22	1	119	Ki3xOh7B	DRIL38.205	71	45	50	65	NA	38	27	52.5
NLB	16869	2014	1	1	7	16	23	1	120	Ki3xOh7B	DRIL38.143	72	35	45	65	NA	36	22	47.5
NLB	16870	2014	1	1	7	16	24	1	121	Ki3xOh7B	DRIL38.010	69	55	70	65	NA	40	25	65
NLB	16872	2014	1	1	7	16	26	1	123	Ki3xOh7B	DRIL38.063	73	50	55	60	NA	24	8	55
NLB	16873	2014	1	1	7	16	27	1	124	Ki3xOh7B	DRIL38.075	70	55	70	80	NA	42	36	68.8
NLB	16874	2014	1	1	7	16	28	1	125	Ki3xOh7B	DRIL38.040	70	50	65	75	NA	32	13	63.8
NLB	16875	2014	1	1	7	17	28	1	126	Ki3xOh7B	DRIL38.201	71	45	45	50	NA	34	35	46.3
NLB	16876	2014	1	1	7	17	27	1	127	Ki3xOh7B	DRIL38.139	71	50	60	70	NA	38	21	60
NLB	16877	2014	1	1	7	17	26	1	128	Ki3xOh7B	DRIL38.153	71	45	60	70	NA	32	18	58.8
NLB	16879	2014	1	1	7	17	24	1	130	Ki3xOh7B	DRIL38.101	73	50	60	65	NA	38	25	58.8
NLB	16882	2014	1	1	7	17	21	1	133	Ki3xOh7B	DRIL38.171	70	45	50	60	NA	34	16	51.3
NLB	16884	2014	1	1	8	17	19	1	135	Ki3xOh7B	DRIL38.038	73	20	35	55	NA	30	12	36.3
NLB	16886	2014	1	1	8	17	17	1	137	Ki3xOh7B	DRIL38.131	73	35	55	65	NA	32	12	52.5
NLB	16887	2014	1	1	8	17	16	1	138	Ki3xOh7B	DRIL38.094	70	50	60	65	NA	31	13	58.8
NLB	16889	2014	1	1	8	17	14	1	140	Ki3xOh7B	DRIL38.062	70	20	35	60	NA	22	58	37.5
NLB	16890	2014	1	1	8	17	13	1	141	Ki3xOh7B	DRIL38.140	70	35	40	60	NA	28	7	43.8
NLB	16891	2014	1	1	8	17	12	1	142	Ki3xOh7B	DRIL38.163	NA	NA	NA	NA	NA	NA	NA	NA
NLB	16892	2014	1	1	8	17	11	1	143	Ki3xOh7B	DRIL38.206	NA	NA	NA	NA	NA	NA	NA	NA
NLB	16895	2014	1	1	8	17	8	1	146	Ki3xOh7B	DRIL38.109	NA	NA	NA	NA	NA	NA	NA	NA
NLB	16896	2014	1	1	8	17	7	1	147	Ki3xOh7B	DRIL38.134	NA	NA	NA	NA	NA	NA	NA	NA
NLB	16897	2014	1	1	8	17	6	1	148	Ki3xOh7B	DRIL38.178	NA	NA	NA	NA	NA	NA	NA	NA
NLB	16898	2014	1	1	8	17	5	1	149	Ki3xOh7B	DRIL38.050	NA	NA	NA	NA	NA	NA	NA	NA
NLB	16899	2014	1	1	8	17	4	1	150	Ki3xOh7B	DRIL38.014	NA	NA	NA	NA	NA	NA	NA	NA
NLB	16900	2014	1	1	8	17	3	1	151	Ki3xOh7B	DRIL38.045	NA	NA	NA	NA	NA	NA	NA	NA
NLB	16901	2014	1	1	8	17	2	1	152	Ki3xOh7B	DRIL38.057	NA	NA	NA	NA	NA	NA	NA	NA
NLB	16902	2014	1	1	9	17	1	1	153	Ki3xOh7B	DRIL38.047	NA	NA	NA	NA	NA	NA	NA	NA
NLB	16903	2014	1	1	9	18	1	1	154	Ki3xOh7B	DRIL38.229	NA	NA	NA	NA	NA	NA	NA	NA
NLB	16904	2014	1	1	9	18	2	1	155	Ki3xOh7B	DRIL38.048	NA	NA	NA	NA	NA	NA	NA	NA
NLB	16905	2014	1	1	9	18	3	1	156	Ki3xOh7B	DRIL38.156	NA	NA	NA	NA	NA	NA	NA	NA
NLB	16906	2014	1	1	9	18	4	1	157	Ki3xOh7B	DRIL38.078	NA	NA	NA	NA	NA	NA	NA	NA
NLB	16907	2014	1	1	9	18	5	1	158	Ki3xOh7B	DRIL38.058	NA	NA	NA	NA	NA	NA	NA	NA
NLB	16910	2014	1	1	9	18	8	1	161	Ki3xOh7B	DRIL38.194	NA	NA	NA	NA	NA	NA	NA	NA
NLB	16911	2014	1	1	9	18	9	1	162	Ki3xOh7B	DRIL38.080	76	35	40	65	NA	32	11	45
NLB	16913	2014	1	1	9	18	11	1	164	Ki3xOh7B	DRIL38.197	NA	NA	NA	NA	NA	NA	NA	NA
NLB	16914	2014	1	1	9	18	12	1	165	Ki3xOh7B	DRIL38.018	NA	NA	NA	NA	NA	NA	NA	NA
NLB	16915	2014	1	1	9	18	13	1	166	Ki3xOh7B	DRIL38.035	NA	NA	NA	NA	NA	NA	NA	NA
NLB	16916	2014	1	1	9	18	14	1	167	Ki3xOh7B	DRIL38.123	NA	NA	NA	NA	NA	NA	NA	NA
NLB	16917	2014	1	1	9	18	15	1	168	Ki3xOh7B	DRIL38.198	NA	NA	NA	NA	NA	NA	NA	NA
NLB	16918	2014	1	1	9	18	16	1	169	Ki3xOh7B	DRIL38.141	70	40	55	65	NA	34	17	53.8
NLB	16919	2014	1	1	9	18	17	1	170	Ki3xOh7B	DRIL38.064	70	55	60	70	NA	24	7	61.3
NLB	16920	2014	1	1	9	18	18	1	171	Ki3xOh7B	DRIL38.003	76	45	55	70	NA	30	12	56.3
NLB	16921	2014	1	1	10	18	19	1	172	Ki3xOh7B	DRIL38.059	76	35	55	60	NA	30	4	51.3
NLB	16922	2014	1	1	10	18	20	1	173	Ki3xOh7B	DRIL38.179	76	45	60	65	NA	28	6	57.5
NLB	16923	2014	1	1	10	18	21	1	174	Ki3xOh7B	DRIL38.230	70	30	35	55	NA	32	18	38.8
NLB	16924	2014	1	1	10	18	22	1	175	Ki3xOh7B	DRIL38.191	74	40	50	70	NA	34	18	52.5
NLB	16926	2014	1	1	10	18	24	1	177	Ki3xOh7B	DRIL38.089	73	55	80	90	NA	32	12	76.3
NLB	16927	2014	1	1	10	18	25	1	178	Ki3xOh7B	DRIL38.071	74	35	60	70	NA	32	18	56.3
NLB	16928	2014	1	1	10	18	26	1	179	Ki3xOh7B	DRIL38.210	70	35	45	55	NA	36	18	45
NLB	16929	2014	1	1	10	18	27	1	180	Ki3xOh7B	DRIL38.019	74	30	50	60	NA	32	16	47.5
NLB	16930	2014	1	1	10	18	28	1	181	Ki3xOh7B	DRIL38.066	73	50	65	70	NA	34	20	62.5
NLB	16931	2014	1	1	10	19	28	1	182	Ki3xOh7B	DRIL38.096	72	50	65	85	NA	40	25	66.3
NLB	16934	2014	1	1	10	19	25	1	185	Ki3xOh7B	DRIL38.217	70	45	45	60	NA	38	25	48.8
NLB	16935	2014	1	1	10	19	24	1	186	Ki3xOh7B	DRIL38.162	70	45	60	70	NA	36	18	58.8
NLB	16936	2014	1	1	10	19	23	1	187	Ki3xOh7B	DRIL38.108	70	40	50	65	NA	39	28	51.3
NLB	16937	2014	1	1	10	19	22	1	188	Ki3xOh7B	DRIL38.138	72	40	55	65	NA	42	26	53.8
NLB	16938	2014	1	1	10	19	21	1	189	Ki3xOh7B	DRIL38.186	70	35	50	65	NA	30	10	50
NLB	16939	2014	1	1	10	19	20	1	190	Ki3xOh7B	DRIL38.152	73	40	50	70	NA	30	17	52.5
NLB	16940	2014	1	1	11	19	19	1	191	Ki3xOh7B	DRIL38.084	76	35	40	55	NA	28	11	42.5
NLB	16942	2014	1	1	11	19	17	1	193	Ki3xOh7B	DRIL38.195	70	25	35	65	NA	30	14	40
NLB	16943	2014	1	1	11	19	16	1	194	Ki3xOh7B	DRIL38.188	70	20	40	55	NA	30	13	38.8
NLB	16945	2014	1	1	11	19	14	1	196	Ki3xOh7B	DRIL38.183	NA	NA	NA	NA	NA	NA	NA	NA
NLB	16946	2014	1	1	11	19	13	1	197	Ki3xOh7B	DRIL38.126	NA	NA	NA	NA	NA	NA	NA	NA
NLB	16947	2014	1	1	11	19	12	1	198	Ki3xOh7B	DRIL38.142	NA	NA	NA	NA	NA	NA	NA	NA
NLB	16948	2014	1	1	11	19	11	1	199	Ki3xOh7B	DRIL38.211	NA	NA	NA	NA	NA	NA	NA	NA
NLB	16950	2014	1	1	11	19	9	1	201	Ki3xOh7B	DRIL38.088	NA	NA	NA	NA	NA	NA	NA	NA
NLB	16951	2014	1	1	11	19	8	1	202	Ki3xOh7B	DRIL38.196	NA	NA	NA	NA	NA	NA	NA	NA
NLB	16952	2014	1	1	11	19	7	1	203	Ki3xOh7B	DRIL38.177	NA	NA	NA	NA	NA	NA	NA	NA
NLB	16953	2014	1	1	11	19	6	1	204	Ki3xOh7B	DRIL38.207	NA	NA	NA	NA	NA	NA	NA	NA
NLB	16954	2014	1	1	11	19	5	1	205	Ki3xOh7B	DRIL38.184	NA	NA	NA	NA	NA	NA	NA	NA
NLB	16955	2014	1	1	11	19	4	1	206	Ki3xOh7B	DRIL38.030	NA	NA	NA	NA	NA	NA	NA	NA
NLB	16956	2014	1	1	11	19	3	1	207	Ki3xOh7B	DRIL38.032	NA	NA	NA	NA	NA	NA	NA	NA
NLB	16957	2014	1	1	11	19	2	1	208	Ki3xOh7B	DRIL38.144	NA	NA	NA	NA	NA	NA	NA	NA
NLB	16959	2014	1	1	12	20	1	1	210	Ki3xOh7B	DRIL38.150	NA	NA	NA	NA	NA	NA	NA	NA
NLB	16960	2014	1	1	12	20	2	1	211	Ki3xOh7B	DRIL38.125	NA	NA	NA	NA	NA	NA	NA	NA
NLB	16961	2014	1	1	12	20	3	1	212	Ki3xOh7B	DRIL38.149	NA	NA	NA	NA	NA	NA	NA	NA
NLB	16962	2014	1	1	12	20	4	1	213	Ki3xOh7B	DRIL38.119	NA	NA	NA	NA	NA	NA	NA	NA
NLB	16963	2014	1	1	12	20	5	1	214	Ki3xOh7B	DRIL38.093	NA	NA	NA	NA	NA	NA	NA	NA
NLB	16965	2014	1	1	12	20	7	1	216	Ki3xOh7B	DRIL38.011	NA	NA	NA	NA	NA	NA	NA	NA
NLB	16967	2014	1	1	12	20	9	1	218	Ki3xOh7B	DRIL38.074	NA	NA	NA	NA	NA	NA	NA	NA
NLB	16969	2014	1	1	12	20	11	1	220	Ki3xOh7B	DRIL38.225	NA	NA	NA	NA	NA	NA	NA	NA
NLB	16971	2014	1	1	12	20	13	1	222	Ki3xOh7B	DRIL38.117	NA	NA	NA	NA	NA	NA	NA	NA
NLB	16973	2014	1	1	12	20	15	1	224	Ki3xOh7B	DRIL38.076	76	25	40	55	NA	30	26	40
NLB	16974	2014	1	1	12	20	16	1	225	Ki3xOh7B	DRIL38.028	70	40	50	75	NA	40	28	53.8
NLB	16975	2014	1	1	12	20	17	1	226	Ki3xOh7B	DRIL38.192	70	40	50	70	NA	38	25	52.5
NLB	16976	2014	1	1	12	20	18	1	227	Ki3xOh7B	DRIL38.067	70	40	55	65	NA	32	23	53.8
NLB	16977	2014	1	1	12	20	19	1	228	Ki3xOh7B	DRIL38.090	NA	NA	NA	NA	NA	NA	NA	NA
NLB	16978	2014	1	1	13	20	20	1	229	Ki3xOh7B	DRIL38.029	72	55	60	70	NA	38	17	61.3
NLB	16980	2014	1	1	13	20	22	1	231	Ki3xOh7B	DRIL38.167	73	50	55	65	NA	24	21	56.3
NLB	16981	2014	1	1	13	20	23	1	232	Ki3xOh7B	DRIL38.151	73	55	65	75	NA	40	16	65
NLB	16982	2014	1	1	13	20	24	1	233	Ki3xOh7B	DRIL38.159	73	45	60	70	NA	36	26	58.8
NLB	16984	2014	1	1	13	20	26	1	235	Ki3xOh7B	DRIL38.160	71	50	55	70	NA	43	32	57.5
NLB	16985	2014	1	1	13	20	27	1	236	Ki3xOh7B	DRIL38.016	70	45	55	70	NA	32	25	56.3
NLB	16987	2014	1	1	13	21	28	1	238	Ki3xOh7B	DRIL38.043	70	30	45	60	NA	41	23	45
NLB	16990	2014	1	1	13	21	25	1	241	Ki3xOh7B	DRIL38.021	73	55	60	75	NA	42	23	62.5
NLB	16991	2014	1	1	13	21	24	1	242	Ki3xOh7B	DRIL38.044	70	50	65	85	NA	42	27	66.3
NLB	16992	2014	1	1	13	21	23	1	243	Ki3xOh7B	DRIL38.024	73	45	50	65	NA	30	16	52.5
NLB	16993	2014	1	1	13	21	22	1	244	Ki3xOh7B	DRIL38.106	71	40	55	60	NA	28	15	52.5
NLB	16994	2014	1	1	13	21	21	1	245	Ki3xOh7B	DRIL38.214	73	20	45	60	NA	36	18	42.5
NLB	16995	2014	1	1	13	21	20	1	246	Ki3xOh7B	DRIL38.132	70	55	65	80	NA	38	27	66.3
NLB	16996	2014	1	1	13	21	19	1	247	Ki3xOh7B	DRIL38.001	NA	NA	NA	NA	NA	NA	NA	NA
NLB	16997	2014	1	1	14	21	18	1	248	Ki3xOh7B	DRIL38.224	71	55	65	85	NA	34	18	67.5
NLB	16999	2014	1	1	14	21	16	1	250	Ki3xOh7B	DRIL38.083	70	50	55	60	NA	34	22	55
NLB	17000	2014	1	1	14	21	15	1	251	Ki3xOh7B	DRIL38.231	66	40	55	65	NA	40	25	53.8
NLB	17001	2014	1	1	14	21	14	1	252	Ki3xOh7B	DRIL38.061	73	40	50	65	NA	36	20	51.3
NLB	17003	2014	1	1	14	21	12	1	254	Ki3xOh7B	DRIL38.218	74	30	30	50	NA	22	10	35
NLB	17005	2014	1	1	14	21	10	1	256	Ki3xOh7B	DRIL38.052	74	55	65	85	NA	NA	NA	67.5
NLB	17006	2014	1	1	14	21	9	1	257	Ki3xOh7B	DRIL38.025	71	45	60	80	NA	28	4	61.3
NLB	17007	2014	1	1	14	21	8	1	258	Ki3xOh7B	DRIL38.190	76	20	30	50	NA	30	14	32.5
NLB	17008	2014	1	1	14	21	7	1	259	Ki3xOh7B	DRIL38.116	NA	NA	NA	NA	NA	20	58	NA
NLB	17009	2014	1	1	14	21	6	1	260	Ki3xOh7B	DRIL38.082	NA	NA	NA	NA	NA	NA	NA	NA
NLB	17010	2014	1	1	14	21	5	1	261	Ki3xOh7B	DRIL38.065	NA	NA	NA	NA	NA	NA	NA	NA
NLB	17011	2014	1	1	14	21	4	1	262	Ki3xOh7B	DRIL38.157	NA	NA	NA	NA	NA	NA	NA	NA
NLB	17014	2014	1	1	14	21	1	1	265	Ki3xOh7B	DRIL38.095	NA	NA	NA	NA	NA	NA	NA	NA
NLB	17015	2014	1	1	14	22	1	1	266	Ki3xOh7B	DRIL38.219	NA	NA	NA	NA	NA	NA	NA	NA
NLB	21507	2014	1	2	1	22	16	1	267	Ki3xOh7B	DRIL38.181	75	50	55	85	NA	34	13	60
NLB	21508	2014	1	2	1	22	17	1	268	Ki3xOh7B	DRIL38.077	72	45	55	75	NA	30	18	56.4
NLB	21509	2014	1	2	1	22	18	1	269	Ki3xOh7B	DRIL38.022	NA	NA	NA	NA	NA	NA	NA	NA
NLB	21511	2014	1	2	1	22	20	1	271	Ki3xOh7B	DRIL38.068	75	50	55	85	NA	36	17	60
NLB	21513	2014	1	2	1	22	22	1	273	Ki3xOh7B	DRIL38.131	NA	NA	NA	NA	NA	NA	NA	NA
NLB	21515	2014	1	2	1	22	24	1	275	Ki3xOh7B	DRIL38.144	77	45	55	75	NA	34	20	56.4
NLB	21516	2014	1	2	1	22	25	1	276	Ki3xOh7B	DRIL38.133	76	50	50	75	NA	34	12	55.4
NLB	21517	2014	1	2	1	22	26	1	277	Ki3xOh7B	DRIL38.110	77	50	55	80	NA	30	8	58.9
NLB	21518	2014	1	2	1	22	27	1	278	Ki3xOh7B	DRIL38.126	77	40	55	70	NA	38	20	53.9
NLB	21519	2014	1	2	1	22	28	1	279	Ki3xOh7B	DRIL38.186	72	40	55	70	NA	28	15	53.9
NLB	21521	2014	1	2	1	23	27	1	281	Ki3xOh7B	DRIL38.067	76	40	45	70	NA	32	15	48.9
NLB	21522	2014	1	2	1	23	26	1	282	Ki3xOh7B	DRIL38.171	76	35	45	70	NA	26	6	47.5
NLB	21523	2014	1	2	1	23	25	1	283	Ki3xOh7B	DRIL38.190	75	35	50	70	NA	NA	58	50
NLB	21524	2014	1	2	1	23	24	1	284	Ki3xOh7B	DRIL38.048	76	40	45	75	NA	32	8	50
NLB	21526	2014	1	2	2	23	22	1	286	Ki3xOh7B	DRIL38.029	74	55	55	90	NA	38	17	62.5
NLB	21527	2014	1	2	2	23	21	1	287	Ki3xOh7B	DRIL38.169	72	40	45	65	NA	38	23	47.9
NLB	21528	2014	1	2	2	23	20	1	288	Ki3xOh7B	DRIL38.205	76	40	50	70	NA	NA	17	51.4
NLB	21529	2014	1	2	2	23	19	1	289	Ki3xOh7B	DRIL38.162	74	50	55	85	NA	38	20	60
NLB	21530	2014	1	2	2	23	18	1	290	Ki3xOh7B	DRIL38.167	72	50	55	75	NA	39	31	57.9
NLB	21531	2014	1	2	2	23	17	1	291	Ki3xOh7B	DRIL38.070	74	50	55	70	NA	38	21	56.8
NLB	21532	2014	1	2	2	23	16	1	292	Ki3xOh7B	DRIL38.017	71	35	45	65	NA	36	17	46.4
NLB	21534	2014	1	2	2	23	14	1	294	Ki3xOh7B	DRIL38.095	74	50	55	80	NA	36	20	58.9
NLB	21535	2014	1	2	2	23	13	1	295	Ki3xOh7B	DRIL38.178	71	45	55	75	NA	38	31	56.4
NLB	21536	2014	1	2	2	23	12	1	296	Ki3xOh7B	DRIL38.192	66	55	65	75	NA	38	33	64.3
NLB	21537	2014	1	2	2	23	11	1	297	Ki3xOh7B	DRIL38.155	71	55	65	90	NA	42	28	67.5
NLB	21538	2014	1	2	2	23	10	1	298	Ki3xOh7B	DRIL38.113	72	50	60	75	NA	30	14	60.4
NLB	21539	2014	1	2	2	23	9	1	299	Ki3xOh7B	DRIL38.142	74	50	55	70	NA	44	30	56.8
NLB	21541	2014	1	2	2	23	7	1	301	Ki3xOh7B	DRIL38.127	74	45	50	75	NA	44	25	53.9
NLB	21543	2014	1	2	2	23	5	1	303	Ki3xOh7B	DRIL38.197	72	25	35	65	NA	36	30	38.6
NLB	21544	2014	1	2	2	23	4	1	304	Ki3xOh7B	DRIL38.220	74	15	30	60	NA	40	23	32.1
NLB	21545	2014	1	2	3	23	3	1	305	Ki3xOh7B	DRIL38.073	74	45	55	75	NA	42	21	56.4
NLB	21546	2014	1	2	3	23	2	1	306	Ki3xOh7B	DRIL38.184	71	45	50	70	NA	34	18	52.9
NLB	21547	2014	1	2	3	23	1	1	307	Ki3xOh7B	DRIL38.229	71	55	75	95	NA	36	27	73.6
NLB	21548	2014	1	2	3	24	1	1	308	Ki3xOh7B	DRIL38.217	71	45	50	65	NA	41	30	51.8
NLB	21549	2014	1	2	3	24	2	1	309	Ki3xOh7B	DRIL38.160	74	50	55	75	NA	32	27	57.9
NLB	21551	2014	1	2	3	24	4	1	311	Ki3xOh7B	DRIL38.035	74	35	55	70	NA	38	23	52.5
NLB	21553	2014	1	2	3	24	6	1	313	Ki3xOh7B	DRIL38.148	74	50	55	90	NA	40	20	61.1
NLB	21554	2014	1	2	3	24	7	1	314	Ki3xOh7B	DRIL38.063	75	45	55	65	NA	34	15	54.3
NLB	21555	2014	1	2	3	24	8	1	315	Ki3xOh7B	DRIL38.061	75	40	60	90	NA	32	18	60.7
NLB	21557	2014	1	2	3	24	10	1	317	Ki3xOh7B	DRIL38.060	72	50	60	80	NA	42	32	61.4
NLB	21558	2014	1	2	3	24	11	1	318	Ki3xOh7B	DRIL38.111	71	45	65	75	NA	NA	NA	61.4
NLB	21559	2014	1	2	3	24	12	1	319	Ki3xOh7B	DRIL38.074	71	50	65	85	NA	5	38	65
NLB	21560	2014	1	2	3	24	13	1	320	Ki3xOh7B	DRIL38.027	71	50	65	75	NA	8	43	62.9
NLB	21561	2014	1	2	3	24	14	1	321	Ki3xOh7B	DRIL38.062	72	50	55	75	NA	42	32	57.9
NLB	21563	2014	1	2	3	24	16	1	323	Ki3xOh7B	DRIL38.023	71	50	60	85	NA	42	27	62.5
NLB	21564	2014	1	2	4	24	17	1	324	Ki3xOh7B	DRIL38.107	71	55	65	80	NA	43	31	65.4
NLB	21565	2014	1	2	4	24	18	1	325	Ki3xOh7B	DRIL38.219	72	5	10	40	NA	34	17	15
NLB	21566	2014	1	2	4	24	19	1	326	Ki3xOh7B	DRIL38.158	73	40	55	70	NA	36	26	53.9
NLB	21568	2014	1	2	4	24	21	1	328	Ki3xOh7B	DRIL38.108	71	50	60	80	NA	36	27	61.4
NLB	21569	2014	1	2	4	24	22	1	329	Ki3xOh7B	DRIL38.085	75	50	60	85	NA	42	32	62.5
NLB	21571	2014	1	2	4	24	24	1	331	Ki3xOh7B	DRIL38.185	74	50	55	80	NA	39	16	58.9
NLB	21573	2014	1	2	4	24	26	1	333	Ki3xOh7B	DRIL38.109	NA	NA	NA	NA	NA	NA	NA	NA
NLB	21574	2014	1	2	4	24	27	1	334	Ki3xOh7B	DRIL38.221	74	40	45	75	NA	24	11	50
NLB	21576	2014	1	2	4	25	28	1	336	Ki3xOh7B	DRIL38.064	76	40	55	75	NA	28	7	55
NLB	21577	2014	1	2	4	25	27	1	337	Ki3xOh7B	DRIL38.218	75	20	35	60	NA	36	17	36.1
NLB	21578	2014	1	2	4	25	26	1	338	Ki3xOh7B	DRIL38.016	77	35	40	75	NA	28	14	46.1
NLB	21579	2014	1	2	4	25	25	1	339	Ki3xOh7B	DRIL38.089	NA	NA	NA	NA	NA	NA	49	NA
NLB	21580	2014	1	2	4	25	24	1	340	Ki3xOh7B	DRIL38.195	78	35	45	60	NA	24	4	45.4
NLB	21581	2014	1	2	4	25	23	1	341	Ki3xOh7B	DRIL38.125	71	35	50	85	NA	39	16	53.2
NLB	21582	2014	1	2	4	25	22	1	342	Ki3xOh7B	DRIL38.146	75	50	55	75	NA	36	20	57.9
NLB	21583	2014	1	2	5	25	21	1	343	Ki3xOh7B	DRIL38.122	NA	NA	NA	NA	NA	NA	NA	NA
NLB	21584	2014	1	2	5	25	20	1	344	Ki3xOh7B	DRIL38.151	76	45	60	80	NA	36	17	60
NLB	21585	2014	1	2	5	25	19	1	345	Ki3xOh7B	DRIL38.119	71	45	60	80	NA	39	18	60
NLB	21586	2014	1	2	5	25	18	1	346	Ki3xOh7B	DRIL38.045	74	45	55	75	NA	36	17	56.4
NLB	21589	2014	1	2	5	25	15	1	349	Ki3xOh7B	DRIL38.091	75	50	65	90	NA	40	25	66.1
NLB	21590	2014	1	2	5	25	14	1	350	Ki3xOh7B	DRIL38.057	77	50	60	90	NA	32	18	63.6
NLB	21591	2014	1	2	5	25	13	1	351	Ki3xOh7B	DRIL38.207	71	55	65	90	NA	36	34	67.5
NLB	21593	2014	1	2	5	25	11	1	353	Ki3xOh7B	DRIL38.208	71	50	55	95	NA	34	23	62.1
NLB	21594	2014	1	2	5	25	10	1	354	Ki3xOh7B	DRIL38.026	72	50	55	80	NA	40	28	58.9
NLB	21595	2014	1	2	5	25	9	1	355	Ki3xOh7B	DRIL38.230	76	20	40	60	NA	30	17	38.6
NLB	21596	2014	1	2	5	25	8	1	356	Ki3xOh7B	DRIL38.166	72	55	65	90	NA	38	28	67.5
NLB	21597	2014	1	2	5	25	7	1	357	Ki3xOh7B	DRIL38.033	71	55	60	80	NA	28	20	62.9
NLB	21599	2014	1	2	5	25	5	1	359	Ki3xOh7B	DRIL38.041	72	35	40	85	NA	30	13	48.2
NLB	21600	2014	1	2	5	25	4	1	360	Ki3xOh7B	DRIL38.072	75	45	55	90	NA	32	15	59.6
NLB	21601	2014	1	2	5	25	3	1	361	Ki3xOh7B	DRIL38.058	71	45	55	80	NA	37	20	57.5
NLB	21602	2014	1	2	6	25	2	1	362	Ki3xOh7B	DRIL38.227	75	50	55	75	NA	42	26	57.9
NLB	21604	2014	1	2	6	26	1	1	364	Ki3xOh7B	DRIL38.093	70	45	55	85	NA	3	40	58.6
NLB	21605	2014	1	2	6	26	2	1	365	Ki3xOh7B	DRIL38.175	75	30	35	40	NA	36	25	34.6
NLB	21606	2014	1	2	6	26	3	1	366	Ki3xOh7B	DRIL38.226	71	35	45	70	NA	38	33	47.5
NLB	21608	2014	1	2	6	26	5	1	368	Ki3xOh7B	DRIL38.088	72	50	65	80	NA	39	21	63.9
NLB	21609	2014	1	2	6	26	6	1	369	Ki3xOh7B	DRIL38.194	72	50	55	75	NA	42	27	57.9
NLB	21610	2014	1	2	6	26	7	1	370	Ki3xOh7B	DRIL38.139	72	50	60	80	NA	40	19	61.4
NLB	21612	2014	1	2	6	26	9	1	372	Ki3xOh7B	DRIL38.123	74	45	50	80	NA	39	22	55
NLB	21613	2014	1	2	6	26	10	1	373	Ki3xOh7B	DRIL38.020	74	45	55	70	NA	32	22	55.4
NLB	21615	2014	1	2	6	26	12	1	375	Ki3xOh7B	DRIL38.079	72	50	55	90	NA	32	25	61.1
NLB	21617	2014	1	2	6	26	14	1	377	Ki3xOh7B	DRIL38.152	72	40	55	85	NA	32	16	57.1
NLB	21618	2014	1	2	6	26	15	1	378	Ki3xOh7B	DRIL38.214	76	30	50	80	NA	30	9	50.7
NLB	21619	2014	1	2	6	26	16	1	379	Ki3xOh7B	DRIL38.206	72	45	55	80	NA	36	26	57.5
NLB	21620	2014	1	2	6	26	17	1	380	Ki3xOh7B	DRIL38.006	72	50	55	80	NA	40	22	58.9
NLB	21621	2014	1	2	7	26	18	1	381	Ki3xOh7B	DRIL38.032	72	40	55	75	NA	43	31	55
NLB	21622	2014	1	2	7	26	19	1	382	Ki3xOh7B	DRIL38.105	74	50	55	90	NA	42	22	61.1
NLB	21623	2014	1	2	7	26	20	1	383	Ki3xOh7B	DRIL38.047	77	50	55	90	NA	33	8	61.1
NLB	21625	2014	1	2	7	26	22	1	385	Ki3xOh7B	DRIL38.145	NA	NA	NA	NA	NA	NA	NA	NA
NLB	21626	2014	1	2	7	26	23	1	386	Ki3xOh7B	DRIL38.040	74	40	50	85	NA	28	9	54.6
NLB	21627	2014	1	2	7	26	24	1	387	Ki3xOh7B	DRIL38.083	75	35	40	65	NA	26	11	43.9
NLB	21629	2014	1	2	7	26	26	1	389	Ki3xOh7B	DRIL38.014	75	45	50	85	NA	30	16	56.1
NLB	21631	2014	1	2	7	26	28	1	391	Ki3xOh7B	DRIL38.153	76	45	50	90	NA	26	5	57.1
NLB	21632	2014	1	2	7	27	28	1	392	Ki3xOh7B	DRIL38.232	74	45	50	80	NA	24	59	55
NLB	21633	2014	1	2	7	27	27	1	393	Ki3xOh7B	DRIL38.138	72	40	55	90	NA	30	10	58.2
NLB	21634	2014	1	2	7	27	26	1	394	Ki3xOh7B	DRIL38.130	NA	NA	NA	NA	NA	NA	NA	NA
NLB	21635	2014	1	2	7	27	25	1	395	Ki3xOh7B	DRIL38.053	74	40	45	70	NA	30	15	48.9
NLB	21637	2014	1	2	7	27	23	1	397	Ki3xOh7B	DRIL38.168	72	40	55	90	NA	26	9	58.2
NLB	21638	2014	1	2	7	27	22	1	398	Ki3xOh7B	DRIL38.044	77	50	55	85	NA	32	12	60
NLB	21639	2014	1	2	7	27	21	1	399	Ki3xOh7B	DRIL38.149	74	50	55	85	NA	34	16	60
NLB	21641	2014	1	2	8	27	19	1	401	Ki3xOh7B	DRIL38.198	77	40	50	70	NA	35	9	51.4
NLB	21643	2014	1	2	8	27	17	1	403	Ki3xOh7B	DRIL38.128	72	50	55	90	NA	32	18	61.1
NLB	21644	2014	1	2	8	27	16	1	404	Ki3xOh7B	DRIL38.201	77	30	35	60	NA	44	36	38.9
NLB	21645	2014	1	2	8	27	15	1	405	Ki3xOh7B	DRIL38.225	74	30	35	65	NA	32	13	40
NLB	21647	2014	1	2	8	27	13	1	407	Ki3xOh7B	DRIL38.231	67	35	50	90	NA	38	32	54.3
NLB	21648	2014	1	2	8	27	12	1	408	Ki3xOh7B	DRIL38.009	74	55	55	80	NA	40	31	60.4
NLB	21649	2014	1	2	8	27	11	1	409	Ki3xOh7B	DRIL38.176	74	20	35	65	NA	30	16	37.1
NLB	21650	2014	1	2	8	27	10	1	410	Ki3xOh7B	DRIL38.081	71	50	60	90	NA	40	26	63.6
NLB	21651	2014	1	2	8	27	9	1	411	Ki3xOh7B	DRIL38.036	71	50	60	85	NA	36	30	62.5
NLB	21655	2014	1	2	8	27	5	1	415	Ki3xOh7B	DRIL38.019	71	25	40	65	NA	36	31	41.1
NLB	21656	2014	1	2	8	27	4	1	416	Ki3xOh7B	DRIL38.134	72	35	50	70	NA	35	22	50
NLB	21657	2014	1	2	8	27	3	1	417	Ki3xOh7B	DRIL38.051	72	35	45	70	NA	38	32	47.5
NLB	21658	2014	1	2	8	27	2	1	418	Ki3xOh7B	DRIL38.180	NA	NA	NA	NA	NA	NA	NA	NA
NLB	21659	2014	1	2	9	27	1	1	419	Ki3xOh7B	DRIL38.118	74	50	65	85	NA	38	17	65
NLB	21660	2014	1	2	9	28	1	1	420	Ki3xOh7B	DRIL38.011	71	50	65	85	NA	6	43	65
NLB	21661	2014	1	2	9	28	2	1	421	Ki3xOh7B	DRIL38.179	74	35	60	75	NA	42	30	56.1
NLB	21662	2014	1	2	9	28	3	1	422	Ki3xOh7B	DRIL38.199	70	35	45	70	NA	38	23	47.5
NLB	21663	2014	1	2	9	28	4	1	423	Ki3xOh7B	DRIL38.003	71	45	50	70	NA	40	22	52.9
NLB	21665	2014	1	2	9	28	6	1	425	Ki3xOh7B	DRIL38.140	71	50	55	75	NA	36	26	57.9
NLB	21668	2014	1	2	9	28	9	1	428	Ki3xOh7B	DRIL38.043	73	45	45	65	NA	32	23	49.3
NLB	21669	2014	1	2	9	28	10	1	429	Ki3xOh7B	DRIL38.030	72	45	50	85	NA	36	22	56.1
NLB	21672	2014	1	2	9	28	13	1	432	Ki3xOh7B	DRIL38.025	71	40	55	95	NA	32	16	59.3
NLB	21673	2014	1	2	9	28	14	1	433	Ki3xOh7B	DRIL38.188	71	50	60	90	NA	34	30	63.6
NLB	21674	2014	1	2	9	28	15	1	434	Ki3xOh7B	DRIL38.209	71	50	60	80	NA	44	25	61.4
NLB	21675	2014	1	2	9	28	16	1	435	Ki3xOh7B	DRIL38.136	74	35	55	75	NA	40	31	53.6
NLB	21676	2014	1	2	9	28	17	1	436	Ki3xOh7B	DRIL38.202	74	35	45	65	NA	30	18	46.4
NLB	21677	2014	1	2	9	28	18	1	437	Ki3xOh7B	DRIL38.104	71	50	60	90	NA	38	23	63.6
NLB	21678	2014	1	2	10	28	19	1	438	Ki3xOh7B	DRIL38.103	77	50	60	85	NA	36	19	62.5
NLB	21679	2014	1	2	10	28	20	1	439	Ki3xOh7B	DRIL38.172	76	40	55	70	NA	23	4	53.9
NLB	21680	2014	1	2	10	28	21	1	440	Ki3xOh7B	DRIL38.038	77	50	55	75	NA	NA	5	57.9
NLB	21681	2014	1	2	10	28	22	1	441	Ki3xOh7B	DRIL38.189	77	50	55	85	NA	NA	3	60
NLB	21682	2014	1	2	10	28	23	1	442	Ki3xOh7B	DRIL38.223	77	50	70	90	NA	NA	58	68.6
NLB	21683	2014	1	2	10	28	24	1	443	Ki3xOh7B	DRIL38.018	75	30	45	65	NA	36	17	45
NLB	21686	2014	1	2	10	28	27	1	446	Ki3xOh7B	DRIL38.187	74	30	40	70	NA	26	8	43.6
NLB	21687	2014	1	2	10	28	28	1	447	Ki3xOh7B	DRIL38.129	76	45	55	85	NA	26	7	58.6
NLB	21688	2014	1	2	10	29	28	1	448	Ki3xOh7B	DRIL38.191	76	50	55	85	NA	34	17	60
NLB	21689	2014	1	2	10	29	27	1	449	Ki3xOh7B	DRIL38.052	75	50	60	85	NA	34	11	62.5
NLB	21691	2014	1	2	10	29	25	1	451	Ki3xOh7B	DRIL38.106	74	45	50	85	NA	28	11	56.1
NLB	21693	2014	1	2	10	29	23	1	453	Ki3xOh7B	DRIL38.010	72	50	55	85	NA	35	18	60
NLB	21694	2014	1	2	10	29	22	1	454	Ki3xOh7B	DRIL38.054	73	45	55	85	NA	35	22	58.6
NLB	21695	2014	1	2	10	29	21	1	455	Ki3xOh7B	DRIL38.078	78	50	55	80	NA	NA	6	58.9
NLB	21696	2014	1	2	10	29	20	1	456	Ki3xOh7B	DRIL38.028	75	45	60	90	NA	34	15	62.1
NLB	21697	2014	1	2	11	29	19	1	457	Ki3xOh7B	DRIL38.049	71	50	65	95	NA	31	20	67.1
NLB	21698	2014	1	2	11	29	18	1	458	Ki3xOh7B	DRIL38.050	71	50	65	80	NA	40	26	63.9
NLB	21699	2014	1	2	11	29	17	1	459	Ki3xOh7B	DRIL38.015	74	50	65	85	NA	38	18	65
NLB	21700	2014	1	2	11	29	16	1	460	Ki3xOh7B	DRIL38.115	74	50	65	80	NA	36	20	63.9
NLB	21701	2014	1	2	11	29	15	1	461	Ki3xOh7B	DRIL38.196	76	50	60	80	NA	30	10	61.4
NLB	21702	2014	1	2	11	29	14	1	462	Ki3xOh7B	DRIL38.170	75	40	40	65	NA	36	13	45.4
NLB	21704	2014	1	2	11	29	12	1	464	Ki3xOh7B	DRIL38.071	NA	NA	NA	NA	NA	18	55	NA
NLB	21705	2014	1	2	11	29	11	1	465	Ki3xOh7B	DRIL38.069	72	50	65	90	NA	38	20	66.1
NLB	21706	2014	1	2	11	29	10	1	466	Ki3xOh7B	DRIL38.101	65	45	55	75	NA	40	28	56.4
NLB	21709	2014	1	2	11	29	7	1	469	Ki3xOh7B	DRIL38.090	74	50	65	90	NA	44	30	66.1
NLB	21710	2014	1	2	11	29	6	1	470	Ki3xOh7B	DRIL38.082	71	50	60	70	NA	34	22	59.3
NLB	21711	2014	1	2	11	29	5	1	471	Ki3xOh7B	DRIL38.132	71	45	55	75	NA	38	28	56.4
NLB	21714	2014	1	2	11	29	2	1	474	Ki3xOh7B	DRIL38.056	70	55	70	95	NA	3	37	71.1
NLB	21716	2014	1	2	12	30	1	1	476	Ki3xOh7B	DRIL38.007	73	50	65	80	NA	3	21	63.9
NLB	21717	2014	1	2	12	30	2	1	477	Ki3xOh7B	DRIL38.141	71	50	65	80	NA	9	41	63.9
NLB	21718	2014	1	2	12	30	3	1	478	Ki3xOh7B	DRIL38.024	72	40	40	70	NA	38	33	46.4
NLB	21719	2014	1	2	12	30	4	1	479	Ki3xOh7B	DRIL38.177	NA	NA	NA	NA	NA	NA	NA	NA
NLB	21720	2014	1	2	12	30	5	1	480	Ki3xOh7B	DRIL38.120	71	45	55	70	NA	40	33	55.4
NLB	21721	2014	1	2	12	30	6	1	481	Ki3xOh7B	DRIL38.008	72	45	55	75	NA	30	22	56.4
NLB	21722	2014	1	2	12	30	7	1	482	Ki3xOh7B	DRIL38.059	74	35	45	65	NA	38	20	46.4
NLB	21723	2014	1	2	12	30	8	1	483	Ki3xOh7B	DRIL38.150	70	35	50	90	NA	37	30	54.3
NLB	21724	2014	1	2	12	30	9	1	484	Ki3xOh7B	DRIL38.216	66	50	60	90	NA	40	20	63.6
NLB	21725	2014	1	2	12	30	10	1	485	Ki3xOh7B	DRIL38.055	74	35	55	70	NA	3	25	52.5
NLB	21727	2014	1	2	12	30	12	1	487	Ki3xOh7B	DRIL38.137	71	45	65	75	NA	34	21	61.4
NLB	21728	2014	1	2	12	30	13	1	488	Ki3xOh7B	DRIL38.066	71	45	65	75	NA	38	26	61.4
NLB	21729	2014	1	2	12	30	14	1	489	Ki3xOh7B	DRIL38.224	72	55	65	85	NA	44	28	66.4
NLB	21730	2014	1	2	12	30	15	1	490	Ki3xOh7B	DRIL38.147	74	50	65	85	NA	38	16	65
NLB	21732	2014	1	2	12	30	17	1	492	Ki3xOh7B	DRIL38.183	71	45	55	90	NA	37	20	59.6
NLB	21733	2014	1	2	12	30	18	1	493	Ki3xOh7B	DRIL38.163	71	45	60	90	NA	38	30	62.1
NLB	21734	2014	1	2	12	30	19	1	494	Ki3xOh7B	DRIL38.046	71	45	65	90	NA	38	27	64.6
NLB	21735	2014	1	2	13	30	20	1	495	Ki3xOh7B	DRIL38.114	74	35	45	70	NA	36	30	47.5
NLB	21737	2014	1	2	13	30	22	1	497	Ki3xOh7B	DRIL38.034	70	50	6	80	NA	42	26	34.4
NLB	21738	2014	1	2	13	30	23	1	498	Ki3xOh7B	DRIL38.037	71	40	5	85	NA	40	36	32.1
NLB	21739	2014	1	2	13	30	24	1	499	Ki3xOh7B	DRIL38.193	71	55	65	95	NA	40	39	68.6
NLB	21740	2014	1	2	13	30	25	1	500	Ki3xOh7B	DRIL38.080	73	45	70	75	NA	5	34	63.9
NLB	21742	2014	1	2	13	30	27	1	502	Ki3xOh7B	DRIL38.211	72	45	45	75	NA	32	18	51.4
NLB	21744	2014	1	2	13	31	28	1	504	Ki3xOh7B	DRIL38.096	75	40	50	65	NA	26	4	50.4
NLB	21745	2014	1	2	13	31	27	1	505	Ki3xOh7B	DRIL38.075	75	50	50	80	NA	32	10	56.4
NLB	21746	2014	1	2	13	31	26	1	506	Ki3xOh7B	DRIL38.076	75	50	55	90	NA	22	15	61.1
NLB	21748	2014	1	2	13	31	24	1	508	Ki3xOh7B	DRIL38.203	70	40	55	70	NA	42	33	53.9
NLB	21749	2014	1	2	13	31	23	1	509	Ki3xOh7B	DRIL38.065	71	45	55	75	NA	7	36	56.4
NLB	21750	2014	1	2	13	31	22	1	510	Ki3xOh7B	DRIL38.021	71	50	65	85	NA	3	36	65
NLB	21751	2014	1	2	13	31	21	1	511	Ki3xOh7B	DRIL38.117	71	40	65	70	NA	38	30	58.9
NLB	21752	2014	1	2	13	31	20	1	512	Ki3xOh7B	DRIL38.004	71	50	50	90	NA	38	30	58.6
NLB	21753	2014	1	2	13	31	19	1	513	Ki3xOh7B	DRIL38.097	71	55	65	85	NA	3	38	66.4
NLB	21754	2014	1	2	14	31	18	1	514	Ki3xOh7B	DRIL38.157	71	35	60	75	NA	32	25	56.1
NLB	21755	2014	1	2	14	31	17	1	515	Ki3xOh7B	DRIL38.112	71	40	55	75	NA	40	18	55
NLB	21756	2014	1	2	14	31	16	1	516	Ki3xOh7B	DRIL38.222	73	35	65	85	NA	37	35	60.7
NLB	21758	2014	1	2	14	31	14	1	518	Ki3xOh7B	DRIL38.001	71	50	65	85	NA	40	32	65
NLB	21759	2014	1	2	14	31	13	1	519	Ki3xOh7B	DRIL38.143	71	45	60	75	NA	42	27	58.9
NLB	21760	2014	1	2	14	31	12	1	520	Ki3xOh7B	DRIL38.086	70	55	70	90	NA	36	20	70
NLB	21761	2014	1	2	14	31	11	1	521	Ki3xOh7B	DRIL38.094	70	40	60	70	NA	40	28	56.4
NLB	21762	2014	1	2	14	31	10	1	522	Ki3xOh7B	DRIL38.012	71	35	50	70	NA	3	42	50
NLB	21763	2014	1	2	14	31	9	1	523	Ki3xOh7B	DRIL38.210	71	35	45	65	NA	42	31	46.4
NLB	21765	2014	1	2	14	31	7	1	525	Ki3xOh7B	DRIL38.159	75	50	60	85	NA	32	30	62.5
NLB	21766	2014	1	2	14	31	6	1	526	Ki3xOh7B	DRIL38.116	71	50	65	85	NA	5	39	65
NLB	21767	2014	1	2	14	31	5	1	527	Ki3xOh7B	DRIL38.156	74	30	35	55	NA	36	31	37.9
NLB	21768	2014	1	2	14	31	4	1	528	Ki3xOh7B	DRIL38.031	71	45	50	85	NA	3	34	56.1
NLB	21770	2014	1	2	14	31	2	1	530	Ki3xOh7B	DRIL38.228	71	40	60	65	NA	38	25	55.4
NLB	21771	2014	1	2	14	31	1	1	531	Ki3xOh7B	DRIL38.084	73	40	55	65	NA	37	32	52.9
NLB	21772	2014	1	2	14	32	1	1	532	Ki3xOh7B	DRIL38.154	71	50	65	90	NA	40	27	66.1
NLB	17523	2015	1	1	1	8	4	1	1	Ki3xOh7B	DRIL38.038	70	25	40	55	70	42	34	47.5
NLB	17524	2015	1	1	1	8	5	1	2	Ki3xOh7B	DRIL38.054	69	25	40	55	65	38	39	46.7
NLB	17526	2015	1	1	1	8	7	1	4	Ki3xOh7B	DRIL38.160	74	20	35	50	70	44	36	43.3
NLB	17528	2015	1	1	1	8	9	1	6	Ki3xOh7B	DRIL38.018	74	15	35	55	60	3	38	42.7
NLB	17529	2015	1	1	1	8	10	1	7	Ki3xOh7B	DRIL38.023	74	20	35	55	70	34	25	45
NLB	17531	2015	1	1	1	8	12	1	9	Ki3xOh7B	DRIL38.156	74	15	30	45	55	36	27	36.7
NLB	17532	2015	1	1	1	8	13	1	10	Ki3xOh7B	DRIL38.139	73	25	35	45	50	40	25	39.2
NLB	17534	2015	1	1	1	8	15	1	12	Ki3xOh7B	DRIL38.003	71	25	35	50	65	42	27	43.3
NLB	17535	2015	1	1	1	8	16	1	13	Ki3xOh7B	DRIL38.036	73	35	45	60	85	42	38	54.8
NLB	17536	2015	1	1	1	8	17	1	14	Ki3xOh7B	DRIL38.133	75	20	35	50	55	28	27	41
NLB	17537	2015	1	1	1	8	18	1	15	Ki3xOh7B	DRIL38.192	69	15	35	50	75	40	38	43.3
NLB	17538	2015	1	1	1	8	19	1	16	Ki3xOh7B	DRIL38.122	71	25	40	65	80	34	10	52.5
NLB	17539	2015	1	1	1	8	20	1	17	Ki3xOh7B	DRIL38.064	75	25	35	45	65	36	25	41.5
NLB	17540	2015	1	1	1	8	21	1	18	Ki3xOh7B	DRIL38.171	74	25	35	45	55	38	27	40
NLB	17541	2015	1	1	1	8	22	1	19	Ki3xOh7B	DRIL38.035	75	20	25	35	50	36	22	31.5
NLB	17542	2015	1	1	2	8	23	1	20	Ki3xOh7B	DRIL38.128	73	20	35	50	60	34	27	41.7
NLB	17543	2015	1	1	2	8	24	1	21	Ki3xOh7B	DRIL38.159	74	20	30	45	65	40	30	39
NLB	17544	2015	1	1	2	8	25	1	22	Ki3xOh7B	DRIL38.170	76	10	10	20	30	34	25	16.5
NLB	17545	2015	1	1	2	8	26	1	23	Ki3xOh7B	DRIL38.026	76	20	45	55	65	38	30	47.7
NLB	17547	2015	1	1	2	8	28	1	25	Ki3xOh7B	DRIL38.185	72	40	50	60	75	5	34	55.8
NLB	17548	2015	1	1	2	9	28	1	26	Ki3xOh7B	DRIL38.208	70	25	40	55	75	34	22	48.3
NLB	17549	2015	1	1	2	9	27	1	27	Ki3xOh7B	DRIL38.067	74	25	35	45	55	5	38	40
NLB	17550	2015	1	1	2	9	26	1	28	Ki3xOh7B	DRIL38.094	70	15	35	45	55	34	22	38.5
NLB	17551	2015	1	1	2	9	25	1	29	Ki3xOh7B	DRIL38.007	76	15	35	55	60	42	20	42.7
NLB	17552	2015	1	1	2	9	24	1	30	Ki3xOh7B	DRIL38.224	76	25	45	60	70	40	27	51
NLB	17553	2015	1	1	2	9	23	1	31	Ki3xOh7B	DRIL38.198	74	25	35	40	50	36	14	37.5
NLB	17554	2015	1	1	2	9	22	1	32	Ki3xOh7B	DRIL38.172	74	5	35	40	55	40	32	35.2
NLB	17556	2015	1	1	2	9	20	1	34	Ki3xOh7B	DRIL38.034	74	25	40	60	65	3	34	48.5
NLB	17558	2015	1	1	2	9	18	1	36	Ki3xOh7B	DRIL38.178	74	25	30	50	60	40	27	40.8
NLB	17559	2015	1	1	2	9	17	1	37	Ki3xOh7B	DRIL38.114	74	20	35	50	55	3	32	41
NLB	17560	2015	1	1	2	9	16	1	38	Ki3xOh7B	DRIL38.091	74	30	45	65	75	5	39	54.2
NLB	17562	2015	1	1	3	9	14	1	40	Ki3xOh7B	DRIL38.232	65	20	35	45	65	34	25	40.8
NLB	17563	2015	1	1	3	9	13	1	41	Ki3xOh7B	DRIL38.197	71	20	30	45	90	42	25	42.9
NLB	17564	2015	1	1	3	9	12	1	42	Ki3xOh7B	DRIL38.211	68	20	35	45	70	36	32	41.5
NLB	17565	2015	1	1	3	9	11	1	43	Ki3xOh7B	DRIL38.075	71	20	40	55	70	38	34	46.7
NLB	17566	2015	1	1	3	9	10	1	44	Ki3xOh7B	DRIL38.225	76	20	40	40	55	32	18	39.2
NLB	17567	2015	1	1	3	9	9	1	45	Ki3xOh7B	DRIL38.084	74	15	30	40	55	46	25	35
NLB	17568	2015	1	1	3	9	8	1	46	Ki3xOh7B	DRIL38.218	74	15	20	35	55	34	27	29.8
NLB	17569	2015	1	1	3	9	7	1	47	Ki3xOh7B	DRIL38.154	68	35	50	75	90	40	25	62.5
NLB	17572	2015	1	1	3	9	4	1	50	Ki3xOh7B	DRIL38.066	66	30	40	45	70	36	32	44.8
NLB	17573	2015	1	1	3	9	3	1	51	Ki3xOh7B	DRIL38.089	NA	NA	NA	NA	NA	NA	NA	NA
NLB	17575	2015	1	1	3	9	1	1	53	Ki3xOh7B	DRIL38.148	75	35	45	65	70	42	30	54.2
NLB	17576	2015	1	1	3	10	1	1	54	Ki3xOh7B	DRIL38.048	75	35	45	50	55	38	25	46.7
NLB	17577	2015	1	1	3	10	2	1	55	Ki3xOh7B	DRIL38.040	70	35	40	55	70	38	27	49
NLB	17578	2015	1	1	3	10	3	1	56	Ki3xOh7B	DRIL38.169	73	20	35	45	55	44	36	39.2
NLB	17579	2015	1	1	3	10	4	1	57	Ki3xOh7B	DRIL38.020	72	15	25	35	55	42	36	31.5
NLB	17580	2015	1	1	4	10	5	1	58	Ki3xOh7B	DRIL38.180	75	35	40	60	80	40	32	52.3
NLB	17581	2015	1	1	4	10	6	1	59	Ki3xOh7B	DRIL38.076	75	30	40	65	85	42	36	54
NLB	17582	2015	1	1	4	10	7	1	60	Ki3xOh7B	DRIL38.046	75	30	40	65	85	42	39	54
NLB	17584	2015	1	1	4	10	9	1	62	Ki3xOh7B	DRIL38.017	74	20	25	45	55	34	32	35.8
NLB	17585	2015	1	1	4	10	10	1	63	Ki3xOh7B	DRIL38.203	75	15	30	45	65	42	27	38.3
NLB	17586	2015	1	1	4	10	11	1	64	Ki3xOh7B	DRIL38.195	75	15	35	40	65	36	22	38.3
NLB	17588	2015	1	1	4	10	13	1	66	Ki3xOh7B	DRIL38.123	72	25	30	50	65	44	30	41.5
NLB	17589	2015	1	1	4	10	14	1	67	Ki3xOh7B	DRIL38.086	76	25	35	55	80	38	25	47.3
NLB	17591	2015	1	1	4	10	16	1	69	Ki3xOh7B	DRIL38.004	76	30	50	60	85	5	38	55.8
NLB	17592	2015	1	1	4	10	17	1	70	Ki3xOh7B	DRIL38.078	76	30	40	50	75	32	20	47.3
NLB	17593	2015	1	1	4	10	18	1	71	Ki3xOh7B	DRIL38.162	76	25	30	40	65	34	32	38.1
NLB	17594	2015	1	1	4	10	19	1	72	Ki3xOh7B	DRIL38.112	76	20	25	45	55	34	30	35.8
NLB	17595	2015	1	1	4	10	20	1	73	Ki3xOh7B	DRIL38.079	72	25	35	50	65	40	27	43.3
NLB	17596	2015	1	1	4	10	21	1	74	Ki3xOh7B	DRIL38.106	72	30	45	60	85	34	30	54
NLB	17598	2015	1	1	4	10	23	1	76	Ki3xOh7B	DRIL38.175	76	20	30	35	50	32	20	33.3
NLB	17601	2015	1	1	5	10	26	1	79	Ki3xOh7B	DRIL38.057	76	20	35	45	70	38	20	41.5
NLB	17602	2015	1	1	5	10	27	1	80	Ki3xOh7B	DRIL38.088	73	20	35	65	85	36	22	50.8
NLB	17603	2015	1	1	5	10	28	1	81	Ki3xOh7B	DRIL38.056	72	25	40	65	85	42	32	53.3
NLB	17604	2015	1	1	5	11	28	1	82	Ki3xOh7B	DRIL38.209	73	30	35	50	65	3	32	44
NLB	17605	2015	1	1	5	11	27	1	83	Ki3xOh7B	DRIL38.191	75	20	20	40	55	32	32	32.3
NLB	17606	2015	1	1	5	11	26	1	84	Ki3xOh7B	DRIL38.108	75	15	25	35	55	38	32	31.5
NLB	17607	2015	1	1	5	11	25	1	85	Ki3xOh7B	DRIL38.110	75	20	30	55	70	40	25	43.3
NLB	17608	2015	1	1	5	11	24	1	86	Ki3xOh7B	DRIL38.101	75	15	25	35	55	40	30	31.5
NLB	17610	2015	1	1	5	11	22	1	88	Ki3xOh7B	DRIL38.016	75	15	30	40	55	38	27	35
NLB	17613	2015	1	1	5	11	19	1	91	Ki3xOh7B	DRIL38.194	75	30	40	45	60	38	32	43.3
NLB	17614	2015	1	1	5	11	18	1	92	Ki3xOh7B	DRIL38.073	72	35	45	55	60	3	36	49.2
NLB	17615	2015	1	1	5	11	17	1	93	Ki3xOh7B	DRIL38.043	73	25	25	40	55	36	27	34.8
NLB	17616	2015	1	1	5	11	16	1	94	Ki3xOh7B	DRIL38.119	73	30	35	50	65	34	22	44
NLB	17618	2015	1	1	6	11	14	1	96	Ki3xOh7B	DRIL38.184	75	30	35	45	65	36	16	42.3
NLB	17619	2015	1	1	6	11	13	1	97	Ki3xOh7B	DRIL38.207	75	30	40	65	80	42	38	53.3
NLB	17620	2015	1	1	6	11	12	1	98	Ki3xOh7B	DRIL38.031	75	30	45	60	80	42	36	53.3
NLB	17621	2015	1	1	6	11	11	1	99	Ki3xOh7B	DRIL38.229	69	30	45	70	95	34	30	59
NLB	17622	2015	1	1	6	11	10	1	100	Ki3xOh7B	DRIL38.140	75	35	40	60	85	40	32	53.1
NLB	17623	2015	1	1	6	11	9	1	101	Ki3xOh7B	DRIL38.126	75	30	40	60	75	42	38	50.8
NLB	17625	2015	1	1	6	11	7	1	103	Ki3xOh7B	DRIL38.030	72	30	35	55	75	40	30	47.3
NLB	17626	2015	1	1	6	11	6	1	104	Ki3xOh7B	DRIL38.179	76	30	35	45	70	40	22	43.1
NLB	17627	2015	1	1	6	11	5	1	105	Ki3xOh7B	DRIL38.150	67	35	45	50	80	42	32	50.6
NLB	17628	2015	1	1	6	11	4	1	106	Ki3xOh7B	DRIL38.009	72	25	35	50	60	40	36	42.5
NLB	17629	2015	1	1	6	11	3	1	107	Ki3xOh7B	DRIL38.137	75	25	35	55	70	36	22	45.8
NLB	17630	2015	1	1	6	11	2	1	108	Ki3xOh7B	DRIL38.130	72	25	35	50	60	34	25	42.5
NLB	17631	2015	1	1	6	11	1	1	109	Ki3xOh7B	DRIL38.011	74	30	35	50	65	38	38	44
NLB	17632	2015	1	1	6	12	1	1	110	Ki3xOh7B	DRIL38.062	74	15	25	45	65	40	32	36.5
NLB	17633	2015	1	1	6	12	2	1	111	Ki3xOh7B	DRIL38.107	70	30	35	45	65	42	32	42.3
NLB	17635	2015	1	1	6	12	4	1	113	Ki3xOh7B	DRIL38.025	67	25	35	55	85	32	27	48.1
NLB	17636	2015	1	1	6	12	5	1	114	Ki3xOh7B	DRIL38.183	68	30	40	60	90	42	27	53.1
NLB	17637	2015	1	1	7	12	6	1	115	Ki3xOh7B	DRIL38.230	71	5	10	45	80	30	16	32.1
NLB	17638	2015	1	1	7	12	7	1	116	Ki3xOh7B	DRIL38.027	72	20	35	50	65	3	45	42.5
NLB	17640	2015	1	1	7	12	9	1	118	Ki3xOh7B	DRIL38.226	67	35	40	50	80	5	36	48.8
NLB	17642	2015	1	1	7	12	11	1	120	Ki3xOh7B	DRIL38.095	76	30	40	60	75	40	32	50.8
NLB	17643	2015	1	1	7	12	12	1	121	Ki3xOh7B	DRIL38.231	67	20	20	35	70	3	39	32.9
NLB	17645	2015	1	1	7	12	14	1	123	Ki3xOh7B	DRIL38.134	75	25	40	55	85	32	14	49.8
NLB	17646	2015	1	1	7	12	15	1	124	Ki3xOh7B	DRIL38.041	71	30	35	55	80	38	22	48.1
NLB	17648	2015	1	1	7	12	17	1	126	Ki3xOh7B	DRIL38.015	71	30	40	55	75	38	25	49
NLB	17649	2015	1	1	7	12	18	1	127	Ki3xOh7B	DRIL38.001	75	20	35	50	70	38	25	43.3
NLB	17651	2015	1	1	7	12	20	1	129	Ki3xOh7B	DRIL38.093	71	30	35	55	75	40	30	47.3
NLB	17652	2015	1	1	7	12	21	1	130	Ki3xOh7B	DRIL38.055	75	15	35	50	60	40	32	41
NLB	17653	2015	1	1	7	12	22	1	131	Ki3xOh7B	DRIL38.196	75	15	30	40	55	34	22	35
NLB	17654	2015	1	1	7	12	23	1	132	Ki3xOh7B	DRIL38.096	75	15	25	50	60	42	27	37.5
NLB	17655	2015	1	1	7	12	24	1	133	Ki3xOh7B	DRIL38.141	75	20	30	50	75	40	36	42.3
NLB	17656	2015	1	1	8	12	25	1	134	Ki3xOh7B	DRIL38.222	75	15	30	45	65	34	22	38.3
NLB	17659	2015	1	1	8	12	28	1	137	Ki3xOh7B	DRIL38.061	75	25	40	60	85	34	22	51.5
NLB	17660	2015	1	1	8	13	28	1	138	Ki3xOh7B	DRIL38.008	75	15	25	45	60	36	22	35.8
NLB	17661	2015	1	1	8	13	27	1	139	Ki3xOh7B	DRIL38.059	76	10	25	45	60	36	14	35
NLB	17662	2015	1	1	8	13	26	1	140	Ki3xOh7B	DRIL38.037	76	10	15	45	65	34	27	32.3
NLB	17664	2015	1	1	8	13	24	1	142	Ki3xOh7B	DRIL38.223	76	10	25	35	45	22	20	29.2
NLB	17666	2015	1	1	8	13	22	1	144	Ki3xOh7B	DRIL38.151	73	25	35	40	65	42	22	39.8
NLB	17667	2015	1	1	8	13	21	1	145	Ki3xOh7B	DRIL38.210	71	15	25	40	60	34	20	34
NLB	17668	2015	1	1	8	13	20	1	146	Ki3xOh7B	DRIL38.077	72	15	35	45	65	38	27	40
NLB	17669	2015	1	1	8	13	19	1	147	Ki3xOh7B	DRIL38.014	71	25	40	60	75	40	34	50
NLB	17670	2015	1	1	8	13	18	1	148	Ki3xOh7B	DRIL38.058	71	25	40	60	75	40	30	50
NLB	17671	2015	1	1	8	13	17	1	149	Ki3xOh7B	DRIL38.022	75	20	35	50	65	28	25	42.5
NLB	17672	2015	1	1	8	13	16	1	150	Ki3xOh7B	DRIL38.157	75	20	35	45	65	30	20	40.8
NLB	17673	2015	1	1	8	13	15	1	151	Ki3xOh7B	DRIL38.115	75	25	35	55	75	34	25	46.5
NLB	17674	2015	1	1	8	13	14	1	152	Ki3xOh7B	DRIL38.219	73	5	10	20	40	36	22	17.3
NLB	17675	2015	1	1	9	13	13	1	153	Ki3xOh7B	DRIL38.138	74	25	35	55	70	42	32	45.8
NLB	17676	2015	1	1	9	13	12	1	154	Ki3xOh7B	DRIL38.129	75	20	30	40	60	40	25	36.5
NLB	17677	2015	1	1	9	13	11	1	155	Ki3xOh7B	DRIL38.144	73	20	30	50	65	38	27	40.8
NLB	17679	2015	1	1	9	13	9	1	157	Ki3xOh7B	DRIL38.082	75	20	35	45	60	40	20	40
NLB	17681	2015	1	1	9	13	7	1	159	Ki3xOh7B	DRIL38.125	64	25	40	55	90	40	22	50.6
NLB	17682	2015	1	1	9	13	6	1	160	Ki3xOh7B	DRIL38.177	75	20	20	20	35	40	16	22.3
NLB	17683	2015	1	1	9	13	5	1	161	Ki3xOh7B	DRIL38.060	71	25	35	55	65	44	38	45
NLB	17687	2015	1	1	9	13	1	1	165	Ki3xOh7B	DRIL38.187	71	15	30	45	65	38	34	38.3
NLB	17688	2015	1	1	9	14	1	1	166	Ki3xOh7B	DRIL38.118	75	15	30	50	70	36	20	40.8
NLB	17689	2015	1	1	9	14	2	1	167	Ki3xOh7B	DRIL38.103	73	20	35	50	70	42	32	43.3
NLB	17690	2015	1	1	9	14	3	1	168	Ki3xOh7B	DRIL38.190	75	15	30	45	55	3	30	36.7
NLB	17691	2015	1	1	9	14	4	1	169	Ki3xOh7B	DRIL38.201	68	20	35	35	55	9	36	35.8
NLB	17692	2015	1	1	9	14	5	1	170	Ki3xOh7B	DRIL38.028	66	30	40	55	75	44	32	49
NLB	17693	2015	1	1	9	14	6	1	171	Ki3xOh7B	DRIL38.074	75	20	40	50	70	42	36	45
NLB	17694	2015	1	1	10	14	7	1	172	Ki3xOh7B	DRIL38.085	75	20	40	50	70	3	38	45
NLB	17695	2015	1	1	10	14	8	1	173	Ki3xOh7B	DRIL38.012	66	15	35	55	80	34	30	45.8
NLB	17697	2015	1	1	10	14	10	1	175	Ki3xOh7B	DRIL38.145	71	20	40	60	80	40	30	50
NLB	17699	2015	1	1	10	14	12	1	177	Ki3xOh7B	DRIL38.050	73	25	40	60	85	44	36	51.5
NLB	17701	2015	1	1	10	14	14	1	179	Ki3xOh7B	DRIL38.029	75	20	40	60	75	42	25	49.2
NLB	17702	2015	1	1	10	14	15	1	180	Ki3xOh7B	DRIL38.217	72	15	20	50	65	34	20	36.5
NLB	17703	2015	1	1	10	14	16	1	181	Ki3xOh7B	DRIL38.052	75	30	40	65	90	40	22	54.8
NLB	17704	2015	1	1	10	14	17	1	182	Ki3xOh7B	DRIL38.142	75	25	35	50	80	44	32	45.6
NLB	17706	2015	1	1	10	14	19	1	184	Ki3xOh7B	DRIL38.117	76	10	20	35	55	34	25	29
NLB	17709	2015	1	1	10	14	22	1	187	Ki3xOh7B	DRIL38.216	65	20	35	45	60	32	20	40
NLB	17710	2015	1	1	10	14	23	1	188	Ki3xOh7B	DRIL38.105	73	25	40	65	85	32	25	53.3
NLB	17711	2015	1	1	10	14	24	1	189	Ki3xOh7B	DRIL38.228	75	20	35	50	70	30	18	43.3
NLB	17712	2015	1	1	10	14	25	1	190	Ki3xOh7B	DRIL38.166	75	25	40	55	75	40	36	48.3
NLB	17713	2015	1	1	11	14	26	1	191	Ki3xOh7B	DRIL38.044	75	30	40	60	85	40	32	52.3
NLB	17714	2015	1	1	11	14	27	1	192	Ki3xOh7B	DRIL38.153	75	15	30	50	70	34	16	40.8
NLB	17715	2015	1	1	11	14	28	1	193	Ki3xOh7B	DRIL38.189	75	20	40	60	85	34	22	50.8
NLB	17718	2015	1	1	11	15	26	1	196	Ki3xOh7B	DRIL38.214	75	10	25	35	60	38	22	31.5
NLB	17719	2015	1	1	11	15	25	1	197	Ki3xOh7B	DRIL38.033	74	30	40	60	85	30	12	52.3
NLB	17720	2015	1	1	11	15	24	1	198	Ki3xOh7B	DRIL38.019	74	30	35	40	75	40	27	42.1
NLB	17721	2015	1	1	11	15	23	1	199	Ki3xOh7B	DRIL38.045	75	20	35	40	65	34	16	39
NLB	17722	2015	1	1	11	15	22	1	200	Ki3xOh7B	DRIL38.143	73	15	35	45	65	36	30	40
NLB	17723	2015	1	1	11	15	21	1	201	Ki3xOh7B	DRIL38.071	75	20	30	50	70	38	18	41.5
NLB	17724	2015	1	1	11	15	20	1	202	Ki3xOh7B	DRIL38.083	73	15	20	35	60	36	20	30.6
NLB	17726	2015	1	1	11	15	18	1	204	Ki3xOh7B	DRIL38.158	72	20	25	35	55	28	20	32.3
NLB	17727	2015	1	1	11	15	17	1	205	Ki3xOh7B	DRIL38.047	71	30	35	50	70	40	16	44.8
NLB	17729	2015	1	1	11	15	15	1	207	Ki3xOh7B	DRIL38.132	75	30	35	50	65	40	30	44
NLB	17730	2015	1	1	11	15	14	1	208	Ki3xOh7B	DRIL38.116	75	35	40	55	80	42	36	50.6
NLB	17731	2015	1	1	11	15	13	1	209	Ki3xOh7B	DRIL38.113	72	20	35	50	65	40	20	42.5
NLB	17732	2015	1	1	12	15	12	1	210	Ki3xOh7B	DRIL38.146	75	25	35	50	60	42	30	42.5
NLB	17733	2015	1	1	12	15	11	1	211	Ki3xOh7B	DRIL38.097	71	30	45	60	75	40	36	52.5
NLB	17734	2015	1	1	12	15	10	1	212	Ki3xOh7B	DRIL38.010	75	25	35	55	75	42	27	46.5
NLB	17736	2015	1	1	12	15	8	1	214	Ki3xOh7B	DRIL38.072	71	30	45	55	80	40	34	51.5
NLB	17737	2015	1	1	12	15	7	1	215	Ki3xOh7B	DRIL38.127	73	25	40	55	75	38	38	48.3
NLB	17738	2015	1	1	12	15	6	1	216	Ki3xOh7B	DRIL38.163	75	30	45	60	80	38	30	53.3
NLB	17740	2015	1	1	12	15	4	1	218	Ki3xOh7B	DRIL38.120	72	35	45	60	65	36	27	51.7
NLB	17741	2015	1	1	12	15	3	1	219	Ki3xOh7B	DRIL38.080	72	10	25	35	60	40	34	31.5
NLB	17742	2015	1	1	12	15	2	1	220	Ki3xOh7B	DRIL38.070	71	15	35	45	65	38	32	40
NLB	17743	2015	1	1	12	15	1	1	221	Ki3xOh7B	DRIL38.081	70	30	40	45	65	38	30	44
NLB	17744	2015	1	1	12	16	1	1	222	Ki3xOh7B	DRIL38.090	75	25	40	50	70	42	30	45.8
NLB	17746	2015	1	1	12	16	3	1	224	Ki3xOh7B	DRIL38.155	75	30	35	55	85	36	27	48.8
NLB	17747	2015	1	1	12	16	4	1	225	Ki3xOh7B	DRIL38.220	73	10	25	30	50	38	27	28.3
NLB	17748	2015	1	1	12	16	5	1	226	Ki3xOh7B	DRIL38.221	72	25	35	60	90	26	10	50.6
NLB	17750	2015	1	1	12	16	7	1	228	Ki3xOh7B	DRIL38.206	71	15	35	50	60	38	38	41
NLB	17751	2015	1	1	13	16	8	1	229	Ki3xOh7B	DRIL38.202	73	10	30	35	55	34	30	32.5
NLB	17752	2015	1	1	13	16	9	1	230	Ki3xOh7B	DRIL38.186	70	20	35	40	65	36	27	39
NLB	17756	2015	1	1	13	16	13	1	234	Ki3xOh7B	DRIL38.147	75	15	35	55	70	38	25	44.2
NLB	17758	2015	1	1	13	16	15	1	236	Ki3xOh7B	DRIL38.152	75	30	35	55	70	38	20	46.5
NLB	17759	2015	1	1	13	16	16	1	237	Ki3xOh7B	DRIL38.227	72	35	40	55	75	40	30	49.8
NLB	17760	2015	1	1	13	16	17	1	238	Ki3xOh7B	DRIL38.168	63	35	35	50	75	24	16	46.3
NLB	17761	2015	1	1	13	16	18	1	239	Ki3xOh7B	DRIL38.111	75	25	35	55	80	38	36	47.3
NLB	17762	2015	1	1	13	16	19	1	240	Ki3xOh7B	DRIL38.021	72	25	35	55	80	3	36	47.3
NLB	17764	2015	1	1	13	16	21	1	242	Ki3xOh7B	DRIL38.065	72	30	35	60	75	44	34	49
NLB	17765	2015	1	1	13	16	22	1	243	Ki3xOh7B	DRIL38.188	69	20	35	55	70	22	18	45
NLB	17766	2015	1	1	13	16	23	1	244	Ki3xOh7B	DRIL38.069	75	20	40	55	70	34	18	46.7
NLB	17767	2015	1	1	13	16	24	1	245	Ki3xOh7B	DRIL38.109	75	25	40	60	85	38	27	51.5
NLB	17768	2015	1	1	13	16	25	1	246	Ki3xOh7B	DRIL38.049	73	30	40	55	75	42	30	49
NLB	17769	2015	1	1	13	16	26	1	247	Ki3xOh7B	DRIL38.051	73	15	20	50	65	40	32	36.5
NLB	17770	2015	1	1	14	16	27	1	248	Ki3xOh7B	DRIL38.063	75	10	20	50	65	38	22	35.8
NLB	17772	2015	1	1	14	17	28	1	250	Ki3xOh7B	DRIL38.032	73	10	25	45	65	3	32	35.8
NLB	17773	2015	1	1	14	17	27	1	251	Ki3xOh7B	DRIL38.006	73	15	30	55	70	30	12	42.5
NLB	17774	2015	1	1	14	17	26	1	252	Ki3xOh7B	DRIL38.149	72	25	40	65	85	38	25	53.3
NLB	17776	2015	1	1	14	17	24	1	254	Ki3xOh7B	DRIL38.104	73	25	40	55	70	42	32	47.5
NLB	17777	2015	1	1	14	17	23	1	255	Ki3xOh7B	DRIL38.176	75	10	15	25	55	30	16	23.8
NLB	17778	2015	1	1	14	17	22	1	256	Ki3xOh7B	DRIL38.131	NA	NA	NA	NA	NA	NA	NA	NA
NLB	17780	2015	1	1	14	17	20	1	258	Ki3xOh7B	DRIL38.167	75	25	35	45	70	40	30	42.3
NLB	17781	2015	1	1	14	17	19	1	259	Ki3xOh7B	DRIL38.193	75	35	60	70	85	40	25	63.5
NLB	17782	2015	1	1	14	17	18	1	260	Ki3xOh7B	DRIL38.136	72	25	25	45	85	3	34	41.2
NLB	17783	2015	1	1	14	17	17	1	261	Ki3xOh7B	DRIL38.199	65	30	30	50	90	38	22	46.2
NLB	17784	2015	1	1	14	17	16	1	262	Ki3xOh7B	DRIL38.068	74	30	40	50	70	40	22	46.5
NLB	17785	2015	1	1	14	17	15	1	263	Ki3xOh7B	DRIL38.024	75	15	20	45	70	28	20	35.6
NLB	17786	2015	1	1	14	17	14	1	264	Ki3xOh7B	DRIL38.205	75	10	25	45	70	34	30	36.5
NLB	17787	2015	1	1	14	17	13	1	265	Ki3xOh7B	DRIL38.181	70	20	35	45	55	38	18	39.2
NLB	17788	2015	1	1	14	17	12	1	266	Ki3xOh7B	DRIL38.053	72	25	30	45	65	5	41	39.8
NLB	20511	2015	1	2	1	34	5	1	268	Ki3xOh7B	DRIL38.214	NA	NA	NA	NA	NA	NA	NA	NA
NLB	20512	2015	1	2	1	34	6	1	269	Ki3xOh7B	DRIL38.128	NA	NA	NA	NA	NA	NA	NA	NA
NLB	20513	2015	1	2	1	34	7	1	270	Ki3xOh7B	DRIL38.167	76	10	20	30	45	24	18	25.8
NLB	20514	2015	1	2	1	34	8	1	271	Ki3xOh7B	DRIL38.140	76	10	25	55	65	32	14	39.2
NLB	20517	2015	1	2	1	34	11	1	274	Ki3xOh7B	DRIL38.080	75	10	25	35	50	40	25	30
NLB	20520	2015	1	2	1	34	14	1	277	Ki3xOh7B	DRIL38.133	NA	NA	NA	NA	NA	NA	NA	NA
NLB	20521	2015	1	2	1	34	15	1	278	Ki3xOh7B	DRIL38.203	75	5	15	45	55	30	16	30
NLB	20523	2015	1	2	1	34	17	1	280	Ki3xOh7B	DRIL38.084	NA	5	10	35	50	24	10	24
NLB	20526	2015	1	2	1	34	20	1	283	Ki3xOh7B	DRIL38.206	NA	NA	NA	NA	NA	NA	NA	NA
NLB	20528	2015	1	2	1	34	22	1	285	Ki3xOh7B	DRIL38.184	76	15	25	45	55	30	10	35
NLB	20529	2015	1	2	2	34	23	1	286	Ki3xOh7B	DRIL38.027	NA	NA	NA	NA	NA	NA	NA	NA
NLB	20530	2015	1	2	2	34	24	1	287	Ki3xOh7B	DRIL38.056	72	20	35	55	85	42	30	47.3
NLB	20531	2015	1	2	2	34	25	1	288	Ki3xOh7B	DRIL38.172	76	5	15	40	65	30	20	29.8
NLB	20532	2015	1	2	2	34	26	1	289	Ki3xOh7B	DRIL38.189	76	10	35	55	80	38	18	45
NLB	20534	2015	1	2	2	34	28	1	291	Ki3xOh7B	DRIL38.152	72	10	25	50	75	38	20	39
NLB	20535	2015	1	2	2	35	28	1	292	Ki3xOh7B	DRIL38.117	73	10	15	40	60	28	27	29.8
NLB	20536	2015	1	2	2	35	27	1	293	Ki3xOh7B	DRIL38.107	75	10	25	50	65	36	27	37.5
NLB	20537	2015	1	2	2	35	26	1	294	Ki3xOh7B	DRIL38.123	73	10	20	35	65	34	14	30.6
NLB	20538	2015	1	2	2	35	25	1	295	Ki3xOh7B	DRIL38.036	NA	NA	NA	NA	NA	NA	NA	NA
NLB	20539	2015	1	2	2	35	24	1	296	Ki3xOh7B	DRIL38.053	NA	NA	NA	NA	NA	NA	NA	NA
NLB	20540	2015	1	2	2	35	23	1	297	Ki3xOh7B	DRIL38.070	75	10	25	50	65	32	18	37.5
NLB	20541	2015	1	2	2	35	22	1	298	Ki3xOh7B	DRIL38.014	NA	NA	NA	NA	NA	NA	NA	NA
NLB	20542	2015	1	2	2	35	21	1	299	Ki3xOh7B	DRIL38.054	75	10	25	45	65	26	20	35.8
NLB	20543	2015	1	2	2	35	20	1	300	Ki3xOh7B	DRIL38.082	76	10	25	45	60	28	12	35
NLB	20545	2015	1	2	2	35	18	1	302	Ki3xOh7B	DRIL38.118	76	10	30	55	75	22	6	42.5
NLB	20546	2015	1	2	2	35	17	1	303	Ki3xOh7B	DRIL38.232	69	10	20	45	65	24	14	34
NLB	20547	2015	1	2	2	35	16	1	304	Ki3xOh7B	DRIL38.227	75	15	25	55	65	28	14	40
NLB	20548	2015	1	2	3	35	15	1	305	Ki3xOh7B	DRIL38.218	76	10	20	45	65	22	2	34
NLB	20549	2015	1	2	3	35	14	1	306	Ki3xOh7B	DRIL38.209	74	5	20	45	75	38	14	34.8
NLB	20550	2015	1	2	3	35	13	1	307	Ki3xOh7B	DRIL38.187	72	10	15	30	50	26	16	24.8
NLB	20551	2015	1	2	3	35	12	1	308	Ki3xOh7B	DRIL38.083	76	10	10	20	35	30	18	17.3
NLB	20553	2015	1	2	3	35	10	1	310	Ki3xOh7B	DRIL38.059	NA	NA	NA	NA	NA	NA	NA	NA
NLB	20554	2015	1	2	3	35	9	1	311	Ki3xOh7B	DRIL38.094	66	10	15	40	65	28	14	30.6
NLB	20555	2015	1	2	3	35	8	1	312	Ki3xOh7B	DRIL38.093	75	10	20	40	55	36	22	30.8
NLB	20556	2015	1	2	3	35	7	1	313	Ki3xOh7B	DRIL38.136	76	10	20	55	75	36	25	39
NLB	20557	2015	1	2	3	35	6	1	314	Ki3xOh7B	DRIL38.202	75	5	10	35	45	28	20	23.3
NLB	20558	2015	1	2	3	35	5	1	315	Ki3xOh7B	DRIL38.163	75	15	25	35	60	38	22	32.3
NLB	20559	2015	1	2	3	35	4	1	316	Ki3xOh7B	DRIL38.199	69	10	15	40	60	24	4	29.8
NLB	20560	2015	1	2	3	35	3	1	317	Ki3xOh7B	DRIL38.064	76	15	25	45	70	34	18	37.3
NLB	20563	2015	1	2	3	36	1	1	320	Ki3xOh7B	DRIL38.105	NA	NA	NA	NA	NA	NA	NA	NA
NLB	20564	2015	1	2	3	36	2	1	321	Ki3xOh7B	DRIL38.019	NA	NA	NA	NA	NA	NA	NA	NA
NLB	20565	2015	1	2	3	36	3	1	322	Ki3xOh7B	DRIL38.062	NA	NA	NA	NA	NA	NA	NA	NA
NLB	20566	2015	1	2	3	36	4	1	323	Ki3xOh7B	DRIL38.008	76	10	30	55	70	22	8	41.7
NLB	20567	2015	1	2	4	36	5	1	324	Ki3xOh7B	DRIL38.192	76	10	20	50	80	30	16	38.1
NLB	20568	2015	1	2	4	36	6	1	325	Ki3xOh7B	DRIL38.211	76	20	30	60	85	30	12	47.3
NLB	20569	2015	1	2	4	36	7	1	326	Ki3xOh7B	DRIL38.037	75	15	25	50	70	28	18	39
NLB	20570	2015	1	2	4	36	8	1	327	Ki3xOh7B	DRIL38.198	75	15	25	45	50	28	8	34.2
NLB	20571	2015	1	2	4	36	9	1	328	Ki3xOh7B	DRIL38.178	75	5	25	45	75	26	8	36.5
NLB	20573	2015	1	2	4	36	11	1	330	Ki3xOh7B	DRIL38.153	70	10	30	55	75	32	18	42.5
NLB	20574	2015	1	2	4	36	12	1	331	Ki3xOh7B	DRIL38.151	75	10	25	50	75	24	8	39
NLB	20575	2015	1	2	4	36	13	1	332	Ki3xOh7B	DRIL38.131	NA	NA	NA	NA	NA	NA	NA	NA
NLB	20577	2015	1	2	4	36	15	1	334	Ki3xOh7B	DRIL38.110	NA	5	20	45	75	34	14	34.8
NLB	20578	2015	1	2	4	36	16	1	335	Ki3xOh7B	DRIL38.130	NA	NA	NA	NA	NA	NA	NA	NA
NLB	20579	2015	1	2	4	36	17	1	336	Ki3xOh7B	DRIL38.127	NA	NA	NA	NA	NA	NA	NA	NA
NLB	20581	2015	1	2	4	36	19	1	338	Ki3xOh7B	DRIL38.148	75	20	40	55	75	38	18	47.5
NLB	20582	2015	1	2	4	36	20	1	339	Ki3xOh7B	DRIL38.186	69	20	25	45	70	34	18	38.1
NLB	20583	2015	1	2	4	36	21	1	340	Ki3xOh7B	DRIL38.129	75	10	20	40	55	38	25	30.8
NLB	20585	2015	1	2	4	36	23	1	342	Ki3xOh7B	DRIL38.231	NA	NA	NA	NA	NA	NA	NA	NA
NLB	20586	2015	1	2	5	36	24	1	343	Ki3xOh7B	DRIL38.177	NA	NA	NA	NA	NA	NA	NA	NA
NLB	20587	2015	1	2	5	36	25	1	344	Ki3xOh7B	DRIL38.195	72	10	20	35	50	30	16	28.3
NLB	20588	2015	1	2	5	36	26	1	345	Ki3xOh7B	DRIL38.091	75	10	25	45	70	34	22	36.5
NLB	20589	2015	1	2	5	36	27	1	346	Ki3xOh7B	DRIL38.170	75	10	15	35	40	36	20	25
NLB	20590	2015	1	2	5	36	28	1	347	Ki3xOh7B	DRIL38.132	72	10	30	55	70	40	25	41.7
NLB	20591	2015	1	2	5	37	28	1	348	Ki3xOh7B	DRIL38.205	75	10	25	40	65	30	25	34
NLB	20592	2015	1	2	5	37	27	1	349	Ki3xOh7B	DRIL38.025	72	15	25	40	55	36	18	33.3
NLB	20593	2015	1	2	5	37	26	1	350	Ki3xOh7B	DRIL38.229	71	15	30	45	70	30	18	39
NLB	20594	2015	1	2	5	37	25	1	351	Ki3xOh7B	DRIL38.210	72	5	15	35	55	32	16	26.5
NLB	20596	2015	1	2	5	37	23	1	353	Ki3xOh7B	DRIL38.190	76	10	15	40	50	18	8	28.3
NLB	20599	2015	1	2	5	37	20	1	356	Ki3xOh7B	DRIL38.230	75	5	10	25	50	28	8	20.6
NLB	20600	2015	1	2	5	37	19	1	357	Ki3xOh7B	DRIL38.018	75	10	30	45	65	36	22	37.5
NLB	20601	2015	1	2	5	37	18	1	358	Ki3xOh7B	DRIL38.066	72	20	35	50	65	34	25	42.5
NLB	20603	2015	1	2	5	37	16	1	360	Ki3xOh7B	DRIL38.221	NA	NA	NA	NA	NA	NA	NA	NA
NLB	20604	2015	1	2	5	37	15	1	361	Ki3xOh7B	DRIL38.108	75	10	25	50	70	34	14	38.3
NLB	20605	2015	1	2	6	37	14	1	362	Ki3xOh7B	DRIL38.049	75	10	25	55	80	28	18	41.5
NLB	20606	2015	1	2	6	37	13	1	363	Ki3xOh7B	DRIL38.196	77	10	25	40	65	34	16	34
NLB	20608	2015	1	2	6	37	11	1	365	Ki3xOh7B	DRIL38.079	72	10	30	40	65	34	16	35.8
NLB	20609	2015	1	2	6	37	10	1	366	Ki3xOh7B	DRIL38.038	72	20	35	50	80	36	25	44.8
NLB	20612	2015	1	2	6	37	7	1	369	Ki3xOh7B	DRIL38.068	NA	5	20	50	60	30	12	34.2
NLB	20613	2015	1	2	6	37	6	1	370	Ki3xOh7B	DRIL38.166	75	10	25	55	80	34	14	41.5
NLB	20615	2015	1	2	6	37	4	1	372	Ki3xOh7B	DRIL38.007	75	10	25	55	70	34	10	40
NLB	20616	2015	1	2	6	37	3	1	373	Ki3xOh7B	DRIL38.193	75	20	35	NA	NA	1	61	NA
NLB	20617	2015	1	2	6	37	2	1	374	Ki3xOh7B	DRIL38.169	NA	NA	NA	NA	NA	NA	NA	NA
NLB	20618	2015	1	2	6	37	1	1	375	Ki3xOh7B	DRIL38.137	72	5	20	50	75	28	16	36.5
NLB	20619	2015	1	2	6	38	1	1	376	Ki3xOh7B	DRIL38.090	75	10	25	50	70	38	25	38.3
NLB	20620	2015	1	2	6	38	2	1	377	Ki3xOh7B	DRIL38.217	75	10	25	50	65	30	18	37.5
NLB	20622	2015	1	2	6	38	4	1	379	Ki3xOh7B	DRIL38.058	75	10	20	45	70	28	20	34.8
NLB	20623	2015	1	2	6	38	5	1	380	Ki3xOh7B	DRIL38.078	NA	NA	NA	NA	NA	NA	NA	NA
NLB	20624	2015	1	2	7	38	6	1	381	Ki3xOh7B	DRIL38.024	NA	NA	NA	NA	NA	NA	NA	NA
NLB	20625	2015	1	2	7	38	7	1	382	Ki3xOh7B	DRIL38.044	NA	NA	NA	NA	NA	NA	NA	NA
NLB	20626	2015	1	2	7	38	8	1	383	Ki3xOh7B	DRIL38.150	72	15	25	45	70	32	25	37.3
NLB	20627	2015	1	2	7	38	9	1	384	Ki3xOh7B	DRIL38.088	72	10	30	45	60	34	16	36.7
NLB	20628	2015	1	2	7	38	10	1	385	Ki3xOh7B	DRIL38.154	73	10	30	50	75	34	18	40.8
NLB	20629	2015	1	2	7	38	11	1	386	Ki3xOh7B	DRIL38.185	75	15	30	50	75	24	14	41.5
NLB	20630	2015	1	2	7	38	12	1	387	Ki3xOh7B	DRIL38.086	75	10	30	55	75	30	8	42.5
NLB	20631	2015	1	2	7	38	13	1	388	Ki3xOh7B	DRIL38.026	75	10	35	55	75	34	18	44.2
NLB	20632	2015	1	2	7	38	14	1	389	Ki3xOh7B	DRIL38.134	75	10	35	55	75	22	8	44.2
NLB	20634	2015	1	2	7	38	16	1	391	Ki3xOh7B	DRIL38.029	NA	NA	NA	NA	NA	NA	NA	NA
NLB	20636	2015	1	2	7	38	18	1	393	Ki3xOh7B	DRIL38.060	75	10	30	50	70	32	18	40
NLB	20637	2015	1	2	7	38	19	1	394	Ki3xOh7B	DRIL38.061	75	10	35	50	80	34	22	43.3
NLB	20639	2015	1	2	7	38	21	1	396	Ki3xOh7B	DRIL38.188	70	10	25	45	65	28	14	35.8
NLB	20640	2015	1	2	7	38	22	1	397	Ki3xOh7B	DRIL38.194	75	10	25	45	65	26	6	35.8
NLB	20641	2015	1	2	7	38	23	1	398	Ki3xOh7B	DRIL38.160	75	5	10	45	55	32	18	28.3
NLB	20642	2015	1	2	7	38	24	1	399	Ki3xOh7B	DRIL38.147	75	10	15	45	55	34	16	30.8
NLB	20643	2015	1	2	8	38	25	1	400	Ki3xOh7B	DRIL38.171	75	10	15	45	55	30	10	30.8
NLB	20644	2015	1	2	8	38	26	1	401	Ki3xOh7B	DRIL38.104	NA	NA	NA	NA	NA	NA	NA	NA
NLB	20646	2015	1	2	8	38	28	1	403	Ki3xOh7B	DRIL38.067	75	10	20	45	55	40	22	32.5
NLB	20648	2015	1	2	8	39	27	1	405	Ki3xOh7B	DRIL38.141	75	10	25	45	60	44	61	35
NLB	20649	2015	1	2	8	39	26	1	406	Ki3xOh7B	DRIL38.225	75	10	20	20	45	30	12	22.3
NLB	20650	2015	1	2	8	39	25	1	407	Ki3xOh7B	DRIL38.073	75	5	15	40	70	32	16	30.6
NLB	20652	2015	1	2	8	39	23	1	409	Ki3xOh7B	DRIL38.011	75	10	20	35	50	32	20	28.3
NLB	20653	2015	1	2	8	39	22	1	410	Ki3xOh7B	DRIL38.143	75	10	15	40	70	30	12	31.3
NLB	20657	2015	1	2	8	39	18	1	414	Ki3xOh7B	DRIL38.175	75	10	15	40	55	26	16	29
NLB	20658	2015	1	2	8	39	17	1	415	Ki3xOh7B	DRIL38.051	75	10	20	40	60	32	10	31.5
NLB	20659	2015	1	2	8	39	16	1	416	Ki3xOh7B	DRIL38.219	NA	NA	NA	NA	NA	NA	NA	NA
NLB	20660	2015	1	2	8	39	15	1	417	Ki3xOh7B	DRIL38.179	NA	NA	NA	NA	NA	NA	NA	NA
NLB	20661	2015	1	2	8	39	14	1	418	Ki3xOh7B	DRIL38.052	NA	NA	NA	NA	NA	NA	NA	NA
NLB	20662	2015	1	2	9	39	13	1	419	Ki3xOh7B	DRIL38.021	75	10	25	40	65	32	16	34
NLB	20663	2015	1	2	9	39	12	1	420	Ki3xOh7B	DRIL38.144	76	10	25	40	50	34	25	31.7
NLB	20664	2015	1	2	9	39	11	1	421	Ki3xOh7B	DRIL38.048	75	10	20	40	70	34	18	33.1
NLB	20666	2015	1	2	9	39	9	1	423	Ki3xOh7B	DRIL38.017	75	5	10	25	60	28	14	22.1
NLB	20667	2015	1	2	9	39	8	1	424	Ki3xOh7B	DRIL38.113	NA	10	25	45	65	26	2	35.8
NLB	20668	2015	1	2	9	39	7	1	425	Ki3xOh7B	DRIL38.010	NA	NA	NA	NA	NA	NA	NA	NA
NLB	20669	2015	1	2	9	39	6	1	426	Ki3xOh7B	DRIL38.122	NA	NA	NA	NA	NA	NA	NA	NA
NLB	20671	2015	1	2	9	39	4	1	428	Ki3xOh7B	DRIL38.077	75	10	20	50	80	30	20	38.1
NLB	20672	2015	1	2	9	39	3	1	429	Ki3xOh7B	DRIL38.226	70	10	25	50	75	36	20	39
NLB	20673	2015	1	2	9	39	2	1	430	Ki3xOh7B	DRIL38.001	75	15	25	50	80	34	27	40.6
NLB	20674	2015	1	2	9	39	1	1	431	Ki3xOh7B	DRIL38.149	75	15	30	60	90	36	20	47.3
NLB	20675	2015	1	2	9	40	1	1	432	Ki3xOh7B	DRIL38.043	75	10	25	55	80	38	25	41.5
NLB	20676	2015	1	2	9	40	2	1	433	Ki3xOh7B	DRIL38.031	75	15	35	55	90	42	30	47.3
NLB	20677	2015	1	2	9	40	3	1	434	Ki3xOh7B	DRIL38.208	73	20	30	55	85	32	18	45.6
NLB	20678	2015	1	2	9	40	4	1	435	Ki3xOh7B	DRIL38.120	73	20	35	55	90	30	25	48.1
NLB	20679	2015	1	2	9	40	5	1	436	Ki3xOh7B	DRIL38.085	75	10	35	55	80	36	27	45
NLB	20680	2015	1	2	9	40	6	1	437	Ki3xOh7B	DRIL38.216	68	15	30	45	70	30	12	39
NLB	20681	2015	1	2	10	40	7	1	438	Ki3xOh7B	DRIL38.012	66	15	30	45	80	38	27	40.6
NLB	20682	2015	1	2	10	40	8	1	439	Ki3xOh7B	DRIL38.015	NA	NA	NA	NA	NA	NA	NA	NA
NLB	20683	2015	1	2	10	40	9	1	440	Ki3xOh7B	DRIL38.111	75	10	30	55	85	40	30	44
NLB	20684	2015	1	2	10	40	10	1	441	Ki3xOh7B	DRIL38.159	NA	10	25	55	90	28	18	43.1
NLB	20685	2015	1	2	10	40	11	1	442	Ki3xOh7B	DRIL38.033	75	10	25	40	50	30	16	31.7
NLB	20687	2015	1	2	10	40	13	1	444	Ki3xOh7B	DRIL38.142	75	10	20	50	75	34	22	37.3
NLB	20688	2015	1	2	10	40	14	1	445	Ki3xOh7B	DRIL38.035	NA	5	5	45	60	32	20	27.3
NLB	20689	2015	1	2	10	40	15	1	446	Ki3xOh7B	DRIL38.030	75	10	25	45	65	28	16	35.8
NLB	20690	2015	1	2	10	40	16	1	447	Ki3xOh7B	DRIL38.162	72	10	20	45	60	34	20	33.3
NLB	20691	2015	1	2	10	40	17	1	448	Ki3xOh7B	DRIL38.040	72	10	25	45	75	26	18	37.3
NLB	20693	2015	1	2	10	40	19	1	450	Ki3xOh7B	DRIL38.071	75	10	25	45	65	22	8	35.8
NLB	20694	2015	1	2	10	40	20	1	451	Ki3xOh7B	DRIL38.220	75	5	20	40	55	32	8	30
NLB	20695	2015	1	2	10	40	21	1	452	Ki3xOh7B	DRIL38.157	73	10	25	35	60	20	8	31.5
NLB	20696	2015	1	2	10	40	22	1	453	Ki3xOh7B	DRIL38.125	70	10	25	40	50	34	16	31.7
NLB	20697	2015	1	2	10	40	23	1	454	Ki3xOh7B	DRIL38.101	75	10	25	45	65	34	18	35.8
NLB	20698	2015	1	2	10	40	24	1	455	Ki3xOh7B	DRIL38.181	75	10	25	45	60	24	58	35
NLB	20699	2015	1	2	10	40	25	1	456	Ki3xOh7B	DRIL38.089	NA	NA	NA	NA	NA	NA	NA	NA
NLB	20700	2015	1	2	11	40	26	1	457	Ki3xOh7B	DRIL38.222	72	10	20	45	60	30	14	33.3
NLB	20701	2015	1	2	11	40	27	1	458	Ki3xOh7B	DRIL38.176	75	5	5	15	35	24	6	13.1
NLB	20703	2015	1	2	11	41	28	1	460	Ki3xOh7B	DRIL38.075	73	10	20	55	55	28	22	36
NLB	20704	2015	1	2	11	41	27	1	461	Ki3xOh7B	DRIL38.057	75	10	20	45	60	30	10	33.3
NLB	20707	2015	1	2	11	41	24	1	464	Ki3xOh7B	DRIL38.139	73	10	25	40	55	34	12	32.5
NLB	20708	2015	1	2	11	41	23	1	465	Ki3xOh7B	DRIL38.158	75	5	15	40	65	28	12	29.8
NLB	20709	2015	1	2	11	41	22	1	466	Ki3xOh7B	DRIL38.074	75	10	20	45	65	40	32	34
NLB	20710	2015	1	2	11	41	21	1	467	Ki3xOh7B	DRIL38.207	76	10	30	45	65	26	18	37.5
NLB	20711	2015	1	2	11	41	20	1	468	Ki3xOh7B	DRIL38.065	76	15	35	45	70	36	25	40.8
NLB	20712	2015	1	2	11	41	19	1	469	Ki3xOh7B	DRIL38.155	76	10	35	55	75	34	18	44.2
NLB	20713	2015	1	2	11	41	18	1	470	Ki3xOh7B	DRIL38.076	75	15	35	55	80	30	20	45.8
NLB	20715	2015	1	2	11	41	16	1	472	Ki3xOh7B	DRIL38.095	NA	10	25	45	65	32	18	35.8
NLB	20716	2015	1	2	11	41	15	1	473	Ki3xOh7B	DRIL38.103	75	15	30	45	70	32	20	39
NLB	20719	2015	1	2	12	41	12	1	476	Ki3xOh7B	DRIL38.072	75	15	35	45	70	34	22	40.8
NLB	20720	2015	1	2	12	41	11	1	477	Ki3xOh7B	DRIL38.223	70	10	25	35	50	30	20	30
NLB	20721	2015	1	2	12	41	10	1	478	Ki3xOh7B	DRIL38.156	73	10	25	45	75	26	20	37.3
NLB	20722	2015	1	2	12	41	9	1	479	Ki3xOh7B	DRIL38.004	75	10	30	45	75	38	30	39
NLB	20723	2015	1	2	12	41	8	1	480	Ki3xOh7B	DRIL38.126	75	10	30	50	75	40	25	40.8
NLB	20725	2015	1	2	12	41	6	1	482	Ki3xOh7B	DRIL38.168	67	10	25	50	75	32	14	39
NLB	20726	2015	1	2	12	41	5	1	483	Ki3xOh7B	DRIL38.116	74	20	35	55	85	42	32	47.3
NLB	20728	2015	1	2	12	41	3	1	485	Ki3xOh7B	DRIL38.041	71	15	25	50	80	34	18	40.6
NLB	20730	2015	1	2	12	41	1	1	487	Ki3xOh7B	DRIL38.228	75	15	30	50	75	34	16	41.5
NLB	20732	2015	1	2	12	42	2	1	489	Ki3xOh7B	DRIL38.032	74	15	35	50	70	9	34	42.5
NLB	20733	2015	1	2	12	42	3	1	490	Ki3xOh7B	DRIL38.138	74	10	35	55	75	44	34	44.2
NLB	20734	2015	1	2	12	42	4	1	491	Ki3xOh7B	DRIL38.119	72	10	30	50	75	32	22	40.8
NLB	20735	2015	1	2	12	42	5	1	492	Ki3xOh7B	DRIL38.096	75	10	25	50	60	38	27	36.7
NLB	20736	2015	1	2	12	42	6	1	493	Ki3xOh7B	DRIL38.106	69	15	30	55	85	36	22	44.8
NLB	20737	2015	1	2	12	42	7	1	494	Ki3xOh7B	DRIL38.034	74	15	30	50	70	38	30	40.8
NLB	20738	2015	1	2	13	42	8	1	495	Ki3xOh7B	DRIL38.115	75	10	25	50	70	30	14	38.3
NLB	20739	2015	1	2	13	42	9	1	496	Ki3xOh7B	DRIL38.046	69	15	35	55	80	32	27	45.8
NLB	20740	2015	1	2	13	42	10	1	497	Ki3xOh7B	DRIL38.081	69	15	35	55	80	34	20	45.8
NLB	20741	2015	1	2	13	42	11	1	498	Ki3xOh7B	DRIL38.003	69	20	35	50	75	42	22	44
NLB	20747	2015	1	2	13	42	17	1	504	Ki3xOh7B	DRIL38.069	75	10	30	50	75	24	10	40.8
NLB	20748	2015	1	2	13	42	18	1	505	Ki3xOh7B	DRIL38.145	NA	NA	NA	NA	NA	NA	NA	NA
NLB	20749	2015	1	2	13	42	19	1	506	Ki3xOh7B	DRIL38.114	73	15	25	40	55	34	27	33.3
NLB	20750	2015	1	2	13	42	20	1	507	Ki3xOh7B	DRIL38.020	73	10	25	45	55	30	22	34.2
NLB	20751	2015	1	2	13	42	21	1	508	Ki3xOh7B	DRIL38.201	72	10	10	40	55	42	25	27.3
NLB	20752	2015	1	2	13	42	22	1	509	Ki3xOh7B	DRIL38.045	NA	NA	NA	NA	NA	NA	NA	NA
NLB	20754	2015	1	2	13	42	24	1	511	Ki3xOh7B	DRIL38.006	75	10	25	45	75	34	20	37.3
NLB	20755	2015	1	2	13	42	25	1	512	Ki3xOh7B	DRIL38.009	75	10	25	55	75	34	18	40.8
NLB	20756	2015	1	2	13	42	26	1	513	Ki3xOh7B	DRIL38.016	75	10	25	40	55	36	14	32.5
NLB	20757	2015	1	2	14	42	27	1	514	Ki3xOh7B	DRIL38.112	75	10	20	45	60	36	22	33.3
NLB	20758	2015	1	2	14	42	28	1	515	Ki3xOh7B	DRIL38.109	75	10	25	45	60	34	22	35
NLB	20759	2015	1	2	14	43	28	1	516	Ki3xOh7B	DRIL38.183	75	5	15	35	65	36	27	28.1
NLB	20760	2015	1	2	14	43	27	1	517	Ki3xOh7B	DRIL38.028	73	15	25	40	70	28	16	35.6
NLB	20761	2015	1	2	14	43	26	1	518	Ki3xOh7B	DRIL38.063	75	10	20	40	60	32	8	31.5
NLB	20762	2015	1	2	14	43	25	1	519	Ki3xOh7B	DRIL38.022	72	10	20	40	65	36	16	32.3
NLB	20764	2015	1	2	14	43	23	1	521	Ki3xOh7B	DRIL38.050	71	15	35	40	65	36	27	38.3
NLB	20765	2015	1	2	14	43	22	1	522	Ki3xOh7B	DRIL38.047	74	15	30	40	60	34	12	35.8
NLB	20766	2015	1	2	14	43	21	1	523	Ki3xOh7B	DRIL38.023	75	10	30	45	65	28	16	37.5
NLB	20767	2015	1	2	14	43	20	1	524	Ki3xOh7B	DRIL38.191	NA	NA	NA	NA	NA	NA	NA	NA
NLB	20769	2015	1	2	14	43	18	1	526	Ki3xOh7B	DRIL38.224	74	15	40	50	75	38	22	45
NLB	20770	2015	1	2	14	43	17	1	527	Ki3xOh7B	DRIL38.055	75	15	30	50	60	42	32	39.2
NLB	20772	2015	1	2	14	43	15	1	529	Ki3xOh7B	DRIL38.097	71	20	35	50	70	40	27	43.3
NLB	20773	2015	1	2	14	43	14	1	530	Ki3xOh7B	DRIL38.146	72	20	35	55	65	38	30	44.2
NLB	20774	2015	1	2	14	43	13	1	531	Ki3xOh7B	DRIL38.180	NA	NA	NA	NA	NA	NA	NA	NA
NLB	20775	2015	1	2	14	43	12	1	532	Ki3xOh7B	DRIL38.197	72	10	20	40	65	40	25	32.3

## Sheet: GLS
trait	plot_nrsry	year	location	rep	block	range	row	field_block	plot_xprmnt	pedigree	entry	dta	sc1	sc2	sc3	sc4	eh	ph	audpc
GLS	34389	2014	1	1	1	113	40	1	1	Ki3xOh7B	DRIL38.152	NA	6	4.5	NA	NA	NA	NA	5.3
GLS	34390	2014	1	1	1	113	39	1	2	Ki3xOh7B	DRIL38.041	NA	6.5	5	NA	NA	NA	NA	5.8
GLS	34392	2014	1	1	1	113	37	1	4	Ki3xOh7B	DRIL38.205	NA	6.5	5	NA	NA	NA	NA	5.8
GLS	34394	2014	1	1	1	113	35	1	6	Ki3xOh7B	DRIL38.019	NA	7	5	NA	NA	NA	NA	6
GLS	34395	2014	1	1	1	113	34	1	7	Ki3xOh7B	DRIL38.030	NA	6.5	5.5	NA	NA	NA	NA	6
GLS	34396	2014	1	1	1	113	33	1	8	Ki3xOh7B	DRIL38.055	NA	7	5.5	NA	NA	NA	NA	6.3
GLS	34399	2014	1	1	1	113	30	1	11	Ki3xOh7B	DRIL38.202	NA	7	5	NA	NA	NA	NA	6
GLS	34400	2014	1	1	1	113	29	1	12	Ki3xOh7B	DRIL38.194	NA	6.5	5	NA	NA	NA	NA	5.8
GLS	34401	2014	1	1	1	113	28	1	13	Ki3xOh7B	DRIL38.190	NA	7.5	6	NA	NA	NA	NA	6.8
GLS	34402	2014	1	1	1	113	27	1	14	Ki3xOh7B	DRIL38.106	NA	7	5	NA	NA	NA	NA	6
GLS	34403	2014	1	1	1	113	26	1	15	Ki3xOh7B	DRIL38.191	NA	6.5	4	NA	NA	NA	NA	5.3
GLS	34404	2014	1	1	1	113	25	1	16	Ki3xOh7B	DRIL38.049	NA	NA	NA	NA	NA	NA	NA	NA
GLS	34405	2014	1	1	1	113	24	1	17	Ki3xOh7B	DRIL38.096	NA	7	6	NA	NA	NA	NA	6.5
GLS	34406	2014	1	1	1	113	23	1	18	Ki3xOh7B	DRIL38.011	NA	7	5	NA	NA	NA	NA	6
GLS	34407	2014	1	1	1	113	22	1	19	Ki3xOh7B	DRIL38.166	NA	6.5	5	NA	NA	NA	NA	5.8
GLS	34408	2014	1	1	2	113	21	1	20	Ki3xOh7B	DRIL38.229	NA	6	4	NA	NA	NA	NA	5
GLS	34409	2014	1	1	2	113	20	1	21	Ki3xOh7B	DRIL38.222	NA	NA	NA	NA	NA	NA	NA	NA
GLS	34411	2014	1	1	2	113	18	1	23	Ki3xOh7B	DRIL38.134	NA	6.5	5	NA	NA	NA	NA	5.8
GLS	34412	2014	1	1	2	113	17	1	24	Ki3xOh7B	DRIL38.181	NA	7.5	6	NA	NA	NA	NA	6.8
GLS	34413	2014	1	1	2	113	16	1	25	Ki3xOh7B	DRIL38.047	NA	6.5	4.5	NA	NA	NA	NA	5.5
GLS	34414	2014	1	1	2	113	15	1	26	Ki3xOh7B	DRIL38.038	NA	7	5	NA	NA	NA	NA	6
GLS	34415	2014	1	1	2	113	14	1	27	Ki3xOh7B	DRIL38.057	NA	6	5	NA	NA	NA	NA	5.5
GLS	34416	2014	1	1	2	113	13	1	28	Ki3xOh7B	DRIL38.023	NA	7	5	NA	NA	NA	NA	6
GLS	34418	2014	1	1	2	113	11	1	30	Ki3xOh7B	DRIL38.147	NA	7.5	6.5	NA	NA	NA	NA	7
GLS	34419	2014	1	1	2	113	10	1	31	Ki3xOh7B	DRIL38.086	NA	7.5	6	NA	NA	NA	NA	6.8
GLS	34420	2014	1	1	2	113	9	1	32	Ki3xOh7B	DRIL38.129	NA	NA	NA	NA	NA	NA	NA	NA
GLS	34421	2014	1	1	2	113	8	1	33	Ki3xOh7B	DRIL38.075	NA	7.5	6.5	NA	NA	NA	NA	7
GLS	34422	2014	1	1	2	113	7	1	34	Ki3xOh7B	DRIL38.083	NA	7	6	NA	NA	NA	NA	6.5
GLS	34423	2014	1	1	2	113	6	1	35	Ki3xOh7B	DRIL38.004	NA	7.5	5.5	NA	NA	NA	NA	6.5
GLS	34424	2014	1	1	2	113	5	1	36	Ki3xOh7B	DRIL38.207	NA	7.5	5	NA	NA	NA	NA	6.3
GLS	34425	2014	1	1	2	114	5	1	37	Ki3xOh7B	DRIL38.015	NA	7	5	NA	NA	NA	NA	6
GLS	34426	2014	1	1	2	114	6	1	38	Ki3xOh7B	DRIL38.056	NA	7	5	NA	NA	NA	NA	6
GLS	34427	2014	1	1	3	114	7	1	39	Ki3xOh7B	DRIL38.210	NA	7.5	6	NA	NA	NA	NA	6.8
GLS	34428	2014	1	1	3	114	8	1	40	Ki3xOh7B	DRIL38.058	NA	7.5	6	NA	NA	NA	NA	6.8
GLS	34429	2014	1	1	3	114	9	1	41	Ki3xOh7B	DRIL38.177	NA	7.5	6.5	NA	NA	NA	NA	7
GLS	34430	2014	1	1	3	114	10	1	42	Ki3xOh7B	DRIL38.223	NA	7.5	4	NA	NA	NA	NA	5.8
GLS	34431	2014	1	1	3	114	11	1	43	Ki3xOh7B	DRIL38.118	NA	7	5	NA	NA	NA	NA	6
GLS	34432	2014	1	1	3	114	12	1	44	Ki3xOh7B	DRIL38.203	NA	7	5	NA	NA	NA	NA	6
GLS	34434	2014	1	1	3	114	14	1	46	Ki3xOh7B	DRIL38.197	NA	7	6.5	NA	NA	NA	NA	6.8
GLS	34435	2014	1	1	3	114	15	1	47	Ki3xOh7B	DRIL38.095	NA	7	5	NA	NA	NA	NA	6
GLS	34436	2014	1	1	3	114	16	1	48	Ki3xOh7B	DRIL38.230	NA	NA	NA	NA	NA	NA	NA	NA
GLS	34438	2014	1	1	3	114	18	1	50	Ki3xOh7B	DRIL38.154	NA	7	5	NA	NA	NA	NA	6
GLS	34439	2014	1	1	3	114	19	1	51	Ki3xOh7B	DRIL38.080	NA	7	5	NA	NA	NA	NA	6
GLS	34440	2014	1	1	3	114	20	1	52	Ki3xOh7B	DRIL38.052	NA	NA	NA	NA	NA	NA	NA	NA
GLS	34441	2014	1	1	3	114	21	1	53	Ki3xOh7B	DRIL38.169	NA	7	5	NA	NA	NA	NA	6
GLS	34442	2014	1	1	3	114	22	1	54	Ki3xOh7B	DRIL38.195	NA	7	6	NA	NA	NA	NA	6.5
GLS	34443	2014	1	1	3	114	23	1	55	Ki3xOh7B	DRIL38.073	NA	7	6	NA	NA	NA	NA	6.5
GLS	34444	2014	1	1	3	114	24	1	56	Ki3xOh7B	DRIL38.211	NA	7	4	NA	NA	NA	NA	5.5
GLS	34446	2014	1	1	4	114	26	1	58	Ki3xOh7B	DRIL38.139	NA	7	6	NA	NA	NA	NA	6.5
GLS	34447	2014	1	1	4	114	27	1	59	Ki3xOh7B	DRIL38.089	NA	NA	NA	NA	NA	NA	NA	NA
GLS	34448	2014	1	1	4	114	28	1	60	Ki3xOh7B	DRIL38.050	NA	7	5.5	NA	NA	NA	NA	6.3
GLS	34449	2014	1	1	4	114	29	1	61	Ki3xOh7B	DRIL38.088	NA	6.5	4	NA	NA	NA	NA	5.3
GLS	34450	2014	1	1	4	114	30	1	62	Ki3xOh7B	DRIL38.070	NA	6.5	4	NA	NA	NA	NA	5.3
GLS	34451	2014	1	1	4	114	31	1	63	Ki3xOh7B	DRIL38.090	NA	6	4	NA	NA	NA	NA	5
GLS	34453	2014	1	1	4	114	33	1	65	Ki3xOh7B	DRIL38.022	NA	7.5	5	NA	NA	NA	NA	6.3
GLS	34454	2014	1	1	4	114	34	1	66	Ki3xOh7B	DRIL38.146	NA	7	5	NA	NA	NA	NA	6
GLS	34455	2014	1	1	4	114	35	1	67	Ki3xOh7B	DRIL38.085	NA	6.5	4.5	NA	NA	NA	NA	5.5
GLS	34457	2014	1	1	4	114	37	1	69	Ki3xOh7B	DRIL38.068	NA	NA	NA	NA	NA	NA	NA	NA
GLS	34458	2014	1	1	4	114	38	1	70	Ki3xOh7B	DRIL38.065	NA	7	5	NA	NA	NA	NA	6
GLS	34461	2014	1	1	4	114	41	1	73	Ki3xOh7B	DRIL38.186	NA	7	5	NA	NA	NA	NA	6
GLS	34462	2014	1	1	4	114	42	1	74	Ki3xOh7B	DRIL38.114	NA	7	5	NA	NA	NA	NA	6
GLS	34463	2014	1	1	4	114	43	1	75	Ki3xOh7B	DRIL38.103	NA	6.5	5	NA	NA	NA	NA	5.8
GLS	34464	2014	1	1	4	114	44	1	76	Ki3xOh7B	DRIL38.051	NA	7.5	5	NA	NA	NA	NA	6.3
GLS	34465	2014	1	1	5	114	45	1	77	Ki3xOh7B	DRIL38.097	NA	7	5	NA	NA	NA	NA	6
GLS	34466	2014	1	1	5	114	46	1	78	Ki3xOh7B	DRIL38.216	NA	6	4	NA	NA	NA	NA	5
GLS	34467	2014	1	1	5	114	47	1	79	Ki3xOh7B	DRIL38.136	NA	6.5	5	NA	NA	NA	NA	5.8
GLS	34468	2014	1	1	5	114	48	1	80	Ki3xOh7B	DRIL38.024	NA	7	5	NA	NA	NA	NA	6
GLS	34470	2014	1	1	5	114	50	1	82	Ki3xOh7B	DRIL38.225	NA	7.5	7	NA	NA	NA	NA	7.3
GLS	34473	2014	1	1	5	114	53	1	85	Ki3xOh7B	DRIL38.078	NA	7	5	NA	NA	NA	NA	6
GLS	34474	2014	1	1	5	114	54	1	86	Ki3xOh7B	DRIL38.172	NA	7.5	7	NA	NA	NA	NA	7.3
GLS	34475	2014	1	1	5	114	55	1	87	Ki3xOh7B	DRIL38.001	NA	7	6.5	NA	NA	NA	NA	6.8
GLS	34476	2014	1	1	5	114	56	1	88	Ki3xOh7B	DRIL38.138	NA	6.5	4.5	NA	NA	NA	NA	5.5
GLS	34478	2014	1	1	5	114	58	1	90	Ki3xOh7B	DRIL38.127	NA	6.5	5	NA	NA	NA	NA	5.8
GLS	34479	2014	1	1	5	114	59	1	91	Ki3xOh7B	DRIL38.119	NA	7	5	NA	NA	NA	NA	6
GLS	34480	2014	1	1	5	114	60	1	92	Ki3xOh7B	DRIL38.220	NA	7	5.5	NA	NA	NA	NA	6.3
GLS	34482	2014	1	1	5	115	59	1	94	Ki3xOh7B	DRIL38.037	NA	7	5	NA	NA	NA	NA	6
GLS	34483	2014	1	1	5	115	58	1	95	Ki3xOh7B	DRIL38.176	NA	7.5	6	NA	NA	NA	NA	6.8
GLS	34484	2014	1	1	6	115	57	1	96	Ki3xOh7B	DRIL38.160	NA	7	5.5	NA	NA	NA	NA	6.3
GLS	34485	2014	1	1	6	115	56	1	97	Ki3xOh7B	DRIL38.111	NA	7	5	NA	NA	NA	NA	6
GLS	34486	2014	1	1	6	115	55	1	98	Ki3xOh7B	DRIL38.091	NA	6.5	4	NA	NA	NA	NA	5.3
GLS	34487	2014	1	1	6	115	54	1	99	Ki3xOh7B	DRIL38.027	NA	6.5	6	NA	NA	NA	NA	6.3
GLS	34488	2014	1	1	6	115	53	1	100	Ki3xOh7B	DRIL38.014	NA	7	4.5	NA	NA	NA	NA	5.8
GLS	34489	2014	1	1	6	115	52	1	101	Ki3xOh7B	DRIL38.157	NA	6	4.5	NA	NA	NA	NA	5.3
GLS	34490	2014	1	1	6	115	51	1	102	Ki3xOh7B	DRIL38.149	NA	7	5	NA	NA	NA	NA	6
GLS	34491	2014	1	1	6	115	50	1	103	Ki3xOh7B	DRIL38.026	NA	6.5	4.5	NA	NA	NA	NA	5.5
GLS	34492	2014	1	1	6	115	49	1	104	Ki3xOh7B	DRIL38.142	NA	7	5	NA	NA	NA	NA	6
GLS	34493	2014	1	1	6	115	48	1	105	Ki3xOh7B	DRIL38.104	NA	6.5	5	NA	NA	NA	NA	5.8
GLS	34494	2014	1	1	6	115	47	1	106	Ki3xOh7B	DRIL38.232	NA	6.5	5	NA	NA	NA	NA	5.8
GLS	34495	2014	1	1	6	115	46	1	107	Ki3xOh7B	DRIL38.054	NA	7	5	NA	NA	NA	NA	6
GLS	34501	2014	1	1	6	115	40	1	113	Ki3xOh7B	DRIL38.206	NA	7	6	NA	NA	NA	NA	6.5
GLS	34502	2014	1	1	6	115	39	1	114	Ki3xOh7B	DRIL38.231	NA	7	5	NA	NA	NA	NA	6
GLS	34503	2014	1	1	7	115	38	1	115	Ki3xOh7B	DRIL38.018	NA	7	5	NA	NA	NA	NA	6
GLS	34504	2014	1	1	7	115	37	1	116	Ki3xOh7B	DRIL38.108	NA	7	6.5	NA	NA	NA	NA	6.8
GLS	34506	2014	1	1	7	115	35	1	118	Ki3xOh7B	DRIL38.082	NA	7.5	6.5	NA	NA	NA	NA	7
GLS	34507	2014	1	1	7	115	34	1	119	Ki3xOh7B	DRIL38.150	NA	6.5	5	NA	NA	NA	NA	5.8
GLS	34509	2014	1	1	7	115	32	1	121	Ki3xOh7B	DRIL38.184	NA	6.5	4	NA	NA	NA	NA	5.3
GLS	34511	2014	1	1	7	115	30	1	123	Ki3xOh7B	DRIL38.046	NA	6	4	NA	NA	NA	NA	5
GLS	34512	2014	1	1	7	115	29	1	124	Ki3xOh7B	DRIL38.029	NA	6.5	5	NA	NA	NA	NA	5.8
GLS	34516	2014	1	1	7	115	25	1	128	Ki3xOh7B	DRIL38.048	NA	7	4	NA	NA	NA	NA	5.5
GLS	34517	2014	1	1	7	115	24	1	129	Ki3xOh7B	DRIL38.187	NA	7	4	NA	NA	NA	NA	5.5
GLS	34518	2014	1	1	7	115	23	1	130	Ki3xOh7B	DRIL38.155	NA	6.5	5	NA	NA	NA	NA	5.8
GLS	34521	2014	1	1	7	115	20	1	133	Ki3xOh7B	DRIL38.115	NA	7	5.5	NA	NA	NA	NA	6.3
GLS	34522	2014	1	1	8	115	19	1	134	Ki3xOh7B	DRIL38.141	NA	7	5	NA	NA	NA	NA	6
GLS	34523	2014	1	1	8	115	18	1	135	Ki3xOh7B	DRIL38.179	NA	7.5	7	NA	NA	NA	NA	7.3
GLS	34525	2014	1	1	8	115	16	1	137	Ki3xOh7B	DRIL38.199	NA	7.5	7	NA	NA	NA	NA	7.3
GLS	34526	2014	1	1	8	115	15	1	138	Ki3xOh7B	DRIL38.012	NA	7.5	7	NA	NA	NA	NA	7.3
GLS	34529	2014	1	1	8	115	12	1	141	Ki3xOh7B	DRIL38.153	NA	7.5	5	NA	NA	NA	NA	6.3
GLS	34530	2014	1	1	8	115	11	1	142	Ki3xOh7B	DRIL38.122	NA	6.5	5	NA	NA	NA	NA	5.8
GLS	34531	2014	1	1	8	115	10	1	143	Ki3xOh7B	DRIL38.168	NA	7	5	NA	NA	NA	NA	6
GLS	34533	2014	1	1	8	115	8	1	145	Ki3xOh7B	DRIL38.132	NA	7	5	NA	NA	NA	NA	6
GLS	34534	2014	1	1	8	115	7	1	146	Ki3xOh7B	DRIL38.185	NA	7	5	NA	NA	NA	NA	6
GLS	34535	2014	1	1	8	115	6	1	147	Ki3xOh7B	DRIL38.151	NA	7	5	NA	NA	NA	NA	6
GLS	34537	2014	1	1	8	116	5	1	149	Ki3xOh7B	DRIL38.133	NA	7.5	7	NA	NA	NA	NA	7.3
GLS	34539	2014	1	1	8	116	7	1	151	Ki3xOh7B	DRIL38.158	NA	7.5	7.5	NA	NA	NA	NA	7.5
GLS	34540	2014	1	1	8	116	8	1	152	Ki3xOh7B	DRIL38.140	NA	7	6	NA	NA	NA	NA	6.5
GLS	34541	2014	1	1	9	116	9	1	153	Ki3xOh7B	DRIL38.208	NA	7	6	NA	NA	NA	NA	6.5
GLS	34542	2014	1	1	9	116	10	1	154	Ki3xOh7B	DRIL38.006	NA	7	4	NA	NA	NA	NA	5.5
GLS	34543	2014	1	1	9	116	11	1	155	Ki3xOh7B	DRIL38.009	NA	NA	NA	NA	NA	NA	NA	NA
GLS	34544	2014	1	1	9	116	12	1	156	Ki3xOh7B	DRIL38.145	NA	7	6.5	NA	NA	NA	NA	6.8
GLS	34546	2014	1	1	9	116	14	1	158	Ki3xOh7B	DRIL38.193	NA	7.5	6	NA	NA	NA	NA	6.8
GLS	34547	2014	1	1	9	116	15	1	159	Ki3xOh7B	DRIL38.117	NA	7.5	7	NA	NA	NA	NA	7.3
GLS	34549	2014	1	1	9	116	17	1	161	Ki3xOh7B	DRIL38.063	NA	7	5	NA	NA	NA	NA	6
GLS	34550	2014	1	1	9	116	18	1	162	Ki3xOh7B	DRIL38.175	NA	7	6	NA	NA	NA	NA	6.5
GLS	34552	2014	1	1	9	116	20	1	164	Ki3xOh7B	DRIL38.010	NA	7	5	NA	NA	NA	NA	6
GLS	34553	2014	1	1	9	116	21	1	165	Ki3xOh7B	DRIL38.178	NA	7	5	NA	NA	NA	NA	6
GLS	34555	2014	1	1	9	116	23	1	167	Ki3xOh7B	DRIL38.036	NA	6.5	5	NA	NA	NA	NA	5.8
GLS	34556	2014	1	1	9	116	24	1	168	Ki3xOh7B	DRIL38.045	NA	7.5	6	NA	NA	NA	NA	6.8
GLS	34559	2014	1	1	9	116	27	1	171	Ki3xOh7B	DRIL38.016	NA	7	6	NA	NA	NA	NA	6.5
GLS	34560	2014	1	1	10	116	28	1	172	Ki3xOh7B	DRIL38.105	NA	6.5	5	NA	NA	NA	NA	5.8
GLS	34561	2014	1	1	10	116	29	1	173	Ki3xOh7B	DRIL38.061	NA	6.5	5	NA	NA	NA	NA	5.8
GLS	34562	2014	1	1	10	116	30	1	174	Ki3xOh7B	DRIL38.130	NA	6.5	5	NA	NA	NA	NA	5.8
GLS	34563	2014	1	1	10	116	31	1	175	Ki3xOh7B	DRIL38.221	NA	6	4	NA	NA	NA	NA	5
GLS	34565	2014	1	1	10	116	33	1	177	Ki3xOh7B	DRIL38.044	NA	6.5	5	NA	NA	NA	NA	5.8
GLS	34566	2014	1	1	10	116	34	1	178	Ki3xOh7B	DRIL38.062	NA	6.5	5	NA	NA	NA	NA	5.8
GLS	34567	2014	1	1	10	116	35	1	179	Ki3xOh7B	DRIL38.040	NA	7	5	NA	NA	NA	NA	6
GLS	34568	2014	1	1	10	116	36	1	180	Ki3xOh7B	DRIL38.183	NA	6.5	5	NA	NA	NA	NA	5.8
GLS	34569	2014	1	1	10	116	37	1	181	Ki3xOh7B	DRIL38.192	NA	8	7	NA	NA	NA	NA	7.5
GLS	34570	2014	1	1	10	116	38	1	182	Ki3xOh7B	DRIL38.008	NA	6.5	5	NA	NA	NA	NA	5.8
GLS	34572	2014	1	1	10	116	40	1	184	Ki3xOh7B	DRIL38.116	NA	6.5	5	NA	NA	NA	NA	5.8
GLS	34573	2014	1	1	10	116	41	1	185	Ki3xOh7B	DRIL38.077	NA	7	6	NA	NA	NA	NA	6.5
GLS	34574	2014	1	1	10	116	42	1	186	Ki3xOh7B	DRIL38.196	NA	7	5.5	NA	NA	NA	NA	6.3
GLS	34575	2014	1	1	10	116	43	1	187	Ki3xOh7B	DRIL38.180	NA	7	5	NA	NA	NA	NA	6
GLS	34576	2014	1	1	10	116	44	1	188	Ki3xOh7B	DRIL38.081	NA	7	5	NA	NA	NA	NA	6
GLS	34577	2014	1	1	10	116	45	1	189	Ki3xOh7B	DRIL38.032	NA	7	5.5	NA	NA	NA	NA	6.3
GLS	34578	2014	1	1	10	116	46	1	190	Ki3xOh7B	DRIL38.209	NA	7.5	5	NA	NA	NA	NA	6.3
GLS	34579	2014	1	1	11	116	47	1	191	Ki3xOh7B	DRIL38.228	NA	7	5	NA	NA	NA	NA	6
GLS	34580	2014	1	1	11	116	48	1	192	Ki3xOh7B	DRIL38.094	NA	7	5.5	NA	NA	NA	NA	6.3
GLS	34581	2014	1	1	11	116	49	1	193	Ki3xOh7B	DRIL38.214	NA	7	5	NA	NA	NA	NA	6
GLS	34582	2014	1	1	11	116	50	1	194	Ki3xOh7B	DRIL38.064	NA	7	6	NA	NA	NA	NA	6.5
GLS	34585	2014	1	1	11	116	53	1	197	Ki3xOh7B	DRIL38.072	NA	7	5	NA	NA	NA	NA	6
GLS	34586	2014	1	1	11	116	54	1	198	Ki3xOh7B	DRIL38.218	NA	7	4.5	NA	NA	NA	NA	5.8
GLS	34587	2014	1	1	11	116	55	1	199	Ki3xOh7B	DRIL38.120	NA	6.5	4.5	NA	NA	NA	NA	5.5
GLS	34588	2014	1	1	11	116	56	1	200	Ki3xOh7B	DRIL38.093	NA	6.5	4.5	NA	NA	NA	NA	5.5
GLS	34590	2014	1	1	11	116	58	1	202	Ki3xOh7B	DRIL38.170	NA	8	8	NA	NA	NA	NA	8
GLS	34591	2014	1	1	11	116	59	1	203	Ki3xOh7B	DRIL38.131	NA	7	6	NA	NA	NA	NA	6.5
GLS	34592	2014	1	1	11	116	60	1	204	Ki3xOh7B	DRIL38.035	NA	7	5	NA	NA	NA	NA	6
GLS	34593	2014	1	1	11	117	60	1	205	Ki3xOh7B	DRIL38.059	NA	7.5	7	NA	NA	NA	NA	7.3
GLS	34594	2014	1	1	11	117	59	1	206	Ki3xOh7B	DRIL38.128	NA	7	5	NA	NA	NA	NA	6
GLS	34595	2014	1	1	11	117	58	1	207	Ki3xOh7B	DRIL38.148	NA	7.5	6.5	NA	NA	NA	NA	7
GLS	34596	2014	1	1	11	117	57	1	208	Ki3xOh7B	DRIL38.167	NA	7	6.5	NA	NA	NA	NA	6.8
GLS	34598	2014	1	1	12	117	55	1	210	Ki3xOh7B	DRIL38.033	NA	7	5	NA	NA	NA	NA	6
GLS	34600	2014	1	1	12	117	53	1	212	Ki3xOh7B	DRIL38.076	NA	6.5	5	NA	NA	NA	NA	5.8
GLS	34601	2014	1	1	12	117	52	1	213	Ki3xOh7B	DRIL38.025	NA	7.5	6.5	NA	NA	NA	NA	7
GLS	34602	2014	1	1	12	117	51	1	214	Ki3xOh7B	DRIL38.125	NA	7.5	5.5	NA	NA	NA	NA	6.5
GLS	34603	2014	1	1	12	117	50	1	215	Ki3xOh7B	DRIL38.109	NA	7	5	NA	NA	NA	NA	6
GLS	34604	2014	1	1	12	117	49	1	216	Ki3xOh7B	DRIL38.126	NA	7	5	NA	NA	NA	NA	6
GLS	34607	2014	1	1	12	117	46	1	219	Ki3xOh7B	DRIL38.219	NA	7.5	6.5	NA	NA	NA	NA	7
GLS	34608	2014	1	1	12	117	45	1	220	Ki3xOh7B	DRIL38.137	NA	6.5	3	NA	NA	NA	NA	4.8
GLS	34610	2014	1	1	12	117	43	1	222	Ki3xOh7B	DRIL38.217	NA	7	5	NA	NA	NA	NA	6
GLS	34611	2014	1	1	12	117	42	1	223	Ki3xOh7B	DRIL38.067	NA	6.5	5	NA	NA	NA	NA	5.8
GLS	34612	2014	1	1	12	117	41	1	224	Ki3xOh7B	DRIL38.079	NA	6.5	4.5	NA	NA	NA	NA	5.5
GLS	34613	2014	1	1	12	117	40	1	225	Ki3xOh7B	DRIL38.043	NA	NA	NA	NA	NA	NA	NA	NA
GLS	34614	2014	1	1	12	117	39	1	226	Ki3xOh7B	DRIL38.020	NA	7	6.5	NA	NA	NA	NA	6.8
GLS	34615	2014	1	1	12	117	38	1	227	Ki3xOh7B	DRIL38.162	NA	7	5	NA	NA	NA	NA	6
GLS	34616	2014	1	1	12	117	37	1	228	Ki3xOh7B	DRIL38.113	NA	7	6	NA	NA	NA	NA	6.5
GLS	34617	2014	1	1	13	117	36	1	229	Ki3xOh7B	DRIL38.053	NA	7	6.5	NA	NA	NA	NA	6.8
GLS	34619	2014	1	1	13	117	34	1	231	Ki3xOh7B	DRIL38.074	NA	7	5	NA	NA	NA	NA	6
GLS	34620	2014	1	1	13	117	33	1	232	Ki3xOh7B	DRIL38.066	NA	7	5.5	NA	NA	NA	NA	6.3
GLS	34621	2014	1	1	13	117	32	1	233	Ki3xOh7B	DRIL38.143	NA	7.5	5	NA	NA	NA	NA	6.3
GLS	34622	2014	1	1	13	117	31	1	234	Ki3xOh7B	DRIL38.071	NA	7	4.5	NA	NA	NA	NA	5.8
GLS	34623	2014	1	1	13	117	30	1	235	Ki3xOh7B	DRIL38.159	NA	7	6	NA	NA	NA	NA	6.5
GLS	34624	2014	1	1	13	117	29	1	236	Ki3xOh7B	DRIL38.226	NA	7	5	NA	NA	NA	NA	6
GLS	34626	2014	1	1	13	117	27	1	238	Ki3xOh7B	DRIL38.021	NA	7	5.5	NA	NA	NA	NA	6.3
GLS	34627	2014	1	1	13	117	26	1	239	Ki3xOh7B	DRIL38.003	NA	7.5	6	NA	NA	NA	NA	6.8
GLS	34628	2014	1	1	13	117	25	1	240	Ki3xOh7B	DRIL38.188	NA	7.5	5	NA	NA	NA	NA	6.3
GLS	34629	2014	1	1	13	117	24	1	241	Ki3xOh7B	DRIL38.031	NA	7	5	NA	NA	NA	NA	6
GLS	34630	2014	1	1	13	117	23	1	242	Ki3xOh7B	DRIL38.110	NA	7.5	6	NA	NA	NA	NA	6.8
GLS	34631	2014	1	1	13	117	22	1	243	Ki3xOh7B	DRIL38.123	NA	7.5	5.5	NA	NA	NA	NA	6.5
GLS	34632	2014	1	1	13	117	21	1	244	Ki3xOh7B	DRIL38.007	NA	7.5	5	NA	NA	NA	NA	6.3
GLS	34633	2014	1	1	13	117	20	1	245	Ki3xOh7B	DRIL38.017	NA	7	6	NA	NA	NA	NA	6.5
GLS	34635	2014	1	1	13	117	18	1	247	Ki3xOh7B	DRIL38.227	NA	6.5	5.5	NA	NA	NA	NA	6
GLS	34636	2014	1	1	14	117	17	1	248	Ki3xOh7B	DRIL38.171	NA	7	5.5	NA	NA	NA	NA	6.3
GLS	34637	2014	1	1	14	117	16	1	249	Ki3xOh7B	DRIL38.112	NA	7	6	NA	NA	NA	NA	6.5
GLS	34638	2014	1	1	14	117	15	1	250	Ki3xOh7B	DRIL38.144	NA	7	6	NA	NA	NA	NA	6.5
GLS	34639	2014	1	1	14	117	14	1	251	Ki3xOh7B	DRIL38.028	NA	7	5	NA	NA	NA	NA	6
GLS	34641	2014	1	1	14	117	12	1	253	Ki3xOh7B	DRIL38.198	NA	7	6	NA	NA	NA	NA	6.5
GLS	34642	2014	1	1	14	117	11	1	254	Ki3xOh7B	DRIL38.034	NA	7	6	NA	NA	NA	NA	6.5
GLS	34644	2014	1	1	14	117	9	1	256	Ki3xOh7B	DRIL38.084	NA	7.5	6.5	NA	NA	NA	NA	7
GLS	34645	2014	1	1	14	117	8	1	257	Ki3xOh7B	DRIL38.201	NA	7	6	NA	NA	NA	NA	6.5
GLS	34646	2014	1	1	14	117	7	1	258	Ki3xOh7B	DRIL38.101	NA	7.5	5	NA	NA	NA	NA	6.3
GLS	34647	2014	1	1	14	117	6	1	259	Ki3xOh7B	DRIL38.069	NA	7	5	NA	NA	NA	NA	6
GLS	34648	2014	1	1	14	117	5	1	260	Ki3xOh7B	DRIL38.224	NA	7	5	NA	NA	NA	NA	6
GLS	34649	2014	1	1	14	118	5	1	261	Ki3xOh7B	DRIL38.156	NA	7	6.5	NA	NA	NA	NA	6.8
GLS	34650	2014	1	1	14	118	6	1	262	Ki3xOh7B	DRIL38.060	NA	7.5	6.5	NA	NA	NA	NA	7
GLS	34652	2014	1	1	14	118	8	1	264	Ki3xOh7B	DRIL38.163	NA	7	5	NA	NA	NA	NA	6
GLS	34653	2014	1	1	14	118	9	1	265	Ki3xOh7B	DRIL38.189	NA	6.5	5	NA	NA	NA	NA	5.8
GLS	34654	2014	1	1	14	118	10	1	266	Ki3xOh7B	DRIL38.107	NA	7	5	NA	NA	NA	NA	6
GLS	35105	2014	1	2	1	126	13	1	267	Ki3xOh7B	DRIL38.067	NA	7	6.5	NA	NA	NA	NA	6.8
GLS	35106	2014	1	2	1	126	14	1	268	Ki3xOh7B	DRIL38.184	NA	7	4	NA	NA	NA	NA	5.5
GLS	35107	2014	1	2	1	126	15	1	269	Ki3xOh7B	DRIL38.027	NA	7	6.5	NA	NA	NA	NA	6.8
GLS	35108	2014	1	2	1	126	16	1	270	Ki3xOh7B	DRIL38.084	NA	7.5	6	NA	NA	NA	NA	6.8
GLS	35109	2014	1	2	1	126	17	1	271	Ki3xOh7B	DRIL38.086	NA	7	5	NA	NA	NA	NA	6
GLS	35111	2014	1	2	1	126	19	1	273	Ki3xOh7B	DRIL38.149	NA	7.5	5.5	NA	NA	NA	NA	6.5
GLS	35113	2014	1	2	1	126	21	1	275	Ki3xOh7B	DRIL38.089	NA	6.5	4	NA	NA	NA	NA	5.3
GLS	35114	2014	1	2	1	126	22	1	276	Ki3xOh7B	DRIL38.183	NA	6.5	4	NA	NA	NA	NA	5.3
GLS	35115	2014	1	2	1	126	23	1	277	Ki3xOh7B	DRIL38.071	NA	7	5	NA	NA	NA	NA	6
GLS	35117	2014	1	2	1	126	25	1	279	Ki3xOh7B	DRIL38.030	NA	7	5	NA	NA	NA	NA	6
GLS	35119	2014	1	2	1	126	27	1	281	Ki3xOh7B	DRIL38.230	NA	7.5	5.5	NA	NA	NA	NA	6.5
GLS	35120	2014	1	2	1	126	28	1	282	Ki3xOh7B	DRIL38.069	NA	6.5	3	NA	NA	NA	NA	4.8
GLS	35121	2014	1	2	1	126	29	1	283	Ki3xOh7B	DRIL38.228	NA	7	6	NA	NA	NA	NA	6.5
GLS	35123	2014	1	2	1	126	31	1	285	Ki3xOh7B	DRIL38.225	NA	7.5	6.5	NA	NA	NA	NA	7
GLS	35125	2014	1	2	2	126	33	1	287	Ki3xOh7B	DRIL38.108	NA	7	6.5	NA	NA	NA	NA	6.8
GLS	35127	2014	1	2	2	126	35	1	289	Ki3xOh7B	DRIL38.117	NA	7	5	NA	NA	NA	NA	6
GLS	35128	2014	1	2	2	126	36	1	290	Ki3xOh7B	DRIL38.060	NA	7	5	NA	NA	NA	NA	6
GLS	35129	2014	1	2	2	126	37	1	291	Ki3xOh7B	DRIL38.130	NA	NA	NA	NA	NA	NA	NA	NA
GLS	35130	2014	1	2	2	126	38	1	292	Ki3xOh7B	DRIL38.106	NA	7	5.5	NA	NA	NA	NA	6.3
GLS	35132	2014	1	2	2	126	40	1	294	Ki3xOh7B	DRIL38.206	NA	7	5	NA	NA	NA	NA	6
GLS	35133	2014	1	2	2	126	41	1	295	Ki3xOh7B	DRIL38.064	NA	7.5	5.5	NA	NA	NA	NA	6.5
GLS	35134	2014	1	2	2	126	42	1	296	Ki3xOh7B	DRIL38.123	NA	7.5	6	NA	NA	NA	NA	6.8
GLS	35135	2014	1	2	2	126	43	1	297	Ki3xOh7B	DRIL38.116	NA	7	5	NA	NA	NA	NA	6
GLS	35136	2014	1	2	2	126	44	1	298	Ki3xOh7B	DRIL38.023	NA	6.5	5.5	NA	NA	NA	NA	6
GLS	35137	2014	1	2	2	126	45	1	299	Ki3xOh7B	DRIL38.195	NA	7	5	NA	NA	NA	NA	6
GLS	35138	2014	1	2	2	126	46	1	300	Ki3xOh7B	DRIL38.045	NA	NA	NA	NA	NA	NA	NA	NA
GLS	35139	2014	1	2	2	126	47	1	301	Ki3xOh7B	DRIL38.090	NA	6.5	4	NA	NA	NA	NA	5.3
GLS	35141	2014	1	2	2	126	49	1	303	Ki3xOh7B	DRIL38.037	NA	7.5	6	NA	NA	NA	NA	6.8
GLS	35142	2014	1	2	2	126	50	1	304	Ki3xOh7B	DRIL38.153	NA	6.5	5	NA	NA	NA	NA	5.8
GLS	35143	2014	1	2	3	126	51	1	305	Ki3xOh7B	DRIL38.150	NA	7	5	NA	NA	NA	NA	6
GLS	35144	2014	1	2	3	126	52	1	306	Ki3xOh7B	DRIL38.127	NA	7	5.5	NA	NA	NA	NA	6.3
GLS	35145	2014	1	2	3	126	53	1	307	Ki3xOh7B	DRIL38.201	NA	7	5	NA	NA	NA	NA	6
GLS	35146	2014	1	2	3	126	54	1	308	Ki3xOh7B	DRIL38.056	NA	6.5	4	NA	NA	NA	NA	5.3
GLS	35149	2014	1	2	3	126	57	1	311	Ki3xOh7B	DRIL38.022	NA	6.5	4	NA	NA	NA	NA	5.3
GLS	35150	2014	1	2	3	126	58	1	312	Ki3xOh7B	DRIL38.066	NA	7.5	6	NA	NA	NA	NA	6.8
GLS	35151	2014	1	2	3	126	59	1	313	Ki3xOh7B	DRIL38.104	NA	6.5	5	NA	NA	NA	NA	5.8
GLS	35152	2014	1	2	3	126	60	1	314	Ki3xOh7B	DRIL38.202	NA	7.5	6.5	NA	NA	NA	NA	7
GLS	35153	2014	1	2	3	127	60	1	315	Ki3xOh7B	DRIL38.177	NA	7	6	NA	NA	NA	NA	6.5
GLS	35155	2014	1	2	3	127	58	1	317	Ki3xOh7B	DRIL38.128	NA	6.5	5	NA	NA	NA	NA	5.8
GLS	35156	2014	1	2	3	127	57	1	318	Ki3xOh7B	DRIL38.169	NA	7	5	NA	NA	NA	NA	6
GLS	35157	2014	1	2	3	127	56	1	319	Ki3xOh7B	DRIL38.157	NA	6.5	4	NA	NA	NA	NA	5.3
GLS	35158	2014	1	2	3	127	55	1	320	Ki3xOh7B	DRIL38.040	NA	6.5	4	NA	NA	NA	NA	5.3
GLS	35160	2014	1	2	3	127	53	1	322	Ki3xOh7B	DRIL38.047	NA	7	5	NA	NA	NA	NA	6
GLS	35161	2014	1	2	3	127	52	1	323	Ki3xOh7B	DRIL38.137	NA	6.5	4	NA	NA	NA	NA	5.3
GLS	35162	2014	1	2	4	127	51	1	324	Ki3xOh7B	DRIL38.110	NA	7	6.5	NA	NA	NA	NA	6.8
GLS	35163	2014	1	2	4	127	50	1	325	Ki3xOh7B	DRIL38.112	NA	7.5	5	NA	NA	NA	NA	6.3
GLS	35164	2014	1	2	4	127	49	1	326	Ki3xOh7B	DRIL38.181	NA	7	5	NA	NA	NA	NA	6
GLS	35169	2014	1	2	4	127	44	1	331	Ki3xOh7B	DRIL38.014	NA	7.5	5.5	NA	NA	NA	NA	6.5
GLS	35170	2014	1	2	4	127	43	1	332	Ki3xOh7B	DRIL38.003	NA	7.5	6	NA	NA	NA	NA	6.8
GLS	35172	2014	1	2	4	127	41	1	334	Ki3xOh7B	DRIL38.008	NA	7	5	NA	NA	NA	NA	6
GLS	35173	2014	1	2	4	127	40	1	335	Ki3xOh7B	DRIL38.220	NA	7	5	NA	NA	NA	NA	6
GLS	35174	2014	1	2	4	127	39	1	336	Ki3xOh7B	DRIL38.016	NA	7.5	5	NA	NA	NA	NA	6.3
GLS	35176	2014	1	2	4	127	37	1	338	Ki3xOh7B	DRIL38.088	NA	7	5	NA	NA	NA	NA	6
GLS	35177	2014	1	2	4	127	36	1	339	Ki3xOh7B	DRIL38.046	NA	7.5	4.5	NA	NA	NA	NA	6
GLS	35178	2014	1	2	4	127	35	1	340	Ki3xOh7B	DRIL38.055	NA	7	5	NA	NA	NA	NA	6
GLS	35179	2014	1	2	4	127	34	1	341	Ki3xOh7B	DRIL38.052	NA	NA	NA	NA	NA	NA	NA	NA
GLS	35180	2014	1	2	4	127	33	1	342	Ki3xOh7B	DRIL38.219	NA	7.5	7	NA	NA	NA	NA	7.3
GLS	35181	2014	1	2	5	127	32	1	343	Ki3xOh7B	DRIL38.015	NA	6.5	5	NA	NA	NA	NA	5.8
GLS	35183	2014	1	2	5	127	30	1	345	Ki3xOh7B	DRIL38.028	NA	7	6	NA	NA	NA	NA	6.5
GLS	35184	2014	1	2	5	127	29	1	346	Ki3xOh7B	DRIL38.041	NA	7	5	NA	NA	NA	NA	6
GLS	35185	2014	1	2	5	127	28	1	347	Ki3xOh7B	DRIL38.033	NA	7.5	4.5	NA	NA	NA	NA	6
GLS	35187	2014	1	2	5	127	26	1	349	Ki3xOh7B	DRIL38.006	NA	7	5	NA	NA	NA	NA	6
GLS	35189	2014	1	2	5	127	24	1	351	Ki3xOh7B	DRIL38.167	NA	7	6	NA	NA	NA	NA	6.5
GLS	35191	2014	1	2	5	127	22	1	353	Ki3xOh7B	DRIL38.021	NA	7	5	NA	NA	NA	NA	6
GLS	35192	2014	1	2	5	127	21	1	354	Ki3xOh7B	DRIL38.081	NA	7	5	NA	NA	NA	NA	6
GLS	35193	2014	1	2	5	127	20	1	355	Ki3xOh7B	DRIL38.074	NA	7	5	NA	NA	NA	NA	6
GLS	35194	2014	1	2	5	127	19	1	356	Ki3xOh7B	DRIL38.146	NA	7	6	NA	NA	NA	NA	6.5
GLS	35195	2014	1	2	5	127	18	1	357	Ki3xOh7B	DRIL38.185	NA	7	5.5	NA	NA	NA	NA	6.3
GLS	35196	2014	1	2	5	127	17	1	358	Ki3xOh7B	DRIL38.232	NA	7	5	NA	NA	NA	NA	6
GLS	35197	2014	1	2	5	127	16	1	359	Ki3xOh7B	DRIL38.118	NA	6.5	5	NA	NA	NA	NA	5.8
GLS	35198	2014	1	2	5	127	15	1	360	Ki3xOh7B	DRIL38.129	NA	NA	NA	NA	NA	NA	NA	NA
GLS	35202	2014	1	2	6	127	11	1	364	Ki3xOh7B	DRIL38.054	NA	7	6	NA	NA	NA	NA	6.5
GLS	35203	2014	1	2	6	127	10	1	365	Ki3xOh7B	DRIL38.075	NA	7.5	6.5	NA	NA	NA	NA	7
GLS	35204	2014	1	2	6	127	9	1	366	Ki3xOh7B	DRIL38.034	NA	7	6	NA	NA	NA	NA	6.5
GLS	35206	2014	1	2	6	127	7	1	368	Ki3xOh7B	DRIL38.126	NA	7	5	NA	NA	NA	NA	6
GLS	35207	2014	1	2	6	127	6	1	369	Ki3xOh7B	DRIL38.203	NA	7	5.5	NA	NA	NA	NA	6.3
GLS	35208	2014	1	2	6	127	5	1	370	Ki3xOh7B	DRIL38.155	NA	7.5	5	NA	NA	NA	NA	6.3
GLS	35210	2014	1	2	6	128	6	1	372	Ki3xOh7B	DRIL38.209	NA	8	7.5	NA	NA	NA	NA	7.8
GLS	35211	2014	1	2	6	128	7	1	373	Ki3xOh7B	DRIL38.226	NA	7.5	6	NA	NA	NA	NA	6.8
GLS	35212	2014	1	2	6	128	8	1	374	Ki3xOh7B	DRIL38.175	NA	7.5	6	NA	NA	NA	NA	6.8
GLS	35213	2014	1	2	6	128	9	1	375	Ki3xOh7B	DRIL38.172	NA	8	7.5	NA	NA	NA	NA	7.8
GLS	35214	2014	1	2	6	128	10	1	376	Ki3xOh7B	DRIL38.011	NA	7.5	6	NA	NA	NA	NA	6.8
GLS	35216	2014	1	2	6	128	12	1	378	Ki3xOh7B	DRIL38.120	NA	7	4	NA	NA	NA	NA	5.5
GLS	35217	2014	1	2	6	128	13	1	379	Ki3xOh7B	DRIL38.070	NA	7.5	6	NA	NA	NA	NA	6.8
GLS	35218	2014	1	2	6	128	14	1	380	Ki3xOh7B	DRIL38.065	NA	7	4	NA	NA	NA	NA	5.5
GLS	35219	2014	1	2	7	128	15	1	381	Ki3xOh7B	DRIL38.025	NA	7.5	6.5	NA	NA	NA	NA	7
GLS	35220	2014	1	2	7	128	16	1	382	Ki3xOh7B	DRIL38.222	NA	NA	NA	NA	NA	NA	NA	NA
GLS	35221	2014	1	2	7	128	17	1	383	Ki3xOh7B	DRIL38.024	NA	NA	NA	NA	NA	NA	NA	NA
GLS	35223	2014	1	2	7	128	19	1	385	Ki3xOh7B	DRIL38.158	NA	7.5	6.5	NA	NA	NA	NA	7
GLS	35224	2014	1	2	7	128	20	1	386	Ki3xOh7B	DRIL38.095	NA	7	5	NA	NA	NA	NA	6
GLS	35225	2014	1	2	7	128	21	1	387	Ki3xOh7B	DRIL38.178	NA	7	5	NA	NA	NA	NA	6
GLS	35226	2014	1	2	7	128	22	1	388	Ki3xOh7B	DRIL38.190	NA	7.5	6.5	NA	NA	NA	NA	7
GLS	35227	2014	1	2	7	128	23	1	389	Ki3xOh7B	DRIL38.043	NA	7	6	NA	NA	NA	NA	6.5
GLS	35229	2014	1	2	7	128	25	1	391	Ki3xOh7B	DRIL38.163	NA	7	5	NA	NA	NA	NA	6
GLS	35230	2014	1	2	7	128	26	1	392	Ki3xOh7B	DRIL38.194	NA	7.5	6	NA	NA	NA	NA	6.8
GLS	35231	2014	1	2	7	128	27	1	393	Ki3xOh7B	DRIL38.218	NA	7	6	NA	NA	NA	NA	6.5
GLS	35232	2014	1	2	7	128	28	1	394	Ki3xOh7B	DRIL38.068	NA	7	5	NA	NA	NA	NA	6
GLS	35233	2014	1	2	7	128	29	1	395	Ki3xOh7B	DRIL38.141	NA	7	5	NA	NA	NA	NA	6
GLS	35234	2014	1	2	7	128	30	1	396	Ki3xOh7B	DRIL38.188	NA	6.5	5	NA	NA	NA	NA	5.8
GLS	35235	2014	1	2	7	128	31	1	397	Ki3xOh7B	DRIL38.029	NA	7	5.5	NA	NA	NA	NA	6.3
GLS	35236	2014	1	2	7	128	32	1	398	Ki3xOh7B	DRIL38.192	NA	8	7.5	NA	NA	NA	NA	7.8
GLS	35237	2014	1	2	7	128	33	1	399	Ki3xOh7B	DRIL38.091	NA	7	5	NA	NA	NA	NA	6
GLS	35238	2014	1	2	8	128	34	1	400	Ki3xOh7B	DRIL38.154	NA	6.5	4	NA	NA	NA	NA	5.3
GLS	35239	2014	1	2	8	128	35	1	401	Ki3xOh7B	DRIL38.198	NA	7	5	NA	NA	NA	NA	6
GLS	35240	2014	1	2	8	128	36	1	402	Ki3xOh7B	DRIL38.199	NA	7.5	6	NA	NA	NA	NA	6.8
GLS	35241	2014	1	2	8	128	37	1	403	Ki3xOh7B	DRIL38.193	NA	7	5	NA	NA	NA	NA	6
GLS	35243	2014	1	2	8	128	39	1	405	Ki3xOh7B	DRIL38.079	NA	7	5	NA	NA	NA	NA	6
GLS	35246	2014	1	2	8	128	42	1	408	Ki3xOh7B	DRIL38.166	NA	7	5	NA	NA	NA	NA	6
GLS	35247	2014	1	2	8	128	43	1	409	Ki3xOh7B	DRIL38.214	NA	7.5	5	NA	NA	NA	NA	6.3
GLS	35248	2014	1	2	8	128	44	1	410	Ki3xOh7B	DRIL38.083	NA	7	5.5	NA	NA	NA	NA	6.3
GLS	35249	2014	1	2	8	128	45	1	411	Ki3xOh7B	DRIL38.044	NA	6.5	5	NA	NA	NA	NA	5.8
GLS	35251	2014	1	2	8	128	47	1	413	Ki3xOh7B	DRIL38.170	NA	8.5	8	NA	NA	NA	NA	8.3
GLS	35252	2014	1	2	8	128	48	1	414	Ki3xOh7B	DRIL38.053	NA	7	6	NA	NA	NA	NA	6.5
GLS	35253	2014	1	2	8	128	49	1	415	Ki3xOh7B	DRIL38.115	NA	7	5	NA	NA	NA	NA	6
GLS	35254	2014	1	2	8	128	50	1	416	Ki3xOh7B	DRIL38.216	NA	7	4	NA	NA	NA	NA	5.5
GLS	35257	2014	1	2	9	128	53	1	419	Ki3xOh7B	DRIL38.048	NA	6	4	NA	NA	NA	NA	5
GLS	35258	2014	1	2	9	128	54	1	420	Ki3xOh7B	DRIL38.186	NA	7	5	NA	NA	NA	NA	6
GLS	35259	2014	1	2	9	128	55	1	421	Ki3xOh7B	DRIL38.036	NA	7	5	NA	NA	NA	NA	6
GLS	35260	2014	1	2	9	128	56	1	422	Ki3xOh7B	DRIL38.009	NA	NA	NA	NA	NA	NA	NA	NA
GLS	35261	2014	1	2	9	128	57	1	423	Ki3xOh7B	DRIL38.189	NA	6.5	5	NA	NA	NA	NA	5.8
GLS	35262	2014	1	2	9	128	58	1	424	Ki3xOh7B	DRIL38.061	NA	7	5	NA	NA	NA	NA	6
GLS	35265	2014	1	2	9	129	60	1	427	Ki3xOh7B	DRIL38.231	NA	7	5.5	NA	NA	NA	NA	6.3
GLS	35266	2014	1	2	9	129	59	1	428	Ki3xOh7B	DRIL38.097	NA	6.5	5	NA	NA	NA	NA	5.8
GLS	35267	2014	1	2	9	129	58	1	429	Ki3xOh7B	DRIL38.229	NA	6.5	4	NA	NA	NA	NA	5.3
GLS	35270	2014	1	2	9	129	55	1	432	Ki3xOh7B	DRIL38.211	NA	NA	NA	NA	NA	NA	NA	NA
GLS	35271	2014	1	2	9	129	54	1	433	Ki3xOh7B	DRIL38.096	NA	7	6.5	NA	NA	NA	NA	6.8
GLS	35272	2014	1	2	9	129	53	1	434	Ki3xOh7B	DRIL38.132	NA	7	5	NA	NA	NA	NA	6
GLS	35273	2014	1	2	9	129	52	1	435	Ki3xOh7B	DRIL38.109	NA	7	5	NA	NA	NA	NA	6
GLS	35274	2014	1	2	9	129	51	1	436	Ki3xOh7B	DRIL38.159	NA	7	6	NA	NA	NA	NA	6.5
GLS	35275	2014	1	2	9	129	50	1	437	Ki3xOh7B	DRIL38.148	NA	7.5	6.5	NA	NA	NA	NA	7
GLS	35276	2014	1	2	10	129	49	1	438	Ki3xOh7B	DRIL38.073	NA	7	6	NA	NA	NA	NA	6.5
GLS	35277	2014	1	2	10	129	48	1	439	Ki3xOh7B	DRIL38.063	NA	6.5	5	NA	NA	NA	NA	5.8
GLS	35278	2014	1	2	10	129	47	1	440	Ki3xOh7B	DRIL38.152	NA	7.5	5	NA	NA	NA	NA	6.3
GLS	35279	2014	1	2	10	129	46	1	441	Ki3xOh7B	DRIL38.020	NA	7.5	6	NA	NA	NA	NA	6.8
GLS	35280	2014	1	2	10	129	45	1	442	Ki3xOh7B	DRIL38.031	NA	7	5.5	NA	NA	NA	NA	6.3
GLS	35281	2014	1	2	10	129	44	1	443	Ki3xOh7B	DRIL38.143	NA	7.5	6	NA	NA	NA	NA	6.8
GLS	35282	2014	1	2	10	129	43	1	444	Ki3xOh7B	DRIL38.151	NA	7	5	NA	NA	NA	NA	6
GLS	35285	2014	1	2	10	129	40	1	447	Ki3xOh7B	DRIL38.139	NA	7	6	NA	NA	NA	NA	6.5
GLS	35286	2014	1	2	10	129	39	1	448	Ki3xOh7B	DRIL38.093	NA	7	5	NA	NA	NA	NA	6
GLS	35287	2014	1	2	10	129	38	1	449	Ki3xOh7B	DRIL38.176	NA	8	6	NA	NA	NA	NA	7
GLS	35289	2014	1	2	10	129	36	1	451	Ki3xOh7B	DRIL38.160	NA	7.5	7	NA	NA	NA	NA	7.3
GLS	35290	2014	1	2	10	129	35	1	452	Ki3xOh7B	DRIL38.197	NA	7.5	6.5	NA	NA	NA	NA	7
GLS	35291	2014	1	2	10	129	34	1	453	Ki3xOh7B	DRIL38.101	NA	6	4	NA	NA	NA	NA	5
GLS	35292	2014	1	2	10	129	33	1	454	Ki3xOh7B	DRIL38.038	NA	7	5	NA	NA	NA	NA	6
GLS	35293	2014	1	2	10	129	32	1	455	Ki3xOh7B	DRIL38.180	NA	7.5	5	NA	NA	NA	NA	6.3
GLS	35294	2014	1	2	10	129	31	1	456	Ki3xOh7B	DRIL38.187	NA	NA	NA	NA	NA	NA	NA	NA
GLS	35295	2014	1	2	11	129	30	1	457	Ki3xOh7B	DRIL38.191	NA	7	4	NA	NA	NA	NA	5.5
GLS	35296	2014	1	2	11	129	29	1	458	Ki3xOh7B	DRIL38.114	NA	6.5	5	NA	NA	NA	NA	5.8
GLS	35297	2014	1	2	11	129	28	1	459	Ki3xOh7B	DRIL38.076	NA	7	5.5	NA	NA	NA	NA	6.3
GLS	35298	2014	1	2	11	129	27	1	460	Ki3xOh7B	DRIL38.078	NA	NA	NA	NA	NA	NA	NA	NA
GLS	35299	2014	1	2	11	129	26	1	461	Ki3xOh7B	DRIL38.050	NA	7.5	6.5	NA	NA	NA	NA	7
GLS	35300	2014	1	2	11	129	25	1	462	Ki3xOh7B	DRIL38.001	NA	7.5	6.5	NA	NA	NA	NA	7
GLS	35303	2014	1	2	11	129	22	1	465	Ki3xOh7B	DRIL38.227	NA	6.5	5	NA	NA	NA	NA	5.8
GLS	35304	2014	1	2	11	129	21	1	466	Ki3xOh7B	DRIL38.224	NA	7	4	NA	NA	NA	NA	5.5
GLS	35305	2014	1	2	11	129	20	1	467	Ki3xOh7B	DRIL38.094	NA	7.5	6.5	NA	NA	NA	NA	7
GLS	35306	2014	1	2	11	129	19	1	468	Ki3xOh7B	DRIL38.147	NA	7.5	6	NA	NA	NA	NA	6.8
GLS	35308	2014	1	2	11	129	17	1	470	Ki3xOh7B	DRIL38.210	NA	7.5	6	NA	NA	NA	NA	6.8
GLS	35309	2014	1	2	11	129	16	1	471	Ki3xOh7B	DRIL38.113	NA	7.5	6	NA	NA	NA	NA	6.8
GLS	35310	2014	1	2	11	129	15	1	472	Ki3xOh7B	DRIL38.082	NA	7.5	6.5	NA	NA	NA	NA	7
GLS	35312	2014	1	2	11	129	13	1	474	Ki3xOh7B	DRIL38.168	NA	7.5	6	NA	NA	NA	NA	6.8
GLS	35313	2014	1	2	11	129	12	1	475	Ki3xOh7B	DRIL38.032	NA	7.5	6	NA	NA	NA	NA	6.8
GLS	35315	2014	1	2	12	129	10	1	477	Ki3xOh7B	DRIL38.136	NA	7	6	NA	NA	NA	NA	6.5
GLS	35316	2014	1	2	12	129	9	1	478	Ki3xOh7B	DRIL38.107	NA	6.5	6	NA	NA	NA	NA	6.3
GLS	35317	2014	1	2	12	129	8	1	479	Ki3xOh7B	DRIL38.051	NA	7.5	6.5	NA	NA	NA	NA	7
GLS	35318	2014	1	2	12	129	7	1	480	Ki3xOh7B	DRIL38.080	NA	7.5	7.5	NA	NA	NA	NA	7.5
GLS	35320	2014	1	2	12	129	5	1	482	Ki3xOh7B	DRIL38.012	NA	8	6.5	NA	NA	NA	NA	7.3
GLS	35321	2014	1	2	12	130	5	1	483	Ki3xOh7B	DRIL38.179	NA	7.5	7	NA	NA	NA	NA	7.3
GLS	35322	2014	1	2	12	130	6	1	484	Ki3xOh7B	DRIL38.207	NA	7	6	NA	NA	NA	NA	6.5
GLS	35325	2014	1	2	12	130	9	1	487	Ki3xOh7B	DRIL38.059	NA	7.5	7	NA	NA	NA	NA	7.3
GLS	35326	2014	1	2	12	130	10	1	488	Ki3xOh7B	DRIL38.125	NA	7.5	6.5	NA	NA	NA	NA	7
GLS	35327	2014	1	2	12	130	11	1	489	Ki3xOh7B	DRIL38.062	NA	7	6	NA	NA	NA	NA	6.5
GLS	35328	2014	1	2	12	130	12	1	490	Ki3xOh7B	DRIL38.205	NA	7	5	NA	NA	NA	NA	6
GLS	35330	2014	1	2	12	130	14	1	492	Ki3xOh7B	DRIL38.026	NA	7.5	5	NA	NA	NA	NA	6.3
GLS	35331	2014	1	2	12	130	15	1	493	Ki3xOh7B	DRIL38.072	NA	8	6.5	NA	NA	NA	NA	7.3
GLS	35333	2014	1	2	13	130	17	1	495	Ki3xOh7B	DRIL38.105	NA	7	6	NA	NA	NA	NA	6.5
GLS	35334	2014	1	2	13	130	18	1	496	Ki3xOh7B	DRIL38.171	NA	7	6	NA	NA	NA	NA	6.5
GLS	35335	2014	1	2	13	130	19	1	497	Ki3xOh7B	DRIL38.144	NA	7	5.5	NA	NA	NA	NA	6.3
GLS	35337	2014	1	2	13	130	21	1	499	Ki3xOh7B	DRIL38.196	NA	7	6	NA	NA	NA	NA	6.5
GLS	35338	2014	1	2	13	130	22	1	500	Ki3xOh7B	DRIL38.133	NA	7.5	6.5	NA	NA	NA	NA	7
GLS	35339	2014	1	2	13	130	23	1	501	Ki3xOh7B	DRIL38.142	NA	6.5	5	NA	NA	NA	NA	5.8
GLS	35340	2014	1	2	13	130	24	1	502	Ki3xOh7B	DRIL38.103	NA	7	5	NA	NA	NA	NA	6
GLS	35343	2014	1	2	13	130	27	1	505	Ki3xOh7B	DRIL38.223	NA	7	5	NA	NA	NA	NA	6
GLS	35344	2014	1	2	13	130	28	1	506	Ki3xOh7B	DRIL38.217	NA	7	5.5	NA	NA	NA	NA	6.3
GLS	35347	2014	1	2	13	130	31	1	509	Ki3xOh7B	DRIL38.010	NA	7.5	5	NA	NA	NA	NA	6.3
GLS	35349	2014	1	2	13	130	33	1	511	Ki3xOh7B	DRIL38.017	NA	7.5	5.5	NA	NA	NA	NA	6.5
GLS	35350	2014	1	2	13	130	34	1	512	Ki3xOh7B	DRIL38.138	NA	6.5	5	NA	NA	NA	NA	5.8
GLS	35351	2014	1	2	13	130	35	1	513	Ki3xOh7B	DRIL38.134	NA	6	5	NA	NA	NA	NA	5.5
GLS	35352	2014	1	2	14	130	36	1	514	Ki3xOh7B	DRIL38.077	NA	7	5.5	NA	NA	NA	NA	6.3
GLS	35353	2014	1	2	14	130	37	1	515	Ki3xOh7B	DRIL38.049	NA	NA	NA	NA	NA	NA	NA	NA
GLS	35356	2014	1	2	14	130	40	1	518	Ki3xOh7B	DRIL38.057	NA	6.5	5	NA	NA	NA	NA	5.8
GLS	35358	2014	1	2	14	130	42	1	520	Ki3xOh7B	DRIL38.004	NA	7	5.5	NA	NA	NA	NA	6.3
GLS	35359	2014	1	2	14	130	43	1	521	Ki3xOh7B	DRIL38.119	NA	NA	NA	NA	NA	NA	NA	NA
GLS	35360	2014	1	2	14	130	44	1	522	Ki3xOh7B	DRIL38.085	NA	7	5	NA	NA	NA	NA	6
GLS	35361	2014	1	2	14	130	45	1	523	Ki3xOh7B	DRIL38.018	NA	6.5	5	NA	NA	NA	NA	5.8
GLS	35363	2014	1	2	14	130	47	1	525	Ki3xOh7B	DRIL38.007	NA	7	5.5	NA	NA	NA	NA	6.3
GLS	35364	2014	1	2	14	130	48	1	526	Ki3xOh7B	DRIL38.221	NA	7	4	NA	NA	NA	NA	5.5
GLS	35365	2014	1	2	14	130	49	1	527	Ki3xOh7B	DRIL38.058	NA	7	5	NA	NA	NA	NA	6
GLS	35366	2014	1	2	14	130	50	1	528	Ki3xOh7B	DRIL38.019	NA	NA	NA	NA	NA	NA	NA	NA
GLS	35367	2014	1	2	14	130	51	1	529	Ki3xOh7B	DRIL38.208	NA	7.5	6	NA	NA	NA	NA	6.8
GLS	35368	2014	1	2	14	130	52	1	530	Ki3xOh7B	DRIL38.162	NA	7	6	NA	NA	NA	NA	6.5
GLS	35369	2014	1	2	14	130	53	1	531	Ki3xOh7B	DRIL38.035	NA	6.5	5	NA	NA	NA	NA	5.8
GLS	50001	2015	1	1	1	3	1	1	1	Ki3xOh7B	DRIL38.231	NA	7.5	6.5	NA	NA	NA	NA	7
GLS	50002	2015	1	1	1	3	2	1	2	Ki3xOh7B	DRIL38.137	NA	7	6.5	NA	NA	NA	NA	6.8
GLS	50005	2015	1	1	1	3	5	1	5	Ki3xOh7B	DRIL38.081	NA	6.5	5	NA	NA	NA	NA	5.8
GLS	50007	2015	1	1	1	3	7	1	7	Ki3xOh7B	DRIL38.025	NA	7.5	6.5	NA	NA	NA	NA	7
GLS	50009	2015	1	1	1	3	9	1	9	Ki3xOh7B	DRIL38.008	NA	6	4	NA	NA	NA	NA	5
GLS	50010	2015	1	1	1	3	10	1	10	Ki3xOh7B	DRIL38.053	NA	6	4	NA	NA	NA	NA	5
GLS	50011	2015	1	1	1	3	11	1	11	Ki3xOh7B	DRIL38.091	NA	7.5	6	NA	NA	NA	NA	6.8
GLS	50013	2015	1	1	1	3	13	1	13	Ki3xOh7B	DRIL38.044	NA	6	4	NA	NA	NA	NA	5
GLS	50015	2015	1	1	1	3	15	1	15	Ki3xOh7B	DRIL38.169	NA	6	4.5	NA	NA	NA	NA	5.3
GLS	50017	2015	1	1	1	3	17	1	17	Ki3xOh7B	DRIL38.040	NA	7	6.5	NA	NA	NA	NA	6.8
GLS	50018	2015	1	1	1	3	18	1	18	Ki3xOh7B	DRIL38.178	NA	7	6.5	NA	NA	NA	NA	6.8
GLS	50019	2015	1	1	1	3	19	1	19	Ki3xOh7B	DRIL38.230	NA	7.5	6.5	NA	NA	NA	NA	7
GLS	50020	2015	1	1	2	3	20	1	20	Ki3xOh7B	DRIL38.154	NA	5.5	4	NA	NA	NA	NA	4.8
GLS	50021	2015	1	1	2	3	21	1	21	Ki3xOh7B	DRIL38.036	NA	6.5	4	NA	NA	NA	NA	5.3
GLS	50022	2015	1	1	2	3	22	1	22	Ki3xOh7B	DRIL38.058	NA	7	5	NA	NA	NA	NA	6
GLS	50023	2015	1	1	2	3	23	1	23	Ki3xOh7B	DRIL38.068	NA	7	5.5	NA	NA	NA	NA	6.3
GLS	50025	2015	1	1	2	3	25	1	25	Ki3xOh7B	DRIL38.166	NA	5.5	4	NA	NA	NA	NA	4.8
GLS	50026	2015	1	1	2	3	26	1	26	Ki3xOh7B	DRIL38.103	NA	6.5	4	NA	NA	NA	NA	5.3
GLS	50027	2015	1	1	2	3	27	1	27	Ki3xOh7B	DRIL38.006	NA	7	6.5	NA	NA	NA	NA	6.8
GLS	50028	2015	1	1	2	3	28	1	28	Ki3xOh7B	DRIL38.048	NA	5.5	3	NA	NA	NA	NA	4.3
GLS	50030	2015	1	1	2	3	30	1	30	Ki3xOh7B	DRIL38.074	NA	6.5	4	NA	NA	NA	NA	5.3
GLS	50031	2015	1	1	2	3	31	1	31	Ki3xOh7B	DRIL38.041	NA	7.5	6.5	NA	NA	NA	NA	7
GLS	50032	2015	1	1	2	3	32	1	32	Ki3xOh7B	DRIL38.080	NA	6.5	5.5	NA	NA	NA	NA	6
GLS	50034	2015	1	1	2	3	34	1	34	Ki3xOh7B	DRIL38.202	NA	7	6	NA	NA	NA	NA	6.5
GLS	50035	2015	1	1	2	4	34	1	35	Ki3xOh7B	DRIL38.119	NA	7	6	NA	NA	NA	NA	6.5
GLS	50036	2015	1	1	2	4	33	1	36	Ki3xOh7B	DRIL38.089	NA	6.5	5.5	NA	NA	NA	NA	6
GLS	50037	2015	1	1	2	4	32	1	37	Ki3xOh7B	DRIL38.146	NA	7.5	7	NA	NA	NA	NA	7.3
GLS	50039	2015	1	1	3	4	30	1	39	Ki3xOh7B	DRIL38.134	NA	6.5	5.5	NA	NA	NA	NA	6
GLS	50041	2015	1	1	3	4	28	1	41	Ki3xOh7B	DRIL38.228	NA	7.5	6.5	NA	NA	NA	NA	7
GLS	50042	2015	1	1	3	4	27	1	42	Ki3xOh7B	DRIL38.131	NA	7	5	NA	NA	NA	NA	6
GLS	50043	2015	1	1	3	4	26	1	43	Ki3xOh7B	DRIL38.167	NA	7	5	NA	NA	NA	NA	6
GLS	50044	2015	1	1	3	4	25	1	44	Ki3xOh7B	DRIL38.226	NA	6.5	5	NA	NA	NA	NA	5.8
GLS	50045	2015	1	1	3	4	24	1	45	Ki3xOh7B	DRIL38.028	NA	7	5.5	NA	NA	NA	NA	6.3
GLS	50047	2015	1	1	3	4	22	1	47	Ki3xOh7B	DRIL38.020	NA	7.5	6	NA	NA	NA	NA	6.8
GLS	50050	2015	1	1	3	4	19	1	50	Ki3xOh7B	DRIL38.138	NA	6.5	4.5	NA	NA	NA	NA	5.5
GLS	50052	2015	1	1	3	4	17	1	52	Ki3xOh7B	DRIL38.038	NA	5	4	NA	NA	NA	NA	4.5
GLS	50053	2015	1	1	3	4	16	1	53	Ki3xOh7B	DRIL38.184	NA	6.5	5.5	NA	NA	NA	NA	6
GLS	50054	2015	1	1	3	4	15	1	54	Ki3xOh7B	DRIL38.114	NA	7.5	7	NA	NA	NA	NA	7.3
GLS	50055	2015	1	1	3	4	14	1	55	Ki3xOh7B	DRIL38.071	NA	7	6	NA	NA	NA	NA	6.5
GLS	50056	2015	1	1	3	4	13	1	56	Ki3xOh7B	DRIL38.035	NA	7	6.5	NA	NA	NA	NA	6.8
GLS	50057	2015	1	1	3	4	12	1	57	Ki3xOh7B	DRIL38.143	NA	7.5	7	NA	NA	NA	NA	7.3
GLS	50058	2015	1	1	4	4	11	1	58	Ki3xOh7B	DRIL38.189	NA	6.5	4	NA	NA	NA	NA	5.3
GLS	50059	2015	1	1	4	4	10	1	59	Ki3xOh7B	DRIL38.123	NA	7.5	6	NA	NA	NA	NA	6.8
GLS	50060	2015	1	1	4	4	9	1	60	Ki3xOh7B	DRIL38.201	NA	7.5	7	NA	NA	NA	NA	7.3
GLS	50061	2015	1	1	4	4	8	1	61	Ki3xOh7B	DRIL38.214	NA	7.5	6.5	NA	NA	NA	NA	7
GLS	50062	2015	1	1	4	4	7	1	62	Ki3xOh7B	DRIL38.009	NA	7	6.5	NA	NA	NA	NA	6.8
GLS	50063	2015	1	1	4	4	6	1	63	Ki3xOh7B	DRIL38.207	NA	7.5	6	NA	NA	NA	NA	6.8
GLS	50064	2015	1	1	4	4	5	1	64	Ki3xOh7B	DRIL38.037	NA	7.5	7	NA	NA	NA	NA	7.3
GLS	50066	2015	1	1	4	4	3	1	66	Ki3xOh7B	DRIL38.185	NA	NA	NA	NA	NA	NA	NA	NA
GLS	50067	2015	1	1	4	4	2	1	67	Ki3xOh7B	DRIL38.051	NA	NA	NA	NA	NA	NA	NA	NA
GLS	50068	2015	1	1	4	4	1	1	68	Ki3xOh7B	DRIL38.063	NA	NA	NA	NA	NA	NA	NA	NA
GLS	50069	2015	1	1	4	5	1	1	69	Ki3xOh7B	DRIL38.065	NA	NA	NA	NA	NA	NA	NA	NA
GLS	50070	2015	1	1	4	5	2	1	70	Ki3xOh7B	DRIL38.086	NA	NA	NA	NA	NA	NA	NA	NA
GLS	50071	2015	1	1	4	5	3	1	71	Ki3xOh7B	DRIL38.052	NA	NA	NA	NA	NA	NA	NA	NA
GLS	50072	2015	1	1	4	5	4	1	72	Ki3xOh7B	DRIL38.163	NA	7	5.5	NA	NA	NA	NA	6.3
GLS	50073	2015	1	1	4	5	5	1	73	Ki3xOh7B	DRIL38.011	NA	7	5.5	NA	NA	NA	NA	6.3
GLS	50074	2015	1	1	4	5	6	1	74	Ki3xOh7B	DRIL38.049	NA	NA	NA	NA	NA	NA	NA	NA
GLS	50077	2015	1	1	5	5	9	1	77	Ki3xOh7B	DRIL38.031	NA	6	4	NA	NA	NA	NA	5
GLS	50079	2015	1	1	5	5	11	1	79	Ki3xOh7B	DRIL38.220	NA	7.5	6.5	NA	NA	NA	NA	7
GLS	50080	2015	1	1	5	5	12	1	80	Ki3xOh7B	DRIL38.196	NA	7.5	6	NA	NA	NA	NA	6.8
GLS	50081	2015	1	1	5	5	13	1	81	Ki3xOh7B	DRIL38.187	NA	7.5	6.5	NA	NA	NA	NA	7
GLS	50082	2015	1	1	5	5	14	1	82	Ki3xOh7B	DRIL38.027	NA	7	6	NA	NA	NA	NA	6.5
GLS	50083	2015	1	1	5	5	15	1	83	Ki3xOh7B	DRIL38.120	NA	NA	NA	NA	NA	NA	NA	NA
GLS	50084	2015	1	1	5	5	16	1	84	Ki3xOh7B	DRIL38.112	NA	6.5	4.5	NA	NA	NA	NA	5.5
GLS	50085	2015	1	1	5	5	17	1	85	Ki3xOh7B	DRIL38.141	NA	7	5.5	NA	NA	NA	NA	6.3
GLS	50086	2015	1	1	5	5	18	1	86	Ki3xOh7B	DRIL38.229	NA	6.5	4	NA	NA	NA	NA	5.3
GLS	50087	2015	1	1	5	5	19	1	87	Ki3xOh7B	DRIL38.057	NA	7	4	NA	NA	NA	NA	5.5
GLS	50088	2015	1	1	5	5	20	1	88	Ki3xOh7B	DRIL38.003	NA	7.5	6.5	NA	NA	NA	NA	7
GLS	50090	2015	1	1	5	5	22	1	90	Ki3xOh7B	DRIL38.007	NA	7.5	6	NA	NA	NA	NA	6.8
GLS	50091	2015	1	1	5	5	23	1	91	Ki3xOh7B	DRIL38.104	NA	6.5	5	NA	NA	NA	NA	5.8
GLS	50092	2015	1	1	5	5	24	1	92	Ki3xOh7B	DRIL38.168	NA	7.5	6.5	NA	NA	NA	NA	7
GLS	50094	2015	1	1	5	5	26	1	94	Ki3xOh7B	DRIL38.160	NA	7	6.5	NA	NA	NA	NA	6.8
GLS	50095	2015	1	1	5	5	27	1	95	Ki3xOh7B	DRIL38.186	NA	7.5	6	NA	NA	NA	NA	6.8
GLS	50096	2015	1	1	6	5	28	1	96	Ki3xOh7B	DRIL38.096	NA	7.5	6	NA	NA	NA	NA	6.8
GLS	50097	2015	1	1	6	5	29	1	97	Ki3xOh7B	DRIL38.219	NA	8.5	7.5	NA	NA	NA	NA	8
GLS	50098	2015	1	1	6	5	30	1	98	Ki3xOh7B	DRIL38.133	NA	7.5	6.5	NA	NA	NA	NA	7
GLS	50103	2015	1	1	6	6	34	1	103	Ki3xOh7B	DRIL38.144	NA	NA	NA	NA	NA	NA	NA	NA
GLS	50104	2015	1	1	6	6	33	1	104	Ki3xOh7B	DRIL38.159	NA	7.5	6.5	NA	NA	NA	NA	7
GLS	50105	2015	1	1	6	6	32	1	105	Ki3xOh7B	DRIL38.130	NA	7	4	NA	NA	NA	NA	5.5
GLS	50106	2015	1	1	6	6	31	1	106	Ki3xOh7B	DRIL38.183	NA	7.5	5.5	NA	NA	NA	NA	6.5
GLS	50107	2015	1	1	6	6	30	1	107	Ki3xOh7B	DRIL38.030	NA	NA	NA	NA	NA	NA	NA	NA
GLS	50108	2015	1	1	6	6	29	1	108	Ki3xOh7B	DRIL38.082	NA	7	5	NA	NA	NA	NA	6
GLS	50109	2015	1	1	6	6	28	1	109	Ki3xOh7B	DRIL38.116	NA	7.5	5	NA	NA	NA	NA	6.3
GLS	50110	2015	1	1	6	6	27	1	110	Ki3xOh7B	DRIL38.153	NA	6	4	NA	NA	NA	NA	5
GLS	50111	2015	1	1	6	6	26	1	111	Ki3xOh7B	DRIL38.171	NA	6.5	4	NA	NA	NA	NA	5.3
GLS	50113	2015	1	1	6	6	24	1	113	Ki3xOh7B	DRIL38.022	NA	6.5	6	NA	NA	NA	NA	6.3
GLS	50114	2015	1	1	6	6	23	1	114	Ki3xOh7B	DRIL38.019	NA	7	5	NA	NA	NA	NA	6
GLS	50117	2015	1	1	7	6	21	1	116	Ki3xOh7B	DRIL38.076	NA	7.5	6	NA	NA	NA	NA	6.8
GLS	50118	2015	1	1	7	6	20	1	117	Ki3xOh7B	DRIL38.107	NA	8	7	NA	NA	NA	NA	7.5
GLS	50119	2015	1	1	7	6	19	1	118	Ki3xOh7B	DRIL38.205	NA	7.5	6.5	NA	NA	NA	NA	7
GLS	50120	2015	1	1	7	6	18	1	119	Ki3xOh7B	DRIL38.050	NA	7	6	NA	NA	NA	NA	6.5
GLS	50121	2015	1	1	7	6	17	1	120	Ki3xOh7B	DRIL38.072	NA	7	5	NA	NA	NA	NA	6
GLS	50122	2015	1	1	7	6	16	1	121	Ki3xOh7B	DRIL38.043	NA	NA	NA	NA	NA	NA	NA	NA
GLS	50124	2015	1	1	7	6	14	1	123	Ki3xOh7B	DRIL38.152	NA	7.5	6.5	NA	NA	NA	NA	7
GLS	50125	2015	1	1	7	6	13	1	124	Ki3xOh7B	DRIL38.033	NA	5	3	NA	NA	NA	NA	4
GLS	50127	2015	1	1	7	6	11	1	126	Ki3xOh7B	DRIL38.128	NA	7	5	NA	NA	NA	NA	6
GLS	50129	2015	1	1	7	6	9	1	128	Ki3xOh7B	DRIL38.062	NA	7.5	7	NA	NA	NA	NA	7.3
GLS	50131	2015	1	1	7	6	7	1	130	Ki3xOh7B	DRIL38.155	NA	6.5	4	NA	NA	NA	NA	5.3
GLS	50132	2015	1	1	7	6	6	1	131	Ki3xOh7B	DRIL38.070	NA	7	6	NA	NA	NA	NA	6.5
GLS	50134	2015	1	1	7	6	4	1	133	Ki3xOh7B	DRIL38.136	NA	NA	NA	NA	NA	NA	NA	NA
GLS	50135	2015	1	1	8	6	3	1	134	Ki3xOh7B	DRIL38.117	NA	7	6	NA	NA	NA	NA	6.5
GLS	50136	2015	1	1	8	6	2	1	135	Ki3xOh7B	DRIL38.066	NA	7.5	6	NA	NA	NA	NA	6.8
GLS	50138	2015	1	1	8	7	1	1	137	Ki3xOh7B	DRIL38.106	NA	7.5	6.5	NA	NA	NA	NA	7
GLS	50139	2015	1	1	8	7	2	1	138	Ki3xOh7B	DRIL38.127	NA	NA	NA	NA	NA	NA	NA	NA
GLS	50140	2015	1	1	8	7	3	1	139	Ki3xOh7B	DRIL38.032	NA	7.5	7	NA	NA	NA	NA	7.3
GLS	50141	2015	1	1	8	7	4	1	140	Ki3xOh7B	DRIL38.157	NA	7.5	6	NA	NA	NA	NA	6.8
GLS	50143	2015	1	1	8	7	6	1	142	Ki3xOh7B	DRIL38.217	NA	7.5	6	NA	NA	NA	NA	6.8
GLS	50144	2015	1	1	8	7	7	1	143	Ki3xOh7B	DRIL38.193	NA	7	6	NA	NA	NA	NA	6.5
GLS	50145	2015	1	1	8	7	8	1	144	Ki3xOh7B	DRIL38.126	NA	7	5.5	NA	NA	NA	NA	6.3
GLS	50146	2015	1	1	8	7	9	1	145	Ki3xOh7B	DRIL38.001	NA	7.5	6.5	NA	NA	NA	NA	7
GLS	50147	2015	1	1	8	7	10	1	146	Ki3xOh7B	DRIL38.145	NA	7.5	6	NA	NA	NA	NA	6.8
GLS	50149	2015	1	1	8	7	12	1	148	Ki3xOh7B	DRIL38.151	NA	NA	NA	NA	NA	NA	NA	NA
GLS	50150	2015	1	1	8	7	13	1	149	Ki3xOh7B	DRIL38.095	NA	7	5	NA	NA	NA	NA	6
GLS	50151	2015	1	1	8	7	14	1	150	Ki3xOh7B	DRIL38.118	NA	NA	NA	NA	NA	NA	NA	NA
GLS	50152	2015	1	1	8	7	15	1	151	Ki3xOh7B	DRIL38.188	NA	7	5	NA	NA	NA	NA	6
GLS	50153	2015	1	1	8	7	16	1	152	Ki3xOh7B	DRIL38.115	NA	7.5	6	NA	NA	NA	NA	6.8
GLS	50154	2015	1	1	9	7	17	1	153	Ki3xOh7B	DRIL38.085	NA	6.5	5	NA	NA	NA	NA	5.8
GLS	50155	2015	1	1	9	7	18	1	154	Ki3xOh7B	DRIL38.061	NA	7	5	NA	NA	NA	NA	6
GLS	50156	2015	1	1	9	7	19	1	155	Ki3xOh7B	DRIL38.059	NA	7	5	NA	NA	NA	NA	6
GLS	50157	2015	1	1	9	7	20	1	156	Ki3xOh7B	DRIL38.073	NA	7	5.5	NA	NA	NA	NA	6.3
GLS	50158	2015	1	1	9	7	21	1	157	Ki3xOh7B	DRIL38.179	NA	7	5	NA	NA	NA	NA	6
GLS	50160	2015	1	1	9	7	23	1	159	Ki3xOh7B	DRIL38.181	NA	5	3	NA	NA	NA	NA	4
GLS	50161	2015	1	1	9	7	24	1	160	Ki3xOh7B	DRIL38.014	NA	6	5	NA	NA	NA	NA	5.5
GLS	50162	2015	1	1	9	7	25	1	161	Ki3xOh7B	DRIL38.004	NA	6	4	NA	NA	NA	NA	5
GLS	50165	2015	1	1	9	7	28	1	164	Ki3xOh7B	DRIL38.060	NA	7.5	6	NA	NA	NA	NA	6.8
GLS	50166	2015	1	1	9	7	29	1	165	Ki3xOh7B	DRIL38.148	NA	6	5	NA	NA	NA	NA	5.5
GLS	50167	2015	1	1	9	7	30	1	166	Ki3xOh7B	DRIL38.108	NA	7.5	6	NA	NA	NA	NA	6.8
GLS	50168	2015	1	1	9	7	31	1	167	Ki3xOh7B	DRIL38.075	NA	7	5.5	NA	NA	NA	NA	6.3
GLS	50169	2015	1	1	9	7	32	1	168	Ki3xOh7B	DRIL38.079	NA	7.5	6	NA	NA	NA	NA	6.8
GLS	50170	2015	1	1	9	7	33	1	169	Ki3xOh7B	DRIL38.078	NA	7	5.5	NA	NA	NA	NA	6.3
GLS	50171	2015	1	1	9	7	34	1	170	Ki3xOh7B	DRIL38.150	NA	NA	NA	NA	NA	NA	NA	NA
GLS	50172	2015	1	1	9	8	34	1	171	Ki3xOh7B	DRIL38.225	NA	7.5	6.5	NA	NA	NA	NA	7
GLS	50173	2015	1	1	10	8	33	1	172	Ki3xOh7B	DRIL38.067	NA	7.5	6.5	NA	NA	NA	NA	7
GLS	50174	2015	1	1	10	8	32	1	173	Ki3xOh7B	DRIL38.088	NA	7	5	NA	NA	NA	NA	6
GLS	50176	2015	1	1	10	8	30	1	175	Ki3xOh7B	DRIL38.221	NA	NA	NA	NA	NA	NA	NA	NA
GLS	50178	2015	1	1	10	8	28	1	177	Ki3xOh7B	DRIL38.218	NA	7	6	NA	NA	NA	NA	6.5
GLS	50179	2015	1	1	10	8	27	1	178	Ki3xOh7B	DRIL38.029	NA	7	5	NA	NA	NA	NA	6
GLS	50180	2015	1	1	10	8	26	1	179	Ki3xOh7B	DRIL38.047	NA	7	5	NA	NA	NA	NA	6
GLS	50181	2015	1	1	10	8	25	1	180	Ki3xOh7B	DRIL38.064	NA	7	5	NA	NA	NA	NA	6
GLS	50182	2015	1	1	10	8	24	1	181	Ki3xOh7B	DRIL38.024	NA	6	4	NA	NA	NA	NA	5
GLS	50183	2015	1	1	10	8	23	1	182	Ki3xOh7B	DRIL38.125	NA	7	5.5	NA	NA	NA	NA	6.3
GLS	50184	2015	1	1	10	8	22	1	183	Ki3xOh7B	DRIL38.111	NA	7.5	5.5	NA	NA	NA	NA	6.5
GLS	50185	2015	1	1	10	8	21	1	184	Ki3xOh7B	DRIL38.142	NA	7	5.5	NA	NA	NA	NA	6.3
GLS	50187	2015	1	1	10	8	19	1	186	Ki3xOh7B	DRIL38.190	NA	7	5.5	NA	NA	NA	NA	6.3
GLS	50188	2015	1	1	10	8	18	1	187	Ki3xOh7B	DRIL38.209	NA	7.5	7	NA	NA	NA	NA	7.3
GLS	50189	2015	1	1	10	8	17	1	188	Ki3xOh7B	DRIL38.210	NA	7.5	7	NA	NA	NA	NA	7.3
GLS	50190	2015	1	1	10	8	16	1	189	Ki3xOh7B	DRIL38.110	NA	7	5	NA	NA	NA	NA	6
GLS	50191	2015	1	1	10	8	15	1	190	Ki3xOh7B	DRIL38.175	NA	7	5	NA	NA	NA	NA	6
GLS	50193	2015	1	1	11	8	13	1	192	Ki3xOh7B	DRIL38.224	NA	6.5	4.5	NA	NA	NA	NA	5.5
GLS	50194	2015	1	1	11	8	12	1	193	Ki3xOh7B	DRIL38.227	NA	7	5	NA	NA	NA	NA	6
GLS	50195	2015	1	1	11	8	11	1	194	Ki3xOh7B	DRIL38.010	NA	5.5	4	NA	NA	NA	NA	4.8
GLS	50198	2015	1	1	11	8	8	1	197	Ki3xOh7B	DRIL38.177	NA	7	6	NA	NA	NA	NA	6.5
GLS	50199	2015	1	1	11	8	7	1	198	Ki3xOh7B	DRIL38.109	NA	NA	NA	NA	NA	NA	NA	NA
GLS	50201	2015	1	1	11	8	5	1	200	Ki3xOh7B	DRIL38.156	NA	NA	NA	NA	NA	NA	NA	NA
GLS	50203	2015	1	1	11	8	3	1	202	Ki3xOh7B	DRIL38.172	NA	7.5	6.5	NA	NA	NA	NA	7
GLS	50204	2015	1	1	11	8	2	1	203	Ki3xOh7B	DRIL38.034	NA	NA	NA	NA	NA	NA	NA	NA
GLS	50205	2015	1	1	11	8	1	1	204	Ki3xOh7B	DRIL38.139	NA	7	6	NA	NA	NA	NA	6.5
GLS	50206	2015	1	1	11	9	1	1	205	Ki3xOh7B	DRIL38.180	NA	7	5.5	NA	NA	NA	NA	6.3
GLS	50208	2015	1	1	11	9	3	1	207	Ki3xOh7B	DRIL38.211	NA	7	5	NA	NA	NA	NA	6
GLS	50209	2015	1	1	11	9	4	1	208	Ki3xOh7B	DRIL38.113	NA	7	6.5	NA	NA	NA	NA	6.8
GLS	50210	2015	1	1	11	9	5	1	209	Ki3xOh7B	DRIL38.199	NA	7.5	6.5	NA	NA	NA	NA	7
GLS	50211	2015	1	1	12	9	6	1	210	Ki3xOh7B	DRIL38.093	NA	7	6.5	NA	NA	NA	NA	6.8
GLS	50212	2015	1	1	12	9	7	1	211	Ki3xOh7B	DRIL38.162	NA	7	5	NA	NA	NA	NA	6
GLS	50213	2015	1	1	12	9	8	1	212	Ki3xOh7B	DRIL38.206	NA	7.5	6.5	NA	NA	NA	NA	7
GLS	50215	2015	1	1	12	9	10	1	214	Ki3xOh7B	DRIL38.194	NA	7.5	5.5	NA	NA	NA	NA	6.5
GLS	50216	2015	1	1	12	9	11	1	215	Ki3xOh7B	DRIL38.147	NA	7	5.5	NA	NA	NA	NA	6.3
GLS	50217	2015	1	1	12	9	12	1	216	Ki3xOh7B	DRIL38.222	NA	7	5	NA	NA	NA	NA	6
GLS	50218	2015	1	1	12	9	13	1	217	Ki3xOh7B	DRIL38.170	NA	8	7	NA	NA	NA	NA	7.5
GLS	50219	2015	1	1	12	9	14	1	218	Ki3xOh7B	DRIL38.077	NA	7	6	NA	NA	NA	NA	6.5
GLS	50220	2015	1	1	12	9	15	1	219	Ki3xOh7B	DRIL38.105	NA	6.5	5	NA	NA	NA	NA	5.8
GLS	50221	2015	1	1	12	9	16	1	220	Ki3xOh7B	DRIL38.140	NA	7.5	6.5	NA	NA	NA	NA	7
GLS	50222	2015	1	1	12	9	17	1	221	Ki3xOh7B	DRIL38.223	NA	7	5	NA	NA	NA	NA	6
GLS	50223	2015	1	1	12	9	18	1	222	Ki3xOh7B	DRIL38.018	NA	7	5.5	NA	NA	NA	NA	6.3
GLS	50225	2015	1	1	12	9	20	1	224	Ki3xOh7B	DRIL38.054	NA	7	6	NA	NA	NA	NA	6.5
GLS	50226	2015	1	1	12	9	21	1	225	Ki3xOh7B	DRIL38.097	NA	7	5.5	NA	NA	NA	NA	6.3
GLS	50228	2015	1	1	12	9	23	1	227	Ki3xOh7B	DRIL38.026	NA	6.5	5	NA	NA	NA	NA	5.8
GLS	50229	2015	1	1	12	9	24	1	228	Ki3xOh7B	DRIL38.122	NA	7	5.5	NA	NA	NA	NA	6.3
GLS	50230	2015	1	1	13	9	25	1	229	Ki3xOh7B	DRIL38.149	NA	7	5	NA	NA	NA	NA	6
GLS	50231	2015	1	1	13	9	26	1	230	Ki3xOh7B	DRIL38.192	NA	7.5	7	NA	NA	NA	NA	7.3
GLS	50232	2015	1	1	13	9	27	1	231	Ki3xOh7B	DRIL38.198	NA	7.5	6	NA	NA	NA	NA	6.8
GLS	50233	2015	1	1	13	9	28	1	232	Ki3xOh7B	DRIL38.056	NA	6	4	NA	NA	NA	NA	5
GLS	50235	2015	1	1	13	9	30	1	234	Ki3xOh7B	DRIL38.158	NA	8	7	NA	NA	NA	NA	7.5
GLS	50236	2015	1	1	13	9	31	1	235	Ki3xOh7B	DRIL38.129	NA	6.5	4	NA	NA	NA	NA	5.3
GLS	50237	2015	1	1	13	9	32	1	236	Ki3xOh7B	DRIL38.023	NA	7.5	5.5	NA	NA	NA	NA	6.5
GLS	50238	2015	1	1	13	9	33	1	237	Ki3xOh7B	DRIL38.101	NA	7.5	6	NA	NA	NA	NA	6.8
GLS	50239	2015	1	1	13	9	34	1	238	Ki3xOh7B	DRIL38.203	NA	7.5	6.5	NA	NA	NA	NA	7
GLS	50240	2015	1	1	13	10	34	1	239	Ki3xOh7B	DRIL38.055	NA	7.5	7	NA	NA	NA	NA	7.3
GLS	50243	2015	1	1	13	10	31	1	242	Ki3xOh7B	DRIL38.216	NA	7.5	6	NA	NA	NA	NA	6.8
GLS	50244	2015	1	1	13	10	30	1	243	Ki3xOh7B	DRIL38.090	NA	5	2	NA	NA	NA	NA	3.5
GLS	50245	2015	1	1	13	10	29	1	244	Ki3xOh7B	DRIL38.069	NA	5	2	NA	NA	NA	NA	3.5
GLS	50246	2015	1	1	13	10	28	1	245	Ki3xOh7B	DRIL38.083	NA	7.5	6.5	NA	NA	NA	NA	7
GLS	50247	2015	1	1	13	10	27	1	246	Ki3xOh7B	DRIL38.016	NA	7.5	6	NA	NA	NA	NA	6.8
GLS	50248	2015	1	1	13	10	26	1	247	Ki3xOh7B	DRIL38.012	NA	8	7	NA	NA	NA	NA	7.5
GLS	50249	2015	1	1	14	10	25	1	248	Ki3xOh7B	DRIL38.015	NA	5	3.5	NA	NA	NA	NA	4.3
GLS	50250	2015	1	1	14	10	24	1	249	Ki3xOh7B	DRIL38.045	NA	6	5	NA	NA	NA	NA	5.5
GLS	50251	2015	1	1	14	10	23	1	250	Ki3xOh7B	DRIL38.197	NA	7.5	6	NA	NA	NA	NA	6.8
GLS	50252	2015	1	1	14	10	22	1	251	Ki3xOh7B	DRIL38.046	NA	6	4	NA	NA	NA	NA	5
GLS	50256	2015	1	1	14	10	18	1	255	Ki3xOh7B	DRIL38.191	NA	7	5	NA	NA	NA	NA	6
GLS	50257	2015	1	1	14	10	17	1	256	Ki3xOh7B	DRIL38.195	NA	7	4	NA	NA	NA	NA	5.5
GLS	50259	2015	1	1	14	10	15	1	258	Ki3xOh7B	DRIL38.084	NA	7.5	7	NA	NA	NA	NA	7.3
GLS	50260	2015	1	1	14	10	14	1	259	Ki3xOh7B	DRIL38.176	NA	7.5	6	NA	NA	NA	NA	6.8
GLS	50261	2015	1	1	14	10	13	1	260	Ki3xOh7B	DRIL38.132	NA	7.5	5	NA	NA	NA	NA	6.3
GLS	50262	2015	1	1	14	10	12	1	261	Ki3xOh7B	DRIL38.208	NA	7	4.5	NA	NA	NA	NA	5.8
GLS	50263	2015	1	1	14	10	11	1	262	Ki3xOh7B	DRIL38.094	NA	7	6	NA	NA	NA	NA	6.5
GLS	50264	2015	1	1	14	10	10	1	263	Ki3xOh7B	DRIL38.017	NA	7	6	NA	NA	NA	NA	6.5
GLS	50265	2015	1	1	14	10	9	1	264	Ki3xOh7B	DRIL38.232	NA	7	6.5	NA	NA	NA	NA	6.8
GLS	50267	2015	1	1	14	10	7	1	266	Ki3xOh7B	DRIL38.021	NA	6.5	5.5	NA	NA	NA	NA	6
GLS	51869	2015	1	2	1	57	33	1	267	Ki3xOh7B	DRIL38.176	NA	6.5	6	NA	NA	NA	NA	6.3
GLS	51871	2015	1	2	1	58	34	1	269	Ki3xOh7B	DRIL38.222	NA	7.5	5	NA	NA	NA	NA	6.3
GLS	51873	2015	1	2	1	58	32	1	271	Ki3xOh7B	DRIL38.217	NA	7	6.5	NA	NA	NA	NA	6.8
GLS	51874	2015	1	2	1	58	31	1	272	Ki3xOh7B	DRIL38.001	NA	7	6	NA	NA	NA	NA	6.5
GLS	51875	2015	1	2	1	58	30	1	273	Ki3xOh7B	DRIL38.189	NA	6	4.5	NA	NA	NA	NA	5.3
GLS	51876	2015	1	2	1	58	29	1	274	Ki3xOh7B	DRIL38.183	NA	6.5	4	NA	NA	NA	NA	5.3
GLS	51878	2015	1	2	1	58	27	1	276	Ki3xOh7B	DRIL38.184	NA	7	6	NA	NA	NA	NA	6.5
GLS	51879	2015	1	2	1	58	26	1	277	Ki3xOh7B	DRIL38.210	NA	7.5	7	NA	NA	NA	NA	7.3
GLS	51880	2015	1	2	1	58	25	1	278	Ki3xOh7B	DRIL38.172	NA	8	7	NA	NA	NA	NA	7.5
GLS	51882	2015	1	2	1	58	23	1	280	Ki3xOh7B	DRIL38.103	NA	5	4	NA	NA	NA	NA	4.5
GLS	51885	2015	1	2	1	58	20	1	283	Ki3xOh7B	DRIL38.069	NA	5	4	NA	NA	NA	NA	4.5
GLS	51886	2015	1	2	1	58	19	1	284	Ki3xOh7B	DRIL38.018	NA	7	4	NA	NA	NA	NA	5.5
GLS	51887	2015	1	2	1	58	18	1	285	Ki3xOh7B	DRIL38.141	NA	7	5	NA	NA	NA	NA	6
GLS	51888	2015	1	2	2	58	17	1	286	Ki3xOh7B	DRIL38.111	NA	NA	NA	NA	NA	NA	NA	NA
GLS	51889	2015	1	2	2	58	16	1	287	Ki3xOh7B	DRIL38.095	NA	7	5	NA	NA	NA	NA	6
GLS	51890	2015	1	2	2	58	15	1	288	Ki3xOh7B	DRIL38.188	NA	7	5.5	NA	NA	NA	NA	6.3
GLS	51891	2015	1	2	2	58	14	1	289	Ki3xOh7B	DRIL38.050	NA	7.5	6	NA	NA	NA	NA	6.8
GLS	51893	2015	1	2	2	58	12	1	291	Ki3xOh7B	DRIL38.085	NA	7	5	NA	NA	NA	NA	6
GLS	51894	2015	1	2	2	58	11	1	292	Ki3xOh7B	DRIL38.186	NA	7	5	NA	NA	NA	NA	6
GLS	51895	2015	1	2	2	58	10	1	293	Ki3xOh7B	DRIL38.170	NA	8	7.5	NA	NA	NA	NA	7.8
GLS	51896	2015	1	2	2	58	9	1	294	Ki3xOh7B	DRIL38.080	NA	8	7	NA	NA	NA	NA	7.5
GLS	51898	2015	1	2	2	58	7	1	296	Ki3xOh7B	DRIL38.023	NA	7	5	NA	NA	NA	NA	6
GLS	51899	2015	1	2	2	58	6	1	297	Ki3xOh7B	DRIL38.142	NA	7	5	NA	NA	NA	NA	6
GLS	51900	2015	1	2	2	58	5	1	298	Ki3xOh7B	DRIL38.148	NA	6	5.5	NA	NA	NA	NA	5.8
GLS	51901	2015	1	2	2	58	4	1	299	Ki3xOh7B	DRIL38.131	NA	NA	NA	NA	NA	NA	NA	NA
GLS	51902	2015	1	2	2	58	3	1	300	Ki3xOh7B	DRIL38.116	NA	7.5	6	NA	NA	NA	NA	6.8
GLS	51904	2015	1	2	2	58	1	1	302	Ki3xOh7B	DRIL38.113	NA	7.5	7	NA	NA	NA	NA	7.3
GLS	51905	2015	1	2	2	59	1	1	303	Ki3xOh7B	DRIL38.051	NA	7	6	NA	NA	NA	NA	6.5
GLS	51907	2015	1	2	3	59	3	1	305	Ki3xOh7B	DRIL38.034	NA	7	6.5	NA	NA	NA	NA	6.8
GLS	51908	2015	1	2	3	59	4	1	306	Ki3xOh7B	DRIL38.228	NA	7	6	NA	NA	NA	NA	6.5
GLS	51909	2015	1	2	3	59	5	1	307	Ki3xOh7B	DRIL38.160	NA	7	5.5	NA	NA	NA	NA	6.3
GLS	51910	2015	1	2	3	59	6	1	308	Ki3xOh7B	DRIL38.151	NA	7	5.5	NA	NA	NA	NA	6.3
GLS	51912	2015	1	2	3	59	8	1	310	Ki3xOh7B	DRIL38.221	NA	NA	NA	NA	NA	NA	NA	NA
GLS	51913	2015	1	2	3	59	9	1	311	Ki3xOh7B	DRIL38.169	NA	NA	NA	NA	NA	NA	NA	NA
GLS	51914	2015	1	2	3	59	10	1	312	Ki3xOh7B	DRIL38.198	NA	NA	NA	NA	NA	NA	NA	NA
GLS	51915	2015	1	2	3	59	11	1	313	Ki3xOh7B	DRIL38.144	NA	NA	NA	NA	NA	NA	NA	NA
GLS	51916	2015	1	2	3	59	12	1	314	Ki3xOh7B	DRIL38.094	NA	NA	NA	NA	NA	NA	NA	NA
GLS	51917	2015	1	2	3	59	13	1	315	Ki3xOh7B	DRIL38.207	NA	7	5	NA	NA	NA	NA	6
GLS	51918	2015	1	2	3	59	14	1	316	Ki3xOh7B	DRIL38.068	NA	7	6	NA	NA	NA	NA	6.5
GLS	51919	2015	1	2	3	59	15	1	317	Ki3xOh7B	DRIL38.032	NA	7.5	7	NA	NA	NA	NA	7.3
GLS	51920	2015	1	2	3	59	16	1	318	Ki3xOh7B	DRIL38.225	NA	7.5	6.5	NA	NA	NA	NA	7
GLS	51922	2015	1	2	3	59	18	1	320	Ki3xOh7B	DRIL38.033	NA	5	3.5	NA	NA	NA	NA	4.3
GLS	51923	2015	1	2	3	59	19	1	321	Ki3xOh7B	DRIL38.122	NA	NA	NA	NA	NA	NA	NA	NA
GLS	51924	2015	1	2	3	59	20	1	322	Ki3xOh7B	DRIL38.120	NA	7	5	NA	NA	NA	NA	6
GLS	51925	2015	1	2	3	59	21	1	323	Ki3xOh7B	DRIL38.203	NA	7.5	7	NA	NA	NA	NA	7.3
GLS	51926	2015	1	2	4	59	22	1	324	Ki3xOh7B	DRIL38.048	NA	6	3	NA	NA	NA	NA	4.5
GLS	51927	2015	1	2	4	59	23	1	325	Ki3xOh7B	DRIL38.035	NA	7	6	NA	NA	NA	NA	6.5
GLS	51928	2015	1	2	4	59	24	1	326	Ki3xOh7B	DRIL38.139	NA	7	5	NA	NA	NA	NA	6
GLS	51929	2015	1	2	4	59	25	1	327	Ki3xOh7B	DRIL38.219	NA	7.5	7	NA	NA	NA	NA	7.3
GLS	51930	2015	1	2	4	59	26	1	328	Ki3xOh7B	DRIL38.129	NA	7	5	NA	NA	NA	NA	6
GLS	51932	2015	1	2	4	59	28	1	330	Ki3xOh7B	DRIL38.195	NA	NA	NA	NA	NA	NA	NA	NA
GLS	51933	2015	1	2	4	59	29	1	331	Ki3xOh7B	DRIL38.073	NA	6.5	5	NA	NA	NA	NA	5.8
GLS	51934	2015	1	2	4	59	30	1	332	Ki3xOh7B	DRIL38.006	NA	7	6	NA	NA	NA	NA	6.5
GLS	51936	2015	1	2	4	59	32	1	334	Ki3xOh7B	DRIL38.112	NA	6	4.5	NA	NA	NA	NA	5.3
GLS	51937	2015	1	2	4	59	33	1	335	Ki3xOh7B	DRIL38.128	NA	5	3	NA	NA	NA	NA	4
GLS	51940	2015	1	2	4	60	33	1	338	Ki3xOh7B	DRIL38.156	NA	NA	NA	NA	NA	NA	NA	NA
GLS	51941	2015	1	2	4	60	32	1	339	Ki3xOh7B	DRIL38.118	NA	6.5	4.5	NA	NA	NA	NA	5.5
GLS	51942	2015	1	2	4	60	31	1	340	Ki3xOh7B	DRIL38.071	NA	6.5	4.5	NA	NA	NA	NA	5.5
GLS	51943	2015	1	2	4	60	30	1	341	Ki3xOh7B	DRIL38.125	NA	7	5.5	NA	NA	NA	NA	6.3
GLS	51944	2015	1	2	4	60	29	1	342	Ki3xOh7B	DRIL38.206	NA	7	5	NA	NA	NA	NA	6
GLS	51945	2015	1	2	5	60	28	1	343	Ki3xOh7B	DRIL38.093	NA	NA	NA	NA	NA	NA	NA	NA
GLS	51946	2015	1	2	5	60	27	1	344	Ki3xOh7B	DRIL38.021	NA	6.5	5.5	NA	NA	NA	NA	6
GLS	51947	2015	1	2	5	60	26	1	345	Ki3xOh7B	DRIL38.011	NA	7.5	6	NA	NA	NA	NA	6.8
GLS	51949	2015	1	2	5	60	24	1	347	Ki3xOh7B	DRIL38.155	NA	6	4.5	NA	NA	NA	NA	5.3
GLS	51950	2015	1	2	5	60	23	1	348	Ki3xOh7B	DRIL38.004	NA	6.5	5	NA	NA	NA	NA	5.8
GLS	51951	2015	1	2	5	60	22	1	349	Ki3xOh7B	DRIL38.126	NA	7	5	NA	NA	NA	NA	6
GLS	51952	2015	1	2	5	60	21	1	350	Ki3xOh7B	DRIL38.024	NA	6.5	4.5	NA	NA	NA	NA	5.5
GLS	51953	2015	1	2	5	60	20	1	351	Ki3xOh7B	DRIL38.038	NA	6.5	4.5	NA	NA	NA	NA	5.5
GLS	51955	2015	1	2	5	60	18	1	353	Ki3xOh7B	DRIL38.044	NA	NA	NA	NA	NA	NA	NA	NA
GLS	51956	2015	1	2	5	60	17	1	354	Ki3xOh7B	DRIL38.158	NA	7	6	NA	NA	NA	NA	6.5
GLS	51958	2015	1	2	5	60	15	1	356	Ki3xOh7B	DRIL38.224	NA	7	5	NA	NA	NA	NA	6
GLS	51959	2015	1	2	5	60	14	1	357	Ki3xOh7B	DRIL38.202	NA	7	6	NA	NA	NA	NA	6.5
GLS	51960	2015	1	2	5	60	13	1	358	Ki3xOh7B	DRIL38.075	NA	NA	NA	NA	NA	NA	NA	NA
GLS	51961	2015	1	2	5	60	12	1	359	Ki3xOh7B	DRIL38.049	NA	NA	NA	NA	NA	NA	NA	NA
GLS	51962	2015	1	2	5	60	11	1	360	Ki3xOh7B	DRIL38.082	NA	NA	NA	NA	NA	NA	NA	NA
GLS	51963	2015	1	2	5	60	10	1	361	Ki3xOh7B	DRIL38.191	NA	NA	NA	NA	NA	NA	NA	NA
GLS	51966	2015	1	2	6	60	7	1	364	Ki3xOh7B	DRIL38.105	NA	7	5	NA	NA	NA	NA	6
GLS	51967	2015	1	2	6	60	6	1	365	Ki3xOh7B	DRIL38.192	NA	7.5	7	NA	NA	NA	NA	7.3
GLS	51968	2015	1	2	6	60	5	1	366	Ki3xOh7B	DRIL38.196	NA	7.5	6.5	NA	NA	NA	NA	7
GLS	51969	2015	1	2	6	60	4	1	367	Ki3xOh7B	DRIL38.150	NA	6	5	NA	NA	NA	NA	5.5
GLS	51971	2015	1	2	6	60	2	1	369	Ki3xOh7B	DRIL38.070	NA	NA	NA	NA	NA	NA	NA	NA
GLS	51972	2015	1	2	6	60	1	1	370	Ki3xOh7B	DRIL38.053	NA	NA	NA	NA	NA	NA	NA	NA
GLS	51974	2015	1	2	6	61	2	1	372	Ki3xOh7B	DRIL38.107	NA	NA	NA	NA	NA	NA	NA	NA
GLS	51975	2015	1	2	6	61	3	1	373	Ki3xOh7B	DRIL38.177	NA	7	6	NA	NA	NA	NA	6.5
GLS	51976	2015	1	2	6	61	4	1	374	Ki3xOh7B	DRIL38.166	NA	5	4	NA	NA	NA	NA	4.5
GLS	51977	2015	1	2	6	61	5	1	375	Ki3xOh7B	DRIL38.009	NA	7	6	NA	NA	NA	NA	6.5
GLS	51978	2015	1	2	6	61	6	1	376	Ki3xOh7B	DRIL38.232	NA	7	6	NA	NA	NA	NA	6.5
GLS	51979	2015	1	2	6	61	7	1	377	Ki3xOh7B	DRIL38.175	NA	7.5	6.5	NA	NA	NA	NA	7
GLS	51981	2015	1	2	6	61	9	1	379	Ki3xOh7B	DRIL38.037	NA	7	6	NA	NA	NA	NA	6.5
GLS	51983	2015	1	2	7	61	11	1	381	Ki3xOh7B	DRIL38.061	NA	7	6	NA	NA	NA	NA	6.5
GLS	51984	2015	1	2	7	61	12	1	382	Ki3xOh7B	DRIL38.090	NA	NA	NA	NA	NA	NA	NA	NA
GLS	51985	2015	1	2	7	61	13	1	383	Ki3xOh7B	DRIL38.040	NA	NA	NA	NA	NA	NA	NA	NA
GLS	51986	2015	1	2	7	61	14	1	384	Ki3xOh7B	DRIL38.209	NA	7	6	NA	NA	NA	NA	6.5
GLS	51987	2015	1	2	7	61	15	1	385	Ki3xOh7B	DRIL38.159	NA	NA	NA	NA	NA	NA	NA	NA
GLS	51988	2015	1	2	7	61	16	1	386	Ki3xOh7B	DRIL38.046	NA	NA	NA	NA	NA	NA	NA	NA
GLS	51990	2015	1	2	7	61	18	1	388	Ki3xOh7B	DRIL38.185	NA	6.5	4	NA	NA	NA	NA	5.3
GLS	51991	2015	1	2	7	61	19	1	389	Ki3xOh7B	DRIL38.167	NA	7	5	NA	NA	NA	NA	6
GLS	51993	2015	1	2	7	61	21	1	391	Ki3xOh7B	DRIL38.145	NA	NA	NA	NA	NA	NA	NA	NA
GLS	51994	2015	1	2	7	61	22	1	392	Ki3xOh7B	DRIL38.060	NA	7	5	NA	NA	NA	NA	6
GLS	51995	2015	1	2	7	61	23	1	393	Ki3xOh7B	DRIL38.056	NA	6	3	NA	NA	NA	NA	4.5
GLS	51996	2015	1	2	7	61	24	1	394	Ki3xOh7B	DRIL38.194	NA	7	5	NA	NA	NA	NA	6
GLS	51998	2015	1	2	7	61	26	1	396	Ki3xOh7B	DRIL38.187	NA	7.5	6	NA	NA	NA	NA	6.8
GLS	52000	2015	1	2	7	61	28	1	398	Ki3xOh7B	DRIL38.096	NA	NA	NA	NA	NA	NA	NA	NA
GLS	52001	2015	1	2	7	61	29	1	399	Ki3xOh7B	DRIL38.072	NA	NA	NA	NA	NA	NA	NA	NA
GLS	52002	2015	1	2	8	61	30	1	400	Ki3xOh7B	DRIL38.114	NA	NA	NA	NA	NA	NA	NA	NA
GLS	52003	2015	1	2	8	61	31	1	401	Ki3xOh7B	DRIL38.083	NA	7.5	7	NA	NA	NA	NA	7.3
GLS	52004	2015	1	2	8	61	32	1	402	Ki3xOh7B	DRIL38.223	NA	7.5	6.5	NA	NA	NA	NA	7
GLS	52005	2015	1	2	8	61	33	1	403	Ki3xOh7B	DRIL38.104	NA	6.5	4	NA	NA	NA	NA	5.3
GLS	52008	2015	1	2	8	62	34	1	405	Ki3xOh7B	DRIL38.017	NA	7	5.5	NA	NA	NA	NA	6.3
GLS	52009	2015	1	2	8	62	33	1	406	Ki3xOh7B	DRIL38.229	NA	6.5	4	NA	NA	NA	NA	5.3
GLS	52010	2015	1	2	8	62	32	1	407	Ki3xOh7B	DRIL38.028	NA	6.5	4	NA	NA	NA	NA	5.3
GLS	52012	2015	1	2	8	62	30	1	409	Ki3xOh7B	DRIL38.201	NA	8	7.5	NA	NA	NA	NA	7.8
GLS	52013	2015	1	2	8	62	29	1	410	Ki3xOh7B	DRIL38.154	NA	6.5	5	NA	NA	NA	NA	5.8
GLS	52016	2015	1	2	8	62	26	1	413	Ki3xOh7B	DRIL38.106	NA	7	5	NA	NA	NA	NA	6
GLS	52017	2015	1	2	8	62	25	1	414	Ki3xOh7B	DRIL38.211	NA	7	5	NA	NA	NA	NA	6
GLS	52019	2015	1	2	8	62	23	1	416	Ki3xOh7B	DRIL38.008	NA	7	6	NA	NA	NA	NA	6.5
GLS	52020	2015	1	2	8	62	22	1	417	Ki3xOh7B	DRIL38.030	NA	7.5	6.5	NA	NA	NA	NA	7
GLS	52021	2015	1	2	8	62	21	1	418	Ki3xOh7B	DRIL38.014	NA	6.5	5	NA	NA	NA	NA	5.8
GLS	52022	2015	1	2	9	62	20	1	419	Ki3xOh7B	DRIL38.108	NA	7.5	6	NA	NA	NA	NA	6.8
GLS	52023	2015	1	2	9	62	19	1	420	Ki3xOh7B	DRIL38.205	NA	7.5	6	NA	NA	NA	NA	6.8
GLS	52024	2015	1	2	9	62	18	1	421	Ki3xOh7B	DRIL38.074	NA	NA	NA	NA	NA	NA	NA	NA
GLS	52026	2015	1	2	9	62	16	1	423	Ki3xOh7B	DRIL38.180	NA	7	5.5	NA	NA	NA	NA	6.3
GLS	52027	2015	1	2	9	62	15	1	424	Ki3xOh7B	DRIL38.133	NA	7.5	5.5	NA	NA	NA	NA	6.5
GLS	52028	2015	1	2	9	62	14	1	425	Ki3xOh7B	DRIL38.045	NA	NA	NA	NA	NA	NA	NA	NA
GLS	52029	2015	1	2	9	62	13	1	426	Ki3xOh7B	DRIL38.077	NA	NA	NA	NA	NA	NA	NA	NA
GLS	52031	2015	1	2	9	62	11	1	428	Ki3xOh7B	DRIL38.012	NA	7.5	6.5	NA	NA	NA	NA	7
GLS	52032	2015	1	2	9	62	10	1	429	Ki3xOh7B	DRIL38.057	NA	7	5.5	NA	NA	NA	NA	6.3
GLS	52033	2015	1	2	9	62	9	1	430	Ki3xOh7B	DRIL38.066	NA	7	5.5	NA	NA	NA	NA	6.3
GLS	52034	2015	1	2	9	62	8	1	431	Ki3xOh7B	DRIL38.036	NA	7	5.5	NA	NA	NA	NA	6.3
GLS	52035	2015	1	2	9	62	7	1	432	Ki3xOh7B	DRIL38.230	NA	7.5	7	NA	NA	NA	NA	7.3
GLS	52036	2015	1	2	9	62	6	1	433	Ki3xOh7B	DRIL38.086	NA	6	4.5	NA	NA	NA	NA	5.3
GLS	52037	2015	1	2	9	62	5	1	434	Ki3xOh7B	DRIL38.226	NA	6.5	5	NA	NA	NA	NA	5.8
GLS	52039	2015	1	2	9	62	3	1	436	Ki3xOh7B	DRIL38.190	NA	6.5	6	NA	NA	NA	NA	6.3
GLS	52040	2015	1	2	9	62	2	1	437	Ki3xOh7B	DRIL38.015	NA	NA	NA	NA	NA	NA	NA	NA
GLS	52041	2015	1	2	10	62	1	1	438	Ki3xOh7B	DRIL38.067	NA	NA	NA	NA	NA	NA	NA	NA
GLS	52042	2015	1	2	10	63	1	1	439	Ki3xOh7B	DRIL38.019	NA	NA	NA	NA	NA	NA	NA	NA
GLS	52044	2015	1	2	10	63	3	1	441	Ki3xOh7B	DRIL38.097	NA	7	5	NA	NA	NA	NA	6
GLS	52045	2015	1	2	10	63	4	1	442	Ki3xOh7B	DRIL38.089	NA	NA	NA	NA	NA	NA	NA	NA
GLS	52047	2015	1	2	10	63	6	1	444	Ki3xOh7B	DRIL38.132	NA	7.5	6	NA	NA	NA	NA	6.8
GLS	52048	2015	1	2	10	63	7	1	445	Ki3xOh7B	DRIL38.127	NA	7	4.5	NA	NA	NA	NA	5.8
GLS	52049	2015	1	2	10	63	8	1	446	Ki3xOh7B	DRIL38.143	NA	7.5	7	NA	NA	NA	NA	7.3
GLS	52050	2015	1	2	10	63	9	1	447	Ki3xOh7B	DRIL38.052	NA	6	5	NA	NA	NA	NA	5.5
GLS	52051	2015	1	2	10	63	10	1	448	Ki3xOh7B	DRIL38.063	NA	NA	NA	NA	NA	NA	NA	NA
GLS	52053	2015	1	2	10	63	12	1	450	Ki3xOh7B	DRIL38.130	NA	NA	NA	NA	NA	NA	NA	NA
GLS	52054	2015	1	2	10	63	13	1	451	Ki3xOh7B	DRIL38.181	NA	6	4.5	NA	NA	NA	NA	5.3
GLS	52055	2015	1	2	10	63	14	1	452	Ki3xOh7B	DRIL38.110	NA	6.5	5	NA	NA	NA	NA	5.8
GLS	52056	2015	1	2	10	63	15	1	453	Ki3xOh7B	DRIL38.220	NA	7	6	NA	NA	NA	NA	6.5
GLS	52057	2015	1	2	10	63	16	1	454	Ki3xOh7B	DRIL38.076	NA	7.5	6	NA	NA	NA	NA	6.8
GLS	52058	2015	1	2	10	63	17	1	455	Ki3xOh7B	DRIL38.016	NA	NA	NA	NA	NA	NA	NA	NA
GLS	52060	2015	1	2	11	63	19	1	457	Ki3xOh7B	DRIL38.020	NA	7.5	6.5	NA	NA	NA	NA	7
GLS	52063	2015	1	2	11	63	22	1	460	Ki3xOh7B	DRIL38.149	NA	6.5	4	NA	NA	NA	NA	5.3
GLS	52064	2015	1	2	11	63	23	1	461	Ki3xOh7B	DRIL38.031	NA	6.5	5	NA	NA	NA	NA	5.8
GLS	52065	2015	1	2	11	63	24	1	462	Ki3xOh7B	DRIL38.153	NA	5	2	NA	NA	NA	NA	3.5
GLS	52067	2015	1	2	11	63	26	1	464	Ki3xOh7B	DRIL38.152	NA	7.5	6	NA	NA	NA	NA	6.8
GLS	52068	2015	1	2	11	63	27	1	465	Ki3xOh7B	DRIL38.140	NA	7	6	NA	NA	NA	NA	6.5
GLS	52069	2015	1	2	11	63	28	1	466	Ki3xOh7B	DRIL38.178	NA	7	6	NA	NA	NA	NA	6.5
GLS	52070	2015	1	2	11	63	29	1	467	Ki3xOh7B	DRIL38.059	NA	NA	NA	NA	NA	NA	NA	NA
GLS	52071	2015	1	2	11	63	30	1	468	Ki3xOh7B	DRIL38.157	NA	7.5	4	NA	NA	NA	NA	5.8
GLS	52072	2015	1	2	11	63	31	1	469	Ki3xOh7B	DRIL38.214	NA	7	6	NA	NA	NA	NA	6.5
GLS	52073	2015	1	2	11	63	32	1	470	Ki3xOh7B	DRIL38.047	NA	7	5	NA	NA	NA	NA	6
GLS	52074	2015	1	2	11	63	33	1	471	Ki3xOh7B	DRIL38.199	NA	7	6	NA	NA	NA	NA	6.5
GLS	52075	2015	1	2	11	63	34	1	472	Ki3xOh7B	DRIL38.058	NA	6	4.5	NA	NA	NA	NA	5.3
GLS	52077	2015	1	2	11	64	33	1	474	Ki3xOh7B	DRIL38.084	NA	7.5	7	NA	NA	NA	NA	7.3
GLS	52078	2015	1	2	11	64	32	1	475	Ki3xOh7B	DRIL38.227	NA	6	4.5	NA	NA	NA	NA	5.3
GLS	52079	2015	1	2	12	64	31	1	476	Ki3xOh7B	DRIL38.003	NA	7	6	NA	NA	NA	NA	6.5
GLS	52080	2015	1	2	12	64	30	1	477	Ki3xOh7B	DRIL38.123	NA	7	6	NA	NA	NA	NA	6.5
GLS	52081	2015	1	2	12	64	29	1	478	Ki3xOh7B	DRIL38.079	NA	7	5	NA	NA	NA	NA	6
GLS	52082	2015	1	2	12	64	28	1	479	Ki3xOh7B	DRIL38.231	NA	8	7.5	NA	NA	NA	NA	7.8
GLS	52083	2015	1	2	12	64	27	1	480	Ki3xOh7B	DRIL38.134	NA	7	5	NA	NA	NA	NA	6
GLS	52084	2015	1	2	12	64	26	1	481	Ki3xOh7B	DRIL38.025	NA	7	5.5	NA	NA	NA	NA	6.3
GLS	52085	2015	1	2	12	64	25	1	482	Ki3xOh7B	DRIL38.054	NA	7	3.5	NA	NA	NA	NA	5.3
GLS	52086	2015	1	2	12	64	24	1	483	Ki3xOh7B	DRIL38.027	NA	6.5	5.5	NA	NA	NA	NA	6
GLS	52088	2015	1	2	12	64	22	1	485	Ki3xOh7B	DRIL38.193	NA	6	5	NA	NA	NA	NA	5.5
GLS	52090	2015	1	2	12	64	20	1	487	Ki3xOh7B	DRIL38.109	NA	6.5	5	NA	NA	NA	NA	5.8
GLS	52091	2015	1	2	12	64	19	1	488	Ki3xOh7B	DRIL38.029	NA	7	5	NA	NA	NA	NA	6
GLS	52092	2015	1	2	12	64	18	1	489	Ki3xOh7B	DRIL38.208	NA	NA	NA	NA	NA	NA	NA	NA
GLS	52093	2015	1	2	12	64	17	1	490	Ki3xOh7B	DRIL38.171	NA	NA	NA	NA	NA	NA	NA	NA
GLS	52094	2015	1	2	12	64	16	1	491	Ki3xOh7B	DRIL38.041	NA	7.5	6	NA	NA	NA	NA	6.8
GLS	52095	2015	1	2	12	64	15	1	492	Ki3xOh7B	DRIL38.062	NA	7.5	6.5	NA	NA	NA	NA	7
GLS	52096	2015	1	2	12	64	14	1	493	Ki3xOh7B	DRIL38.146	NA	NA	NA	NA	NA	NA	NA	NA
GLS	52097	2015	1	2	12	64	13	1	494	Ki3xOh7B	DRIL38.055	NA	NA	NA	NA	NA	NA	NA	NA
GLS	52098	2015	1	2	13	64	12	1	495	Ki3xOh7B	DRIL38.078	NA	NA	NA	NA	NA	NA	NA	NA
GLS	52099	2015	1	2	13	64	11	1	496	Ki3xOh7B	DRIL38.162	NA	7.5	6	NA	NA	NA	NA	6.8
GLS	52101	2015	1	2	13	64	9	1	498	Ki3xOh7B	DRIL38.138	NA	7	5	NA	NA	NA	NA	6
GLS	52102	2015	1	2	13	64	8	1	499	Ki3xOh7B	DRIL38.197	NA	7.5	6.5	NA	NA	NA	NA	7
GLS	52105	2015	1	2	13	64	5	1	502	Ki3xOh7B	DRIL38.117	NA	7	5.5	NA	NA	NA	NA	6.3
GLS	52106	2015	1	2	13	64	4	1	503	Ki3xOh7B	DRIL38.065	NA	7	5.5	NA	NA	NA	NA	6.3
GLS	52107	2015	1	2	13	64	3	1	504	Ki3xOh7B	DRIL38.022	NA	NA	NA	NA	NA	NA	NA	NA
GLS	52108	2015	1	2	13	64	2	1	505	Ki3xOh7B	DRIL38.091	NA	NA	NA	NA	NA	NA	NA	NA
GLS	52110	2015	1	2	13	65	1	1	507	Ki3xOh7B	DRIL38.043	NA	NA	NA	NA	NA	NA	NA	NA
GLS	52111	2015	1	2	13	65	2	1	508	Ki3xOh7B	DRIL38.137	NA	NA	NA	NA	NA	NA	NA	NA
GLS	52112	2015	1	2	13	65	3	1	509	Ki3xOh7B	DRIL38.218	NA	7.5	6	NA	NA	NA	NA	6.8
GLS	52116	2015	1	2	13	65	7	1	513	Ki3xOh7B	DRIL38.007	NA	NA	NA	NA	NA	NA	NA	NA
GLS	52117	2015	1	2	14	65	8	1	514	Ki3xOh7B	DRIL38.147	NA	7.5	6	NA	NA	NA	NA	6.8
GLS	52119	2015	1	2	14	65	10	1	516	Ki3xOh7B	DRIL38.010	NA	7.5	6.5	NA	NA	NA	NA	7
GLS	52120	2015	1	2	14	65	11	1	517	Ki3xOh7B	DRIL38.163	NA	7	5	NA	NA	NA	NA	6
GLS	52121	2015	1	2	14	65	12	1	518	Ki3xOh7B	DRIL38.088	NA	NA	NA	NA	NA	NA	NA	NA
GLS	52122	2015	1	2	14	65	13	1	519	Ki3xOh7B	DRIL38.216	NA	7.5	6.5	NA	NA	NA	NA	7
GLS	52126	2015	1	2	14	65	17	1	523	Ki3xOh7B	DRIL38.119	NA	NA	NA	NA	NA	NA	NA	NA
GLS	52127	2015	1	2	14	65	18	1	524	Ki3xOh7B	DRIL38.026	NA	5.5	5	NA	NA	NA	NA	5.3
GLS	52129	2015	1	2	14	65	20	1	526	Ki3xOh7B	DRIL38.064	NA	7	5	NA	NA	NA	NA	6
GLS	52130	2015	1	2	14	65	21	1	527	Ki3xOh7B	DRIL38.101	NA	7.5	6.5	NA	NA	NA	NA	7
GLS	52131	2015	1	2	14	65	22	1	528	Ki3xOh7B	DRIL38.115	NA	7	5.5	NA	NA	NA	NA	6.3
GLS	52132	2015	1	2	14	65	23	1	529	Ki3xOh7B	DRIL38.136	NA	NA	NA	NA	NA	NA	NA	NA
GLS	52133	2015	1	2	14	65	24	1	530	Ki3xOh7B	DRIL38.168	NA	7.5	5	NA	NA	NA	NA	6.3
GLS	52134	2015	1	2	14	65	25	1	531	Ki3xOh7B	DRIL38.081	NA	7	5	NA	NA	NA	NA	6
GLS	52135	2015	1	2	14	65	26	1	532	Ki3xOh7B	DRIL38.179	NA	7	5	NA	NA	NA	NA	6

## Sheet: Geno
		Public Name	PHM7935-15	PHM4997-17	PZA00181-2	PZA00447-6	PZA00731-6	PZA00566-5	PHM4531-46	PHM3951-25	PHM4913-18	PZA00714-1	PHM9418-11	PZA00205-7	PHM4695-5	PHM2187-46	PHM3147-18	PZA02191-1	PHM1968-22	PZA00289-11	PZA00403-5	PHM759-24	PHM4992-10	PZA00381-3	PZA00137-2	PHM16605-19	PHM3034-3	PZA00364-2	PZB00114-1	PZA01978-23	PZA02957-5	PZA00245-14	PHM18705-23	PZA03076-10	PZA00235-6	PZA00191-5	PZA00623-2	PZA02359-10	PHM9807-9	PZA00680-3	PHM13440-11	PHM5628-11	PZA00396-9	PZA00237-2	PZA02337-4	PHM1962-33	PZA02080-1	PZA00061-1	PHM4880-179
		PublicV3_CHR	1	1	1	1	1	1	1	1	1	1	1	1	1	1	1	1	1	1	1	1	1	1	1	1	1	1	1	1	1	1	1	1	1	1	1	1	1	2	2	2	2	2	2	2	2	2	2
		PublicV3_POS	6227988	6237439	8346760	9047594	9299073	9751470	22891879	31866960	50093991	75776411	97687107	119660210	144982957	157149026	182119770	182565685	183832593	216101748	224143783	226233566	238025441	238402129	248798890	251204469	256548898	269091401	277061165	277668430	282864182	285593335	285721372	288237028	293872766	294571602	294809306	295098628	295508151	1096967	2544671	4195757	4697715	6054619	15591377	25438332	25437939	33974182	107819754
		IBM4_CHR	1	1	1	1	1	1	1	1	1	1	1	1	1	1	1	1	1	1	1	1	1	1	1	1	1	1	1	1	1	1	1	1	1	1	1	1	1	2	2	2	2	2	2	2	2	2	2
		IBM4_cM	21.56	21.6	25.64	26.37	26.63	27.45	48.66	64.24	93.82	106.15	116.2	117.3	118.88	121.1	130.53	130.87	132.3	180.38	188.01	193.56	202.74	202.8	210.54	211.26	216.52	224.3	231.08	231.42	237.82	243.1	243.35	247.76	257.5	259.08	260.32	261.84	264	3.78	10.45	18.12	22.08	27.62	52.18	76.47	76.47	83.14	98.5
		MinMkr	IDP3852_19.500000	IDP3852_19.500000	umc1977_25.600000	umc1977_25.600000	umc1977_25.600000	IDP1437_26.900000	IDP673_46.800000	IDP2385_63.300000	AY110632_87.600000	umc2228_105.400000	mmp39_116.200000	IDP4065_117.300000	umc1076_117.900000	AY110396_121.100000	umc1812_129.500000	umc1812_129.500000	IDP1951_132.300000	IDP641_177.400000	AY110356_188.000000	IDP4061_193.500000	umc2181_202.700000	umc2181_202.700000	umc1991_210.400000	AY109506_210.600000	IDP352_214.000000	IDP261_224.300000	BE639426_229.800000	BE639426_229.800000	IDP2450_237.200000	IDP823_239.600000	IDP823_239.600000	umc1421_246.400000	IDP3868_256.200000	IDP3868_256.200000	IDP772_259.100000	IDP772_259.100000	IDP772_259.100000	umc2246_3.500000	IDP53_5.300000	umc1165_15.500000	umc1542_22.000000	AY109603_26.400000	AY106040_50.000000	AI920398_75.200000	AI920398_75.200000	AY110266_83.100000	IDP723_98.200000
		MaxMkr	bnlg1014_25.200000	bnlg1014_25.200000	IDP1437_26.900000	IDP1437_26.900000	IDP1437_26.900000	IDP847_28.400000	bnlg1953_49.600000	umc1073_65.100000	AY110393_95.700000	IDP1473_106.500000	AY111680_116.200000	IDP2576b_117.300000	AY110396_121.100000	umc1906_121.100000	umc1590_131.100000	umc1590_131.100000	IDP846_135.400000	IDP856_183.000000	umc1128_190.400000	AY110191_193.800000	IDP3997_203.500000	IDP3997_203.500000	cdj2_210.600000	IDP630_211.500000	IDP1420_217.800000	IDP1636_224.300000	IDP2395_233.200000	IDP2395_233.200000	IDP823_239.600000	mmp195g_245.700000	mmp195g_245.700000	IDP691_248.900000	IDP772_259.100000	IDP772_259.100000	umc2045_265.800000	umc2045_265.800000	umc2045_265.800000	IDP2371_5.300000	IDP776_11.200000	IDP677_18.300000	umc1265_24.400000	IDP3972_28.600000	IDP591_53.200000	IDP1968_78.000000	IDP1968_78.000000	mmp167_83.400000	IDP4025_99.400000
Pedigree	Entry	-	-	-	-	-	-	-	-	-	-	-	-	-	-	-	-	-	-	-	-	-	-	-	-	-	-	-	-	-	-	-	-	-	-	-	-	-	-	-	-	-	-	-	-	-	-	-	-
	Oh7B	.	T	C	T	A	G	A	G	T	A	T	T	A	T	T	C	A	G	C	T	A	T	G	T	C	A	A	T	C	T	T	G	A	G	T	C	C	C	A	G	A	C	G	A	T	T	T	T
	Ki3	.	C	T	G	C	A	G	C	C	C	C	C	G	C	A	T	G	A	T	C	G	C	C	C	T	G	T	C	T	G	C	A	G	T	C	G	T	G	C	T	C	A	A	G	C	C	C	C
	Hetero	.	C/T	T/C	G/T	C/A	A/G	G/A	C/G	C/T	C/A	C/T	C/T	G/A	C/T	A/T	T/C	G/A	A/G	T/C	C/T	G/A	C/T	C/G	C/T	T/C	G/A	T/A	C/T	T/C	G/T	C/T	A/G	G/A	T/G	C/T	G/C	T/C	G/C	C/A	T/G	C/A	A/C	A/G	G/A	C/T	C/T	C/T	C/T
	Hetero	.	T/C	C/T	T/G	A/C	G/A	A/G	G/C	T/C	A/C	T/C	T/C	A/G	T/C	T/A	C/T	A/G	G/A	C/T	T/C	A/G	T/C	G/C	T/C	C/T	A/G	A/T	T/C	C/T	T/G	T/C	G/A	A/G	G/T	T/C	C/G	C/T	C/G	A/C	G/T	A/C	C/A	G/A	A/G	T/C	T/C	T/C	T/C
Ki3 x Oh7B BC3F4:5	DRIL 38.001	.	T	C	T	A	G	A	G	T	A	T	T	A	T	T	C	A	G	C	T	A	T	G	T	C	A	A	T	C	T	T	G	A	G	T	C	C	C	A	G	A	C	G	A	T	T	T	C
Ki3 x Oh7B BC3F4:5	DRIL 38.003	.	T	C	T	A	G	A	G	T	A	T	T	A	T	T	C	A	G	C	T	A	T	G	T	C	A	A	T	C	T	T	G	A	G	T	C	C	C	A	G	A	C	G	G	T	T	T	T
Ki3 x Oh7B BC3F4:5	DRIL 38.004	.	T	C	T	A	G	A	G	T	A	T	T	A	T	T	C	A	G	C	T	A	T	G	T	C	A	A	T	C	T	T	G	A	G	T	C	C	C	A	G	A	C	G	A	T	T	T	T
Ki3 x Oh7B BC3F4:5	DRIL 38.006	.	T	C	T	A	G	A	G	T	A	T	T	A	T	T	C	A	G	T	C	G	C	C	C	T	G	T	T	C	T	T	G	A	G	C	C	C	C	A	G	A	C	G	A	T	T	T	T
Ki3 x Oh7B BC3F4:5	DRIL 38.007	.	T	C	T	A	G	A	G	T	A	T	T	A	T	T	C	A	G	C	T	A	T	G	T	C	A	A	T	C	T	T	G	A	G	T	C	C	C	A	G	A	C	G	A	T	T	T	T
Ki3 x Oh7B BC3F4:5	DRIL 38.008	.	T	C	T	A	G	A	G	T	A	T	T	A	T	T	C	A	G	-	C	G	-	-	C/T	C/T	G	T	C/T	T	T	T	G	A	G	T	C	C	C	A	G	A	C	G	A	T	T	T	T
Ki3 x Oh7B BC3F4:5	DRIL 38.009	.	T	C	T	A	G	A	G	T	A	C	C	G	C	A	T	G	A	T	C	G	T	G	C	C	A	A	T	C	T	T	G	A	G	C	C	C	C	A	G	A	C	G	A	T	T	T	T
Ki3 x Oh7B BC3F4:5	DRIL 38.010	.	T	C	T	A	G	A	G	T	A	T	T	A	T	T	C	A	G	T	C	G	C	C	C	T	G	A	T	C	T	T	G	A	G	T	C	C	C	A	G	A	C	G	A	T	T	T	T
Ki3 x Oh7B BC3F4:5	DRIL 38.011	.	T	C	T	A	G	A	G	T	A	T	T	A	T	T	C	A	G	C	T	A	T	G	T	C	A/G	T	C	T	T	T	G	A	G	T	C	C	C	A	G	A	C	G	A	T	T	T	T
Ki3 x Oh7B BC3F4:5	DRIL 38.012	.	C/T	-	T	A	G	A/G	G	T	A	C/T	T	A	-	A/T	C	A	G	C	T	A	T	G	T	C	A	A/T	T	C	-	C/T	A/G	A	G	T	G	-	-	A	T	A	C	G	G	T	T	T	T
Ki3 x Oh7B BC3F4:5	DRIL 38.014	.	T	C	T	A	G	A	G	T	A	T	T	A	T	T	C	A	G	C	T	A	T	G	T	C	A	A	T	C	T	T	G	A	G	T	C	C	C	A	G	A	C	G	A	T	T	T	-
Ki3 x Oh7B BC3F4:5	DRIL 38.015	.	T	C	T	A	G	A	G	C	C	C	C	G	C	A	C	A	G	C	T	A	T	G	T	C	A	A	T	C	T	T	G	A	G	T	C	C	C	A	G	A	C	G	A	T	T	C/T	-
Ki3 x Oh7B BC3F4:5	DRIL 38.016	.	T	C	T	A	G	A	G	T	A	T	C	G	C	A	C	A	G	C	T	A	T	G	T	C	A	A	T	C	T	T	G	A	G	T	C	C	C	A	G	A	C	G	A	T	T	T	T
Ki3 x Oh7B BC3F4:5	DRIL 38.017	.	T	C	T	A	G	A	G	T	A	T	T	A	T	T	-	-	A/G	C	T	A	T	G	T	C	A	A	T	C	T	T	G	A	G	T	C	C	C	A	G	A	C	G	A	T	T	T	T
Ki3 x Oh7B BC3F4:5	DRIL 38.018	.	T	C	T	A	G	A	G	T	A	T	T	A	T	T	C	A	G	C	T	A	T	G	T	C	A	A	T	C	T	T	G	A	G	T	C	C	C	A	G	A	C	G	A	T	T	T	T
Ki3 x Oh7B BC3F4:5	DRIL 38.019	.	T	C	T	A	G	A	G	T	A	T	T	A	T	T	C	A	G	C	T	A	T	G	T	C	A	A	T	C	T	T	G	A	T	T	G	C	C	A	G	A	C	G	A	T	T	T	T
Ki3 x Oh7B BC3F4:5	DRIL 38.020	.	T	C	T	A	G	A	C	C	A	T	T	A	T	T	C	A	G	C	T	A	T	G	T	C	A	A	T	C	T	T	G	A	G	T	C	C	C	A	G	A	C	G	A	T	T	T	T
Ki3 x Oh7B BC3F4:5	DRIL 38.021	.	T	C	T	A	G	A	G	T	A	T	T	A	T	T	C	A	G	C	T	A	T	G	T	C	A	A	T	C	T	T	G	A	G	T	C	C	C	A	G	A	C	G	A	T	T	T	T
Ki3 x Oh7B BC3F4:5	DRIL 38.022	.	T	C	T	A	G	A	G	T	A	T	T	A	T	T	T	G	A	-	C/T	G	C	C	C	T	G	T	C/T	T	-	C/T	A/G	G	T	T	C	C	C	A	G	A	C	G	A	T	T	T	T
Ki3 x Oh7B BC3F4:5	DRIL 38.023	.	T	C	T	A	G	A	G	T	A	T	T	A	T	T	C	A	G	C	T	A	T	G	T	C	A	A	T	C	T	T	G	A	G	T	C	C	C	A	G	A	C	G	A	T	T	T	T
Ki3 x Oh7B BC3F4:5	DRIL 38.024	.	T	C	T	A	G	A	G	T	A	T	T	A	T	T	C	A	G	C	T	A	T	G	T	C	A	A	T	C	T	T	G	A	G	T	C	C	C	A	G	A	C	G	A	T	T	T	T
Ki3 x Oh7B BC3F4:5	DRIL 38.025	.	T	C	T	A	G	A	G	T	A	T	T	A	T	T	C	A	G	C	T	A	T	G	T	C	A	A	T	C	T	T	G	A	G	T	C	C	C	A	G	A	C	G	A	T	T	T	T
Ki3 x Oh7B BC3F4:5	DRIL 38.026	.	T	C	T	A	G	A	G	T	A	T	T	A	T	T	C	A	G	C	T	A	T	G	T	C	A	A	T	C	T	T	G	A	G	T	C	C	C	A	G/T	A/C	A/C	A/G	A	T	T	T	T
Ki3 x Oh7B BC3F4:5	DRIL 38.027	.	T	C	T	A	G	A	G	T	A	C	C	G	C	A	T	G	A	C	T	A	T	G	T	C	A	A	T	C	G	C	A	A	T	T	G	T	G	A	G	A	C	G	A	T	T	T	T
Ki3 x Oh7B BC3F4:5	DRIL 38.028	.	T	C	T	A	G	A	G	T	A	T	T	A	T	T	C	A	G	C	T	A	T	G	T	C	A	T	C	T	T	T	G	A	G	T	C	C	C	A	G	A	C	G	A	T	T	T	T
Ki3 x Oh7B BC3F4:5	DRIL 38.029	.	T	C	T	A	G	A	G	T	A	T	T	A	T	T	C	A	G	C	T	A	T	G	T	C	A	A	T	C	T	T	G	A	G	T	C	C	C	A	G	A	C	G	A	T	T	T	T
Ki3 x Oh7B BC3F4:5	DRIL 38.030	.	T	C	T	A	G	A	G	C	C	C	T	A	T	T	C	A	G	C	T	A	T	G	T	C	A	A	T	C	T	T	G	A	G	T	C	C	C	A	G	A	C	G	A	T	T	T	T
Ki3 x Oh7B BC3F4:5	DRIL 38.031	.	T	C	T	A	G	A	G	T	A	T	T	A	T	T	C	A	G	C	T	A	T	G	T	C	A	A	T	C	T	T	G	A	G	T	C	C	C	A	G	A	C	G	A	T	T	T	T
Ki3 x Oh7B BC3F4:5	DRIL 38.032	.	C	T	G	C	A	G	C	C	C	T	T	A	T	T	C	A	G	C	T	A	T	G	T	C	A	A	T	C	T	T	G	A	G	T	C	C	C	A	G	A	C	G	A	T	T	T	T
Ki3 x Oh7B BC3F4:5	DRIL 38.033	.	T	C	T	A	G	A	G	T	A	T	T	A	T	T	C	A	G	C	T	A	T	G	T	C	A	A	T	C	T	T	G	A	G	T	C	C	C	A	G	A	C	G	A	T	T	T	T
Ki3 x Oh7B BC3F4:5	DRIL 38.034	.	T	C	T	A	G	A	G	T	A	T	T	A	T	T	C	A	G	C	T	A	T	G	T	C	A	A	T	C	T	T	G	A	G	T	C	C	C	A	G	A	C	G	A	T	T	T	T
Ki3 x Oh7B BC3F4:5	DRIL 38.035	.	T	C	T	A	G	A	G	T	A	T	T	A	T	T	C	A	G	C	T	A	T	G	T	C	A	A	T	C	T	T	G	A	G	T	C	C	C	A	G	A	C	G	A	T	T	T	T
Ki3 x Oh7B BC3F4:5	DRIL 38.036	.	T	C	T	A	G	A	G	T	A	T	T	A	T	T	C	A	G	C	T	A	T	G	T	C	A	A	T	C	T	T	G	A	G	T	C	C	C	A	G	A	C	G	A	T	T	T	T
Ki3 x Oh7B BC3F4:5	DRIL 38.037	.	T	C	T	A	G	A	G	T	A	T	T	A	T	T	C	A	G	C	T	A	T	G	T	C	A	A	T	C	T	T	G	A	G	T	C	C	C	A	G	A	C	G	A	T	T	T	T
Ki3 x Oh7B BC3F4:5	DRIL 38.038	.	C/T	-	T	A	G	A	G	T	A	T	T	A	T	T	C	A	G	C/T	T	A	T	G	T	C	A	A	T	C	T	T	G	A	G	T	C	C	C	A	G	A	C	G	A	T	T	T	T
Ki3 x Oh7B BC3F4:5	DRIL 38.040	.	T	C	T	A	G	A	C	C	C	C	C	G	C	A	T	G	A	T	C	G	T	G	T	C	A	A	T	C	T	T	G	A	G	T	C	C	C	A	G	A	C	G	A	T	T	T	T
Ki3 x Oh7B BC3F4:5	DRIL 38.041	.	T	C	T	A	G	A	C	C	C	C	C	G	C	A	T	G	A	T	C	G	T	G	T	C	A	A	T	C	T	T	G	-	-	-	C/G	-	C	A	G	A	C	G	A	T	T	T	T
Ki3 x Oh7B BC3F4:5	DRIL 38.043	.	T	C	T	A	G	A	G	T	A	T	T	A	T	T	C	A	G	C	-	A/G	C	C	T	C	A	A	T	C	T	T	G	A	G	C	C	C	C	A	G	A	C	G	A	T	T	T	T
Ki3 x Oh7B BC3F4:5	DRIL 38.044	.	C	T	T	A	A	A/G	G	T	A	T	T	A	T	T	C	A	G	C	T	A	T	G	T	C	A	A	T	C	T	T	G	A	G	T	C	C	C	A	G	C	A	G	A	T	T	T	T
Ki3 x Oh7B BC3F4:5	DRIL 38.045	.	T	C	T	A	G	A	G	T	A	T	T	A	T	A	C	A	G	C	C	G	T	G	T	C	A	A	T	C	T	T	G	A	G	T	C	C	C	A	G	A	C	G	A	T	T	C	C
Ki3 x Oh7B BC3F4:5	DRIL 38.046	.	T	C	T	A	G	A	G	C	C	C	C	G	C	A	T	G	A	C	T	A	T	G	T	C	A	A	T	C	T	T	G	A	G	T	C	C	C	A	G	A	C	G	A	T	T	T	T
Ki3 x Oh7B BC3F4:5	DRIL 38.047	.	T	C	T	A	G	A	G	T	A	T	T	A	T	T	C	A	G	C	T	A	T	G	T	C	A	A	T	C	T	T	G	A	G	T	C	C	C	A	G	A	C	G	A	T	T	T	T
Ki3 x Oh7B BC3F4:5	DRIL 38.048	.	T	C	T	A	G	A	G	T	A	T	T	A	T	T	C	A	G	C	C	A	T	G	T	C	A	A	T	C	T	T	G	A	G	T	C	C	C	A	G	A	C	G	A	T	T	T	T
Ki3 x Oh7B BC3F4:5	DRIL 38.049	.	T	C	T	A	G	A	G	T	A	T	T	A	T	T	C	A	G	C	T	A	T	G	T	C	A	A	T	C	T	T	G	A	G	T	C	C	C	A	G	A	C	G	A	T	T	T	T
Ki3 x Oh7B BC3F4:5	DRIL 38.050	.	T	C	T	A	G	A	G	T	A	T	T	A	T	T	C	A	G	C	T	A	T	G	T	C	A	A	T	C	T	T	G	A	G	T	C	C	C	-	G/T	A	A/C	A/G	A	T	T	T	T
Ki3 x Oh7B BC3F4:5	DRIL 38.051	.	T	C	T	A	G	A	G	T	A	T	T	A	T	T	C	A	G	C	T	A	T	G	T	C	A	A	T	C	T	T	G	A	G	T	C	C	C	A	G	A	C	G	A	T	T	T	T
Ki3 x Oh7B BC3F4:5	DRIL 38.052	.	T	C	T	A	G	A	G	T	A	T	T	A	T	T	C	A	G	C	T	A	T	G	T	C	A	A	T	C	T	T	G	A	G	T	C	C	C	A	G	A	C	G	A	T	T	T	T
Ki3 x Oh7B BC3F4:5	DRIL 38.053	.	T	C	T	A	G	A	G	T	A	T	T	A	T	T	C	A	G	C	T	A	T	G	T	C	A	A	T	C	T	T	G	A	G	T	C	C	C	A	G	A	-	A	A	T	T	T	T
Ki3 x Oh7B BC3F4:5	DRIL 38.054	.	T	C	T	A	G	A	G	T	A	T	T	A	T	T	C	A	G	C	T	A	T	G	T	C	A	A	T	C	T	T	G	A	G	T	C	C	C	A	G	A	C	G	A	T	T	T	T
Ki3 x Oh7B BC3F4:5	DRIL 38.055	.	T	C	T	A	G	A	C	C	A	T	T	A	T	T	C	A	G	C	T	A	T	G	T	C	A	A	T	C	T	T	G	A	G	T	C	C	C	A	G	A	C	G	A	T	T	T	T
Ki3 x Oh7B BC3F4:5	DRIL 38.056	.	T	C	T	A	G	A	G	T	A	C	C	A	T	T	C	A	G	C	T	A	T	G	T	C	A	A	T	C	T	T	G	A	T	T	C	C	C	A	G	A	C	G	A	T	T	T	T
Ki3 x Oh7B BC3F4:5	DRIL 38.057	.	T	C	T	A	G	A	G	T	A	T	T	A	T	T	C	A	G	C	T	A	T	G	T	C	A	A	T	C	T	T	G	A	G	T	C	C	C	A	G	A	C	G	A	T	T	T	T
Ki3 x Oh7B BC3F4:5	DRIL 38.058	.	T	C	T	A	G	A	G	T	C	C/T	T	-	-	A/T	C	A	G	C	T	A	T	G	T	C	A	A	T	C	T	T	G	A	G	T	C	C	C	A	G	A	C	G	A	T	T	T	T
Ki3 x Oh7B BC3F4:5	DRIL 38.059	.	T	C	T	A	G	A	G	T	A	T	T	A	T	T	C	A	G	C	T	A	T	G	T	C	A	A	C	T	G	C	A	G	T	T	G	T	G	A	G	A	C	G	A	T	T	T	T
Ki3 x Oh7B BC3F4:5	DRIL 38.060	.	T	C	T	A	G	A	G	T	A	T	T	A	T	T	C	A	G	C	T	A	T	G	T	C	A	A	T	C	T	T	G	A	G	T	C	C	C	A	G	A	C	G	A	T	T	T	T
Ki3 x Oh7B BC3F4:5	DRIL 38.061	.	T	C	T	A	G	A	G	T	A	T	T	A	T	T	C	A	G	C	T	A	T	G	T	C	A	A	T	C	T	T	G	A	G	T	C	C	C	C	T	C	A	A	A	T	T	T	T
Ki3 x Oh7B BC3F4:5	DRIL 38.062	.	T	C	T	A	G	A	C	C	A	T	C	A	T	T	C	A	G	C	T	A	T	G	T	C	A	A	T	C	T	T	G	A	G	T	C	C	C	A	G	A	C	G	A	T	T	T	C
Ki3 x Oh7B BC3F4:5	DRIL 38.063	.	T	C	T	A	G	A	G	T	A	T	T	A	T	T	C	A	G	C	T	A	T	G	T	C	A	A	T	C	T	T	G	A	G	T	C	C	C	A	G	A	C	A	A	T	T	T	T
Ki3 x Oh7B BC3F4:5	DRIL 38.064	.	T	C	T	A	G	A	G	T	A	T	T	A	T	T	C	A	G	C	T	A	T	G	T	C	A	A	T	C	T	T	G	A	G	T	C	C	C	A	G	A	C	G	A	T	T	T	T
Ki3 x Oh7B BC3F4:5	DRIL 38.065	.	T	C	T	A	G	A	G	T	A	T	T	A	T	T	C	A	G	C	T	A	T	G	T	C	A	A	T	C	T	T	G	A	G	T	C	C	C	A	G	A	C	G	A	T	T	T	C
Ki3 x Oh7B BC3F4:5	DRIL 38.066	.	T	C	T	A	G	A	G	T	A	T	T	A	T	T	C	A	G	C	T	A	T	G	T	C	A	A	T	C	T	T	G	A	G	T	C	C	C	A	T	A	C	G	A	T	T	T	T
Ki3 x Oh7B BC3F4:5	DRIL 38.067	.	T	C	T	A	G	A	C	C	C	C	T	A/G	C/T	A/T	T	A/G	A	C	T	A	T	G	T	C	A	A	T	C	T	T	G	A	G	T	C	C	C	A	G	A	C	G	A	T	T	T	T
Ki3 x Oh7B BC3F4:5	DRIL 38.068	.	T	C	T	A	G	A	G	T	A	T	T	A	T	T	C	A	G	C	T	A	T	G	T	C	A	A	T	C	T	T	G	A	G	C	C	C	C	C	T	C	A	A	A	T	T	T	T
Ki3 x Oh7B BC3F4:5	DRIL 38.069	.	T	C	T	A	G	A	G	T	A	T	T	A	T	T	C	A	G	C	T	A	T	G	T	C	A	A	T	C	T	T	G	A	G	T	C	C	C	A	G	A	C	G	A	T	T	T	T
Ki3 x Oh7B BC3F4:5	DRIL 38.070	.	T	C	T	A	G	A	G	T	A	T	T	A	T	T	C	A	G	C	T	A	T	G	T	C	A	A	T	C	T	T	G	A	G	C	C	C	C	A	G	A	C	G	A	T	T	T	T
Ki3 x Oh7B BC3F4:5	DRIL 38.071	.	T	C	T	A	G	A	G	T	A	T	T	A	T	T	C	A	G	C	T	A	T	G	T	C	A	A	C	T	G	C	A	A	G	T	C	C	C	A	G	A	C	G	A	T	T	T	T
Ki3 x Oh7B BC3F4:5	DRIL 38.072	.	T	C	T	A	G	A	G	T	A	T	T	A	T	T	C	A	G	C	C/T	A/G	C/T	-	T	C	A	A	T	C	T	T	G	A	G	T	C	C	C	A	G	A	C	G	A	T	T	T	T
Ki3 x Oh7B BC3F4:5	DRIL 38.073	.	T	C	T	A	G	A	G	T	A	T	T	A	T	T	C	A	G	C	T	A	C	C	C	T	A	T	C	T	T	T	G	A	G	T	C	C	C	A	G	A	C	G	A	T	T	T	T
Ki3 x Oh7B BC3F4:5	DRIL 38.074	.	T	C	T	A	G	A	G	T	A	T	T	A	T	T	C	A	G	C	T	A	T	G	T	C	A	A	T	C	T	T	G	A	G	T	C	C	C	A	G	A	C	G	A	T	T	T	T
Ki3 x Oh7B BC3F4:5	DRIL 38.075	.	T	C	T	C	A	G	G	T	A	T	T	A	T	T	C	A	G	C	T	A	T	G	T	C	A	A	T	C	T	T	G	A	G	T	C	C	G	A	G/T	A/C	A/C	A	A	T	T	T	T
Ki3 x Oh7B BC3F4:5	DRIL 38.076	.	T	C	T	A	G	A	G	T	A	T	T	A	T	T	C	A	G	C	T	A	T	G	T	C	A	A	T	C	T	T	G	A	G	T	C	C	C	A	G	A	C	G	A	T	T	T	T
Ki3 x Oh7B BC3F4:5	DRIL 38.077	.	C	T	G	C	A	G	G	T	A	T	T	A	T	T	C	A	G	C	T	A	T	G	T	C	A	A	T	C	T	T	G	A	G	T	C	C	C	A	G	A	C	G	A	T	T	T	T
Ki3 x Oh7B BC3F4:5	DRIL 38.078	.	T	C	T	A	G	A	G	T	A	T	T	A	T	T	C	A	G	C	T	A	T	G	T	C	A	A	T	C	T	T	G	A	G	T	C	C	C	A	G	A	C	G	A	T	T	T	T
Ki3 x Oh7B BC3F4:5	DRIL 38.079	.	T	C	T	A	G	A	G	T	A	T	T	A	T	T	C	A	G	C	T	A	T	G	T	C	A	A	T	C	T	T	G	A	G	T	C	C	C	A	G	A	C	A	A	T	T	T	T
Ki3 x Oh7B BC3F4:5	DRIL 38.080	.	T	C	T	A	G	A	G	T	A	T	C	G	C	A	T	G	A	C	T	A	T	G	T	C	A	T	-	-	T	T	G	A	G	T	C	C	C	A	G	A	C	G	A	T	T	T	T
Ki3 x Oh7B BC3F4:5	DRIL 38.081	.	T	C	T	A	G	A	G	T	A	T	T	A	T	T	C	A	G	-	-	G	C	C	C	T	A	A	T	C	T	T	G	A	G	T	C	C	C	A	G	A	C	G	A	C	C	C	C
Ki3 x Oh7B BC3F4:5	DRIL 38.082	.	T	C	T	A	G	A	G	T	A	T	T	A	T	T	C	A	G	C	T	A	T	G	T	C	A	A	T	C	T	T	G	A	G	T	C	C	C	A	G	A	C	G	A	T	T	T	T
Ki3 x Oh7B BC3F4:5	DRIL 38.083	.	T	C	T	A	G	A	G	T	A	T	T	A	T	T	C	A	G	T	C	G	C	C	C	T	A	A	T	C	T	T	G	A	G	C	C	C	C	A	G/T	A	C	G	A	T	T	T	T
Ki3 x Oh7B BC3F4:5	DRIL 38.084	.	T	C	G	C	A	G	G	C	A	T	T	A	T	T	C	A	G	C	T	A	T	G	C	T	G	A	C	T	G	C	A	G	G/T	T	C/G	C/T	C	A	G	A	C	G	A	T	T	T	T
Ki3 x Oh7B BC3F4:5	DRIL 38.085	.	T	C	T	A	G	A	G	T	A	T	T	A	T	T	C	A	G	C	T	A	T	G	T	C	A	T	T	C	T	T	G	A	G	T	C	C	C	A	G	A	C	G	A	T	T	T	T
Ki3 x Oh7B BC3F4:5	DRIL 38.086	.	T	C	T	A	G	A	C	T	A	T	T	A	T	T	C	A	G	C	T	A	T	G	T	C	A	A	T	C	T	T	G	A	G	T	C	C	C	A	G	A	C	G	A	T	T	T	T
Ki3 x Oh7B BC3F4:5	DRIL 38.088	.	T	C	T	A/C	G	A	G	T	A	-	C/T	G/A	-	A/T	C	A	G	C	T	A	T	G	T	C/T	A	A	T	C	T	T	G	A	G	T	C	C	C	A	G	A	C	G	A	T	T	T	T
Ki3 x Oh7B BC3F4:5	DRIL 38.089	.	T	C	T	A	G	A	G	T	A	T	T	A	T	T	C	A	G	C	T	A	T	G	T	C	A	A	T	C	T	T	G	A	G	T	C	C	C	C	T	A	C	G	A	T	T	T	T
Ki3 x Oh7B BC3F4:5	DRIL 38.090	.	T	C	T	A	G	A	G	T	A	T	T	A	T	T	C	A	G	C	T	A	T	G	T	C	A	A	T	C	T	T	G	A	G	T	C	C	C	A	G	A	C	G	A	T	T	T	T
Ki3 x Oh7B BC3F4:5	DRIL 38.091	.	T	C	T	A	G	A	G	T	A	T	T	A	T	T	C	A	G	C	T	A	T	G	T	C	A	A	T	C	T	T	G	A	G	T	C	C	C	A	G	A	C	G	A	T	T	T	T
Ki3 x Oh7B BC3F4:5	DRIL 38.093	.	T	C	T	A	G	A	G	T	A	T	T	A	T	T	C	A	G	C	T	A	T	G	T	C	A	A	T	C	T	T	G	A	G	T	C	C	C	A	G	A	C	G	A	T	T	T	C
Ki3 x Oh7B BC3F4:5	DRIL 38.094	.	T	C	T	A	G	A	G	T	A	T	T	A	T	T	C	A	G	C	T	A	T	G	T	C	A	A	T	C	T	T	G	A	G	T	C	C	C	A	G	A	C	G	A	-	C/T	T	T
Ki3 x Oh7B BC3F4:5	DRIL 38.095	.	T	C	T	A	G	A	G	T	A	T	T	A	T	T	C	A	G	C	T	A	T	G	T	C	A	A	T	C	T	T	G	A	G	T	C	C	C	A	G	A	C	G	A	T	T	T	T
Ki3 x Oh7B BC3F4:5	DRIL 38.096	.	T	C	G	C	A	A	G	T	A	T	T	A	T	T	C	A	G	C	T	A	T	G	T	C	A	A	T	C	T	T	G	A	G	T	C	C	C	A	G	A	C	G	A	T	T	T	T
Ki3 x Oh7B BC3F4:5	DRIL 38.097	.	T	C	T	A	G	A	G	T	A	T	T	A	T	T	C	A	G	C	T	A	T	G	T	C	A	A	T	C	T	T	G	A	G	T	C	C	C	A	G	A	C	G	A	T	T	T	T
Ki3 x Oh7B BC3F4:5	DRIL 38.101	.	T	C	T	A	G	A	C	C	C	T	T	A	T	T	C	A	G	C	T	A	T	G	T	C	A	A	T	C	T	T	G	A	G	T	C/G	C/T	G	A	G	A	C	G	A	T	T	T	T
Ki3 x Oh7B BC3F4:5	DRIL 38.103	.	T	C	T	A	G	A	G	T	A	T	T	A	T	T	C	A	G	C	T	A	T	G	T	C	A	A	T	C	T	T	G	A	G	T	C	C	C/G	A	G	A	C	G	A	T	T	T	T
Ki3 x Oh7B BC3F4:5	DRIL 38.104	.	T	C	T	A	G	A	G	T	A	T	T	A	T	T	C	A	G	C	T	A	T	G	T	C	A	A	T	C	T	T	G	A	G	T	C	C	C	A	G	A	C	G	A	T	T	T	T
Ki3 x Oh7B BC3F4:5	DRIL 38.105	.	T	C	T	A	G	A	G	T	A	T	T	A	T	T	C	A	G	C	T	A	T	G	T	C	A	A	T	C	T	T	G	A	G	T	C	C	C	A	G	A	C	G	A	T	T	T	T
Ki3 x Oh7B BC3F4:5	DRIL 38.106	.	T	C	T	A	G	A	G	T	A	T	T	A	T	T	C	A	G	C/T	C/T	A/G	C/T	C/G	C/T	C/T	A	A	T	C	T	T	G	A	G	T	C	C	C	A	G	A	C	G	A	T	T	T	T
Ki3 x Oh7B BC3F4:5	DRIL 38.107	.	T	C	T	A	G	A	G	T	A	T	T	A	T	T	C	A	G	C	T	A	T	G	T	C	A	A	T	C	T	T	G	A	G	T	C	C	C	A	G	A	C	G	A	T	T	T	T
Ki3 x Oh7B BC3F4:5	DRIL 38.108	.	T	C	T	A	G	A	G	T	A	T	T	A	T	T	C	A	G	C	T	A	T	G	T	C	A	A	T	C	T	T	G	A	G	T	C	C	C	A	G	A	C	G	A	T	T	T	T
Ki3 x Oh7B BC3F4:5	DRIL 38.109	.	T	C	T	A	G	A	G	T	A	T	T	A	T	T	C	A	G	C	T	A	T	G	T	C	A	A	T	C	T	T	G	A	G	T	C	C	C	A	G	A	C	G	A	T	T	T	T
Ki3 x Oh7B BC3F4:5	DRIL 38.110	.	T	C	T	A	G	A	G	T	A	C	T	A	T	T	C	A	G	C	T	A	T	G	T	C	A	A	T	C	T	T	G	A	G	T	C	C	C	A	G	A	C	G	A	T	T	T	T
Ki3 x Oh7B BC3F4:5	DRIL 38.111	.	T	C	T	A	G	A	G	T	A	T	T	A	T	T	C	A	G	C	T	A	T	G	T	C	A	A	T	C	T	T	G	A	G	T	C	C	C	A	G	A	C	G	A	T	T	T	T
Ki3 x Oh7B BC3F4:5	DRIL 38.112	.	T	C	T	A	G	A	G	T	A	T	T	A	T	T	C	A	G	C	T	A	T	G	T	C	A	A	T	C	T	T	G	A	G	T	C	C	C	A	G	A	C	G	A	T	T	T	T
Ki3 x Oh7B BC3F4:5	DRIL 38.113	.	T	C	T	A	G	A	C	C	C	C	C	G	C	A	T	G	A	T	C	G	C	C	C	T	G	T	C	T	T	T	G	A	G	T	C	C	C	A	G	A	C	G	A	T	T	T	T
Ki3 x Oh7B BC3F4:5	DRIL 38.114	.	T	C	T	A	G	A	C	T	A	T	T	A	T	T	C	A	G	C	T	A	T	G	T	C	A	A	T	C	T	T	G	A	G	T	C	C	C	A	G	A	C	G	A	T	T	T	T
Ki3 x Oh7B BC3F4:5	DRIL 38.115	.	T	C	T	A	G	G	C	-	A	T	-	-	C/T	A/T	C	A	G	C	T	A	T	G	T	C	A	A	T	C	T	T	G	A	G	T	C	C	C	A	G	A	C	G	A	T	T	T	T
Ki3 x Oh7B BC3F4:5	DRIL 38.116	.	T	C	T	A	G	A	G	T	A	T	T	A	T	T	C	A	G	C	T	A	T	G	T	C	A	A	T	C	T	T	G	A	G	T	C	C	C	A	G	A	C	G	A	T	T	T	T
Ki3 x Oh7B BC3F4:5	DRIL 38.117	.	T	C	T	A	G	A	G	T	A	T	T	A	T	T	C	A	G	C	T	A	T	G	T	C	A	A	T	C	T	T	G	A	G	T	G	T	G	A	G	A	C	G	G	T	T	T	T
Ki3 x Oh7B BC3F4:5	DRIL 38.118	.	T	C	T	A	G	A	G	T	A	T	T	A	T	T	C	A	G	C	T	A	T	G	T	C	A	A	T	C	T	T	G	A	G	T	C	C	C	A	G	A	C	G	A	T	T	T	T
Ki3 x Oh7B BC3F4:5	DRIL 38.119	.	T	C	T	A	G	A	G	T	A	T	T	A	T	T	C	A	G	C	T	A	T	G	T	C	A	A	T	C	T	T	G	A	G	T	C	C	C	A	G	A	C	G	A	T	T	T	T
Ki3 x Oh7B BC3F4:5	DRIL 38.120	.	T	C	T	A	G	A	G	T	A	T	T	A	T	T	C	A	G	C	C	G	C	C	C	T	G	T	T	C	T	T	G	A	G	T	C	C	C	A	G	A	C	G	A	T	T	T	C
Ki3 x Oh7B BC3F4:5	DRIL 38.122	.	T	C	T	A	G	A	G	T	A	T	C	G	C	A	C	A	G	C	T	A	T	G	T	C	A	A	T	C	T	T	G	A	G	T	C	C	C	A	G	A	C	G	G	C	C	C	C
Ki3 x Oh7B BC3F4:5	DRIL 38.123	.	T	C	T	A	-	A/G	G	T	A	T	T	A	T	T	C	A	G	C	T	A	T	G	T	C	A	A	T	C	T	T	G	A	G	T	C	C	C	A	G	A	C	G	A	T	T	T	T
Ki3 x Oh7B BC3F4:5	DRIL 38.125	.	T	C	T	A	G	A	G	C	C	C	C	G	C	A	T	G	A	T	C	G	C	C	T	C	A	A	T	C	T	T	G	A	G	T	C	C	C	A	G	A	C	G	A	T	T	T	T
Ki3 x Oh7B BC3F4:5	DRIL 38.126	.	T	C	T	A	G	A	G	T	A	T	T	A	T	T	C	A	G	C	T	A	T	G	T	C	A	A	T	C	T	T	G	A	G	T	C	C	C	A	G	A	C	G	A	T	T	T	T
Ki3 x Oh7B BC3F4:5	DRIL 38.127	.	-	-	G/T	A/C	A/G	A/G	G	T	A	T	T	A	T	T	C	A	G	C	T	A	T	G	T	C	A	A	T	C	T	T	G	A	G	T	C	C	C	A	G	A	C	G	A	T	T	T	T
Ki3 x Oh7B BC3F4:5	DRIL 38.128	.	T	C	T	A	G	A	G	T	A	T	T	A	T	T	C	A	G	C	T	A	T	G	T	C	A	A	T	C	T	T	G	A	G	T	C	C	C	A	G	A	C	G	A	T	T	T	C
Ki3 x Oh7B BC3F4:5	DRIL 38.129	.	T	C	T	A	G	A	G	T	A	T	T	A	T	T	C	A	G	C	T	A	T	G	T	C	A	A	T	C	T	T	G	A	G	T	C	C	C	A	G	A	C	G	A	T	T	T	T
Ki3 x Oh7B BC3F4:5	DRIL 38.130	.	T	C	T	A	G	A	G	T	A	T	T	A	T	T	C	A	G	C	T	A	T	G	T	C	A	A	T	C	T	T	G	A	G	T	C	C	C	A	G	A	A	A	A	T	T	T	T
Ki3 x Oh7B BC3F4:5	DRIL 38.131	.	T	C	T	A	G	A	G	T	A	T	T	A	T	T	C	A	G	C	T	A	T	G	T	C	A	A	T	C	T	T	G	A	G	T	C	C	C	A	G	A	C	G	A	T	T	T	T
Ki3 x Oh7B BC3F4:5	DRIL 38.132	.	T	C	T	A	G	A	G	T	A	T	T	A	T	T	C	A	G	C	T	A	T	G	T	C	A	A	T	C	T	T	G	A	G	T	C	C	C	A	G	A	C	G	A	T	T	T	T
Ki3 x Oh7B BC3F4:5	DRIL 38.133	.	T	C	T	A	G	A	G	T	A	T	T	A	T	T	C	A	G	C	T	A	T	G	T	C	A	A	T	C	T	T	G	A	G	T	C	C	C	A	G	A	C	G	A	T	T	T	C/T
Ki3 x Oh7B BC3F4:5	DRIL 38.134	.	T	C	T	A	G	A	G	T	A	T	T	A	T	T	C	A	G	C	T	A	T	G	T	C	A	A	T	C	T	T	G	A	G	T	C	C	C	A	G	A	C	G	A	T	T	T	T
Ki3 x Oh7B BC3F4:5	DRIL 38.136	.	T	C	T	A	G	A	G	T	A	T	T	A	T	T	C	A	G	C	T	A	T	G	T	C	A	A	T	C	T	T	G	A	G	T	C	C	C	C	T	C	A	A	A	T	T	T	T
Ki3 x Oh7B BC3F4:5	DRIL 38.137	.	T	C	T	A	G	A	G	T	A	C	T	A	T	T	C	A	G	C	T	G	T	G	T	C	A	A	C	T	G	C	A	G	T	T	G	C	C	A	G	A	C	G	A	T	T	T	T
Ki3 x Oh7B BC3F4:5	DRIL 38.138	.	T	C	T	A	G	A	G	T	A	T	T	A	T	T	C	A	G	C	T	A	T	G	T	C	A	A	T	C	T	T	G	A	G	T	C	C	C	A	G	A	C	G	A	T	T	T	T
Ki3 x Oh7B BC3F4:5	DRIL 38.139	.	T	C	T	A	G	A	G	T	A	T	T	A	T	A	T	G	A	T	C	G	T	G	T	C	A	A	T	C	T	T	G	A	G	T	C	C	C	A	G	A	C	G	A	T	T	T	T
Ki3 x Oh7B BC3F4:5	DRIL 38.140	.	T	C	T	A	G	A	C	C	C	C	C	G	C	A	T	G	A	C	T	A	T	G	T	C	A	A	T	C	T	T	G	A	G	T	C	C	C	A	G	A	C	G	A	T	T	T	T
Ki3 x Oh7B BC3F4:5	DRIL 38.141	.	T	C	T	A	G	A	G	T	A	T	T	A	T	T	C	A	G	C	T	A	T	G	T	C	A	A	T	C	T	T	G	A	G	T	C	C	C	A	G	A	C	G	A	T	T	T	T
Ki3 x Oh7B BC3F4:5	DRIL 38.142	.	T	C	T	A	G	A	G	T	A	T	T	A	T	T	C	A	G	C	T	A	T	G	T	C	A	A	T	C	T	T	G	A	G	T	C	C	C	A	G	A	C	A/G	A	T	T	T	T
Ki3 x Oh7B BC3F4:5	DRIL 38.143	.	C	T	G	C	A	G	C	C	A	C	C	G	C	A	C	A	G	C	T	A	T	G	T	C	A	A	T	C	T	T	G	A	G	T	C	C	C	A	G	A	C	A	A	T	T	T	T
Ki3 x Oh7B BC3F4:5	DRIL 38.144	.	T	C	T	A	G	A	G	T	A	T	T	A	T	T	C	A	G	C	T	A	T	G	T	C	A	A	T	C	T	T	G	A	G	T	C	C	C	A	G	A	C	G	A	T	T	T	T
Ki3 x Oh7B BC3F4:5	DRIL 38.145	.	T	C	T	A	G	A	G	T	A	T	T	A	T	T	C	A	G	T	T	A	T	G	T	C	A	A	T	C	G	C	A	G	T	T	G	T	G	A/C	G/T	C/A	A/C	A	G	C	C	T	T
Ki3 x Oh7B BC3F4:5	DRIL 38.146	.	T	C	T	A	G	A	G	T	A	T	T	A	T	T	C	A	G	C	T	A	T	G	T	C	A	A	T	C	T	T	G	A	G	T	C	C	C	A	G	A	C	G	A	T	T	T	C
Ki3 x Oh7B BC3F4:5	DRIL 38.147	.	T	C	T	A	G	G	G	T	A	T	T	A	T	T	C	A	G	C	T	A	T	G	T	C	A	A	T	C	T	T	G	A	G	T	C	C	C	A	G	A	C	G	A	T	T	T	T
Ki3 x Oh7B BC3F4:5	DRIL 38.148	.	T	C	T	A	G	A	G	T	A	T	T	A	T	T	C	A	G	C	T	A	T	G	C	C	A	T	C	T	T	T	G	A	G	T	C	C	C	C	T	C	C	G	A	T	T	T	T
Ki3 x Oh7B BC3F4:5	DRIL 38.149	.	T	C	T	A	G	A	G	T	A	T	T	A	T	T	C	A	G	C	T	A	T	G	T	C	A	A	T	C	T	C	-	-	G	T	C	C	C	A	G	A	C	G	A	T	T	T	T
Ki3 x Oh7B BC3F4:5	DRIL 38.150	.	T	C	T	A	G	A	G	T	A	T	T	A	T	T	C	A	G	C	T	A	T	G	T	C	A	A	T	C	T	T	G	G	G	T	C	C	C	A	G	A	C	G	A	T	T	T	T
Ki3 x Oh7B BC3F4:5	DRIL 38.151	.	T	C	T	A	G	A	G	T	A	T	T	A	T	T	C	A	G	C	T	A	T	G	T	C	A	A	T	C	T	T	G	A	G	T	C	C	C	A	G	A	C	G	A	T	T	T	T
Ki3 x Oh7B BC3F4:5	DRIL 38.152	.	T	C	T	A	G	A	G	-	C	C	C	G	C	A	T	G	A	C	T	A	T	G	T	C	A	A	T	C	T	T	G	A	G	T	C	C	C	A	G	A	C	G	A	T	T	T	-
Ki3 x Oh7B BC3F4:5	DRIL 38.153	.	T	C	T	A	G	A	G	T	A	T	T	A	T	T	C	A	G	C	C	G	C	C	C	T	G	A	T	C	T	T	G	A	G	T	C	C	C	A	G	A	C	G	A	T	T	T	C/T
Ki3 x Oh7B BC3F4:5	DRIL 38.154	.	T	C	T	A	G	A	G	T	A	T	T	A	T	T	C	A	G	C	T	A	T	G	T	C	A	A	T	C	T	T	G	A	G	T	C	C	C	A	G	A	C	G	A	T	T	T	T
Ki3 x Oh7B BC3F4:5	DRIL 38.155	.	T	C	G	C	A	G	G	T	A/C	C/T	T	A	T	T	C	A	G	C	T	A	T	G	T	C	A	A	T	C	T	T	G	A	G	T	C	C	C	A	G	A	C	G	A	T	T	T	T
Ki3 x Oh7B BC3F4:5	DRIL 38.156	.	T	C	T	A	G	A	G	T	A	T	T	A	T	T	C	A	G	C	T	A	T	G	T	C	A	A	T	C	T	T	G	A	G	T	C	C	C	A	G	A	C	G	A	T	T	T	T
Ki3 x Oh7B BC3F4:5	DRIL 38.157	.	T	C	T	A	G	A	G	T	A	C	T	A	T	T	C	A	G	C	T	A	T	G	T	C	A	A	T	C	T	T	G	A	G	T	C	C	C	A	G	A	C	G	A	T	T	T	C
Ki3 x Oh7B BC3F4:5	DRIL 38.158	.	T	C	T	A	G	A	G	T	A	T	T	A	T	T	C	A	G	C	T	A	T	G	T	C	A	A	T	C	T	T	G	A	G	T	C	C	C	A	G	A	C	G	A	T	T	T	T
Ki3 x Oh7B BC3F4:5	DRIL 38.159	.	T	C	T	A	G	A	G	T	A	T	T	A	T	T	C	A	G	C	T	A	T	G	T	C	A	A	T	C	T	T	G	A	G	T	C	C	C	A	G	A	C	G	A	T	T	T	T
Ki3 x Oh7B BC3F4:5	DRIL 38.160	.	T	C	T	A	G	A	G	T	A	T	T	A	T	T	C	A	G	C	T	A	T	G	T	C	A	A	T	C	T	T	G	G	T	T	G	T	G	A	G	A	C	G	A	T	T	T	T
Ki3 x Oh7B BC3F4:5	DRIL 38.162	.	T	C	T	A	G	A	G	T	A	T	T	A	T	T	C	A	G	C	T	A	T	G	T	C	A	A	T	C	T	T	G	A	G	T	C	C	C	A	G	A	C	G	A	C	C	T	T
Ki3 x Oh7B BC3F4:5	DRIL 38.163	.	T	C	T	A	G	A	G	T	C	C/T	T	A	T	T	C	A	G	C	T	A	T	G	T	C	A	A	T	C	T	T	G	A	G	T	C	C	C	A	G	A	C	G	A	T	T	T	T
Ki3 x Oh7B BC3F4:5	DRIL 38.166	.	T	C	T	A	G	A	G	T	A	T	T	A	T	T	C	A	G	C	T	A	T	G	T	C	A	A	T	C	T	T	G	A	G	T	C	C	C	A	G	A	C	G	A	T	T	T	T
Ki3 x Oh7B BC3F4:5	DRIL 38.167	.	T	C	T	A	G	A	G	T	A	T	T	A	T	T	C	A	G	C	T	A	T	G	T	C	A	A	T	C	T	T	G	A	G	T	C	C	C	A	G	A	C	G	A	T	T	T	T
Ki3 x Oh7B BC3F4:5	DRIL 38.168	.	T	C	T	A	G	A	G	T	A	T	T	A	T	T	C	A	G	C	T	A	T	G	T	C	A	A	C	T	G	C	A	-	-	T	C	C	C	C	T	A	C	A	A	T	T	T	T
Ki3 x Oh7B BC3F4:5	DRIL 38.169	.	T	C	T	A	G	A	G	T	-	C	C	G	C	A	C	A	G	C	T	A	T	G	T	C	A	A	T	C	T	T	G	A	G	T	C	C	C	A	G	A	C	G	A	T	T	T	T
Ki3 x Oh7B BC3F4:5	DRIL 38.170	.	T	C	T	A	G	A	C	T	A	T	T	G	C	T	C	G	G	C	T	A	T	G	T	C	A	A	T	C	T	T	G	A	G	T	C	C	G	A	G	A	C	G	G	T	T	T	T
Ki3 x Oh7B BC3F4:5	DRIL 38.171	.	-	-	G	C	A	G	G	T	A	T	T	A	T	T	C	A	G	C	T	A	T	G	T	C	A	A	T	C	T	T	G	A	G	T	C	C	C	A	G	A	C	G	A	T	T	T	T
Ki3 x Oh7B BC3F4:5	DRIL 38.172	.	T	C	T	A	G	A	C	C	A	T	T	A	T	T	C	A	G	C	T	A	T	G	C	T	G	A	T	C	T	T	G	A	G	T	C	C	C	C	T	C	A	A	G	T	T	C/T	T
Ki3 x Oh7B BC3F4:5	DRIL 38.175	.	T	C	T	A	G	A	G	T	A	T	T	A	T	T	C	A	G	C	T	A	T	G	T	C	A	A	T	C	T	T	G	A	G	T	C	C	G	A	T	A	A	G	A	T	T	T	T
Ki3 x Oh7B BC3F4:5	DRIL 38.176	.	C	T	G	A	G	A	C	T	A	C	C	G	C	T	C	G	G	C	T	A	T	G	T	C	A	A	T	C	T	T	G	A	G	C	C	C	C	C	T	A	A	G	G	C	C	C	T
Ki3 x Oh7B BC3F4:5	DRIL 38.177	.	T	C	T	A	G	A	C	C	A	T	C/T	A/G	C/T	T	C	A	G	C	T	A	T	G	T	C	A	A	T	C	T	T	G	A	G	T	C	C	G	A	G	A	C	G	A	T	T	T	T
Ki3 x Oh7B BC3F4:5	DRIL 38.178	.	T	C	T	A	G	A	G	T	A	T	T	A	T	T	C	A	G	C	T	A	T	G	T	C	A	A	T	C	T	T	G	A	G	T	C	C	C	A	G	A	C	G	A	T	T	T	T
Ki3 x Oh7B BC3F4:5	DRIL 38.179	.	T	C	T	A	G	A	G	T	A	T	T	A	T	T	C	G	G	C	T	A	T	G	T	C	A	A	T	C	T	T	G	A	G	T	C	C	C	A	G	A	C	G	A	T	T	T	C
Ki3 x Oh7B BC3F4:5	DRIL 38.180	.	T	C	T	C	A	G	G	T	A	C	T	G	C	T	C	G	G	C	T	A	T	G	T	C	A	A	T	C	T	T	G	A	G	T	C	C	C	C	T	C	C	G	A	T	T	T	T
Ki3 x Oh7B BC3F4:5	DRIL 38.181	.	T	C	T	A	G	A	C	T	A	T	T	A	T	T	C	A/G	G	C	T	A	T	G	T	C	A	A	T	C	T	T	G	A	G	T	C	C	C	A	G	A	C	G	A	T	T	T	T
Ki3 x Oh7B BC3F4:5	DRIL 38.183	.	T	C	T	A	G	A	G	T	A	T	T	A	T	T	C	A	G	C	T	A	T	G	T	C	A	A	T	C	T	T	G	A	G	T	C	C	C	A	G	A	C	G	A	T	T	T	T
Ki3 x Oh7B BC3F4:5	DRIL 38.184	.	T	C	T	A	G	A	C	C	C	C	C	G	C	A	T	G	A	C	T	A	T	G	T	C	A	A	T	C	T	T	G	A	G	T	C	C	C	A	G	A	C	G	A	T	T	T	T
Ki3 x Oh7B BC3F4:5	DRIL 38.185	.	C/T	-	T	A	G	A	G	T	A	T	T	A	T	T	C	A	G	C	T	A	T	G	T	C	A	A	T	C	T	T	G	A	G	T	C	C	C	A/C	-	A	C	G	A	T	T	T	-
Ki3 x Oh7B BC3F4:5	DRIL 38.186	.	T	C	T	A	G	A	G	T	A	T	T	A	T	T	C	A	G	C	T	A	T	G	T	C	A	A	T	C	T	T	G	A	G	T	C	C	C	C	G	A	C	G	A	T	T	T	T
Ki3 x Oh7B BC3F4:5	DRIL 38.187	.	T	C	T	A	G	A	G	T	A	T	T	A	T	T	C	A	G	C	T	A	T	G	T	C	A	A	T	C	T	T	G	A	G	C	C	C	C	A	G	A	C	G	A	T	T	T	T
Ki3 x Oh7B BC3F4:5	DRIL 38.188	.	T	C	T	A	G	A	G	C	A	T	T	A	T	T	C	A	G	C	T	A	T	G	T	C	A	A	T	C	T	T	G	A	G	T	C	C	C	A	G	A	C	G	A	T	T	C	C
Ki3 x Oh7B BC3F4:5	DRIL 38.189	.	T	C	T	A	G	A	G	T	A	T	T	A	T	T	C	A	G	C	T	A	T	G	T	C	A	A	T	C	T	T	G	A	G	T	C	C	C	A	G	A	C	G	A	T	T	T	C
Ki3 x Oh7B BC3F4:5	DRIL 38.190	.	T	C	T	A	G	A	G	T	A	T	T	A	T	T	C	A	G	C	T	A	T	G	T	C	A	A	T	C	G	C	A	G	T	T	G	T	G	C	G	A	C	G	A	T	T	T	T
Ki3 x Oh7B BC3F4:5	DRIL 38.191	.	T	C	T	A	G	A	G	T	A	T	T	A	T	T	C	A	G	T	C	G	C	C	C	T	G	T	T	C	T	T	G	A	G	T	C	C	G	A	G	A	C	G	A	T	T	T	T
Ki3 x Oh7B BC3F4:5	DRIL 38.192	.	T	C	G	A	G	A	C	T	A	C	T	A	T	T	C	A	G	C	T	A	T	G	T	C	A	A	T	C	T	C	A	G	T	T	G	C	C	C	T	A	A/C	G	G	T	T	T	T
Ki3 x Oh7B BC3F4:5	DRIL 38.193	.	T	C	G	A	G	A	G	T	A	T	T	A	T	T	C	A	G	C	T	A	T	G	T	C	A	A	T	C	G	C	A	A	G	T	C	C	C	A	G	A	C	G	A	T	T	C	C
Ki3 x Oh7B BC3F4:5	DRIL 38.194	.	T	C	T	A	G	A	G	T	A	T	T	A	T	T	C	A	G	C	T	A	T	G	T	C	A	A	T	C	T	T	G	A	G	T	C	C	C	A	G	A	C	A	A	T	T	T	T
Ki3 x Oh7B BC3F4:5	DRIL 38.195	.	T	C	G	A	G	A	G	T	A	C	C	G	C	A	C/T	-	-	C	T	A	T	G	T	T	G	T	C	T	G	C	A	A	G	T	C	C	C	A	G	A	C	G	A	T	T	T	T
Ki3 x Oh7B BC3F4:5	DRIL 38.196	.	T	C	T	A	G	A	C	C	C	C	C	G	C	A	T	G	A	-	T	A	T	G	T	C	A	A	T	C	T	T	G	A	G	T	C	C	C	A	G	A	C	G	A	T	T	T	T
Ki3 x Oh7B BC3F4:5	DRIL 38.197	.	T	C	T	A	G	A	G	T	A	T	T	A	T	T	C	A	G	C	T	A	T	G	T	T	A	T	C	T	T	T	G	A	G	T	C	C	C	A	G	A	C	G	A	T	T	T	T
Ki3 x Oh7B BC3F4:5	DRIL 38.198	.	C	T	T	-	A/G	-	C	T	C	T	T	A	T	T	C	A	G	C	T	A	T	G	T	C	A	A	T	C	T	T	G	A	G	T	C	C	C	C	G	A	C	G	A	T	T	T	T
Ki3 x Oh7B BC3F4:5	DRIL 38.199	.	T	C	T	A	G	A	G	T	A	T	C	G	C	T	C	G	G	C	T	A	T	G	T	C	A	A	T	C	T	T	G	A	G	T	C	C	C	C	T	A	C	G	A	T	T	T	T
Ki3 x Oh7B BC3F4:5	DRIL 38.201	.	T	C	T	A	G	A	C	C	A	T	T	A	T	T	C	A	G	C	T	A	T	G	T	C	A	A	T	C	T	T	G	A	G	T	C	C	C	A	G	A	C	G	A	T	T	T	T
Ki3 x Oh7B BC3F4:5	DRIL 38.202	.	T	C	T	A	G	A	C	C	A	T	T	A	T	T	C	A	G	C	T	A	T	G	T	C	A	A	T	C	T	T	G	A	G	T	C	C	G	A	G	A	C	G	A	T	T	T	T
Ki3 x Oh7B BC3F4:5	DRIL 38.203	.	C	T	G	C	A	G	C	C	C	C	C	G	C	A	C	A	G	C	T	A	T	G	T	C	A	A	T	C	T	T	G	A	T	T	G	T	G	-	G	A	C	G	A	T	T	T	T
Ki3 x Oh7B BC3F4:5	DRIL 38.205	.	T	C	T	A	G	A	G	C	A	T	T	A	T	T	C	A	G	C	T	A	T	G	T	C	A	A	T	C	T	T	G	A	G	T	C	C	C	A	T	A	C	G	A/G	T	T	T	T
Ki3 x Oh7B BC3F4:5	DRIL 38.206	.	T	C	T	A	G	A	G	T	A	T	T	A	T	T	C	A	G	C	T	A	T	G	C	T	A/G	T	C	T	T	T	G	A	G	T	C	C	C	A	G	A	C	G	G	T	T	T	T
Ki3 x Oh7B BC3F4:5	DRIL 38.207	.	T	C	T	-	-	A/G	C	T	A	C	C	G	C	A	C	A/G	G	C	T	A	T	G	T	C	A	A	T	C	T	T	G	A	G	T	C	C	G	C	T	C	C	G	A	T	T	T	T
Ki3 x Oh7B BC3F4:5	DRIL 38.208	.	T	C	T	A	G	A	G	T	A	T	T	A	T	T	C	A	G	C	T	A	T	G	T	C	A	A	T	C	T	C	A	-	G	T	C	C	G	A	G	A	C	G	A	T	T	T	T
Ki3 x Oh7B BC3F4:5	DRIL 38.209	.	T	C	T	A	G	A	C	C	A	T	T	A	T	T	C	A	G	C	T	A	T	G	T	C	A	A	T	C/T	T	-	A/G	A	G	T	C	C	C	A	G	A	C	G	A	T	-	C/T	T
Ki3 x Oh7B BC3F4:5	DRIL 38.210	.	T	C	G	A	G	A	C	C	C	C	C	G	C	A	-	A/G	A/G	C	T	A	T	G	T	C	A	A	T	C	T	T	G	A	G	T	C	C	G	A	G	A	C	G	A	T	T	T	T
Ki3 x Oh7B BC3F4:5	DRIL 38.211	.	T	C	T	A	A	G	G	T	A	T	T	A	T	T	C	A	G	T	T	A	T	G	T	C	A	A	T	C	T	T	G	A	G	T	C	C	C	A	G	A	C	A	A	T	T	T	T
Ki3 x Oh7B BC3F4:5	DRIL 38.214	.	T	C	T	A	G	A	C	T	A	T	T	A	T	T	C	A	G	C	T	A	C	C	T	C	A	A	T	C	T	T	G	A	G	T	C	C	C	A	G	A	C	G	A	T	T	T	T
Ki3 x Oh7B BC3F4:5	DRIL 38.216	.	T	C	T	A	G	A	G	T	A	T	T	A	T	T	C	A	G	T	C	G	T	G	T	C	A	A	T	C	T	T	G	A	G	T	C	C	C	A	G	A	C	G	A	T	T	T	T
Ki3 x Oh7B BC3F4:5	DRIL 38.217	.	T	C	T	A	G	A	C	C	A	T	T	A	T	T	C	A	G	C	T	A	T	G	T	C	A	A	T	C	T	T	G	A	G	T	C	C	C	A	G	A	C	G	A	T	T	T	T
Ki3 x Oh7B BC3F4:5	DRIL 38.218	.	T	C	T	A	G	A	G	T	A	T	T	A	T	T	C	A	G	C	T	A	T	G	T	C	A	A	T	C	T	T	G	A	G	T	C	C	-	C	T	A	A	G	A	T	T	T	T
Ki3 x Oh7B BC3F4:5	DRIL 38.219	.	T	C	G	C	A	G	C	C	A	C	C	G	C	A	T	G	A	C	C	G	C	C	C	T	A	A	C	T	T	T	G	A	T	T	G	T	G	A	G	A	C	G	A	T	T	T	T
Ki3 x Oh7B BC3F4:5	DRIL 38.220	.	T	C	G	A	G	A	C	C	A	T	T	A	T	T	C	A	G	C	T	A	T	G	T	C	A	A	T	C	T	T	G	A	G	T	C	C	C/G	A	G	A	C	G	A	T	T	T	T
Ki3 x Oh7B BC3F4:5	DRIL 38.221	.	T	C	T	A	G	A	G	T	C	T	T	A	T	T	C	A	G	T	C	A	T	G	T	C	A	A	T	C	T	T	G	A	G	C	C	C	C	A	G	A	A	A	G	-	-	C/T	C/T
Ki3 x Oh7B BC3F4:5	DRIL 38.222	.	T	C	T	A	G	A	G	T	A	C	C	G	C	A	T	G	A	T	C	G	T	G	T	C	A	A	C	T	G	C	A	G	T	T	G	T	G	A	T	A	C	G	A	T	T	T	T
Ki3 x Oh7B BC3F4:5	DRIL 38.223	.	T	C	G	A	G	A	G	T	A	C	T	A	T	T	C	A	G	C	T	A	T	G	T	C	G	T	T	C	T	T	G	A	G	T	C	C	C	A	G	A	C	G	A	T	T	T	T
Ki3 x Oh7B BC3F4:5	DRIL 38.224	.	T	C	T	A	G	A	G	T	A	C	C	G	C	T	C	A	G	C	T	A	T	G	T	C	A	A	T	C	T	T	G	A	G	T	C	C	G	A	G	A	A	A	A	T	T	T	T
Ki3 x Oh7B BC3F4:5	DRIL 38.225	.	T	C	T	A	G	A	G	T	A	C	C	G	C	T	C	G	G	C	T	A	T	G	T	C	A	A	T	C	T	T	G	A	G	T	C	C	G	A	G	A	A	G	A	T	T	T	T
Ki3 x Oh7B BC3F4:5	DRIL 38.226	.	T	C	T	A	G	A	G	-	-	C/T	T	A	T	T	C	G	G	C	T	A	T	G	T	C	A	A	T	C	T	T	G	A	G	T	C	C	C	A	T	A	C	G	A/G	-	-	T	T
Ki3 x Oh7B BC3F4:5	DRIL 38.227	.	T	C	T	A	G	A	G	T	A	T	T	A	T	T	C	G	G	C	T	A	T	G	T	C	A	A	T	C	T	T	G	A	G	T	C	C	C	A	T	A	C	G	A	T	T	T	T
Ki3 x Oh7B BC3F4:5	DRIL 38.228	.	T	C	G/T	A	G	A	C	C	A	T	T	A	T	T	C	A	G	C	T	A	T	G	T	C	A	A	T	C	T	T	G	A	G	T	C	C	G	A	G	A	C	A	A	T	T	T	T
Ki3 x Oh7B BC3F4:5	DRIL 38.229	.	T	C	T	A	G	A	G	T	A	T	T	A	T	T	C	A	G	C	T	A	T	G	T	C	A	A	T	C	T	T	G	A	G	T	C	C	C	A	G	A	C	G	A	T	T	T	T
Ki3 x Oh7B BC3F4:5	DRIL 38.230	.	T	C	T	A	G	A	C	T	A	T	T	A	T	T	C	A	G	C	T	A	T	G	T	C	A	A	T	C	G	C	A	G	G	C	C	C	C	A	G	A	A/C	G	A	T	T	C	C
Ki3 x Oh7B BC3F4:5	DRIL 38.231	.	T	C	T	-	A	G	C/G	-	C	T	T	A	T	T	C	A	G	C	C	G	C	C	C	T	A	A	T	C	T	T	G	A	G	T	C	C	C	A	T	A	A	G	A	T	T	T	T
Ki3 x Oh7B BC3F4:5	DRIL 38.232	.	T	C	G	A	G	A	C/G	T	-	C	C	G	C	A	C	A	G	C	T	A	T	G	T	C	A	A	T	C	T	T	G	A	G	T	C	C	C	A	G	A	C	G	A	T	T	T	C/T
[truncated: 192 more columns]
